# Supplementary material for: Host genotype and sex shape influenza evolution and defective viral genomes
Source: Research Square preprint supplement (doi:10.21203/rs.3.rs-6394216/v1), 2025-05-19
Supplement: Supplementary file 1 [file a0a625d868a04f4fe5b73320.xlsx]

## Sheet: Corrected.variants-single4x
SampleID	HostStrain	Sex	Host	Treatment	Line	Round	Variant	Variant - HA corrected	Corr.Freq	Count	Ref	Var	Sequence	Class.x	Segment	AA.Position	Position	OR	coding.pos	Ref_AA.x	Var_AA.x	Mutation	total.cov.ctrl	total.cov.tst	total.n.ctrl	total.n.tst
9518	BALB/C	M	BALBM	1X	B	10	HA D2G	HA1 D2G	0.466216	1	A	G	Var	Nonsyn	HA	18	56	HA	53	D	G	HA_A56G	1871	296	0	138
9518	BALB/C	M	BALBM	1X	B	10	HA N8S	HA1 N8S	0.0978261	1	A	G	Var	Nonsyn	HA	24	74	HA	71	N	S	HA_A74G	1046	184	2	18
97690	BALB/C	F	BALBF	2X	AB	10	HA T10I	HA1 T10I	0.199423	3	C	T	Var	Nonsyn	HA	26	80	HA	77	T	I	HA_C80T	2329	3465	0	691
97680	BALB/C	F	BALBF	1X	A	10	HA T10T	HA1 T10T	0.017341	2	A	T	Var	Syn	HA	26	81	HA	78	T	T	HA_A81T	2331	3633	0	63
10649	BALB/C	F	BALBF	1XP	1XP	Test (R11)	HA T10T	HA1 T10T	0.142857	2	A	T	Var	Syn	HA	26	81	HA	78	T	T	HA_A81T	1148	35	0	5
9740	C57BL/6	F	BL6F	1X	A	7	HA H18H	HA1 H18H	0.07	1	T	C	Var	Syn	HA	34	105	HA	102	H	H	HA_T105C	1466	100	0	7
97860	BALB/C	F	BALBF	2X	CD	10	HA A19A	HA1 A19A	0.0215992	2	G	A	Var	Syn	HA	35	108	HA	105	A	A	HA_G108A	2866	4815	2	104
10317	C57BL/6	F	BL6F	1X	D	10	HA I29I	HA1 I29I	0.673913	1	C	T	Var	Syn	HA	45	138	HA	135	I	I	HA_C138T	3393	1242	1	837
10307	C57BL/6	M	BL6M	1X	D	10	HA Q44Q	HA1 Q44Q	0.334202	1	G	A	Var	Syn	HA	60	183	HA	180	Q	Q	HA_G183A	4118	1918	0	641
97730	BALB/C	F	BALBF	1X	B	10	HA G49G	HA1 G49G	0.0116942	1	G	A	Var	Syn	HA	65	198	HA	195	G	G	HA_G198A	2188	3506	0	41
9516	BALB/C	M	BALBM	2X	AB	10	HA K50T	HA1 K50T	0.0734024	1	A	C	Var	Nonsyn	HA	66	200	HA	197	K	T	HA_A200C	4259	1158	0	85
10304	C57BL/6	M	BL6M	1X	C	10	HA P55P	HA1 P55P	0.0156971	3	T	C	Var	Syn	HA	71	216	HA	213	P	P	HA_T216C	2156	1083	0	17
10305	C57BL/6	M	BL6M	2X	CD	10	HA P55P	HA1 P55P	0.0180645	3	T	C	Var	Syn	HA	71	216	HA	213	P	P	HA_T216C	2304	775	0	14
97690	BALB/C	F	BALBF	2X	AB	10	HA L59I	HA1 L59I	0.0103376	2	C	A	Var	Nonsyn	HA	75	226	HA	223	L	I	HA_C226A	4333	6191	0	64
9536	BALB/C	M	BALBM	1X	D	10	HA G61G	HA1 G61G	0.057971	1	A	G	Var	Syn	HA	77	234	HA	231	G	G	HA_A234G	2272	69	0	4
97730	BALB/C	F	BALBF	1X	B	10	HA I62V	HA1 I62V	0.0101816	1	A	G	Var	Nonsyn	HA	78	235	HA	232	I	V	HA_A235G	2281	3634	0	37
9945	C57BL/6	F	BL6F	1X	D	7	HA D68D	HA1 D68D	0.0425532	1	T	C	Var	Syn	HA	84	255	HA	252	D	D	HA_T255C	2191	188	0	8
9740	C57BL/6	F	BL6F	1X	A	7	HA L71L	HA1 L71L	0.0935252	1	G	A	Var	Syn	HA	87	264	HA	261	L	L	HA_G264A	2340	139	0	13
9536	BALB/C	M	BALBM	1X	D	10	HA G72G	HA1 G72G	0.118644	1	G	A	Var	Syn	HA	88	267	HA	264	G	G	HA_G267A	2284	59	0	7
9515	BALB/C	M	BALBM	1X	A	10	HA D73D	HA1 D73D	0.0223464	1	C	T	Var	Syn	HA	89	270	HA	267	D	D	HA_C270T	2245	358	0	8
9518	BALB/C	M	BALBM	1X	B	10	HA P74L	HA1 P74L	0.0507246	1	C	T	Var	Nonsyn	HA	90	272	HA	269	P	L	HA_C272T	2279	276	0	14
97830	BALB/C	F	BALBF	1X	C	10	HA V78I	HA1 V78I	0.0122728	2	G	A	Var	Nonsyn	HA	94	283	HA	280	V	I	HA_G283A	4436	6437	0	79
9337	BALB/C	F	BALBF	2X	CD	4	HA F79F	HA1 F79F	0.258065	1	T	C	Var	Syn	HA	95	288	HA	285	F	F	HA_T288C	2280	31	0	8
10313	C57BL/6	F	BL6F	2X	AB	10	HA E82D	HA1 E82D	0.0130597	1	G	T	Var	Nonsyn	HA	98	297	HA	294	E	D	HA_G297T	2341	1072	0	14
9537	BALB/C	M	BALBM	2X	CD	10	HA S91S	HA1 S91S	0.214286	2	C	T	Var	Syn	HA	107	324	HA	321	S	S	HA_C324T	2244	14	0	3
10624	BALB/C	F	BALBF	2X	CD	Test (R11)	HA S91S	HA1 S91S	0.0190931	2	C	T	Var	Syn	HA	107	324	HA	321	S	S	HA_C324T	2244	419	0	8
8539	BALB/C	M	BALBM	Stock	D	1	HA F94F	HA1 F94F	0.0456853	1	C	T	Var	Syn	HA	110	333	HA	330	F	F	HA_C333T	2224	197	0	9
97730	BALB/C	F	BALBF	1X	B	10	HA N96S	HA1 N96S	0.0120378	2	A	G	Var	Nonsyn	HA	112	338	HA	335	N	S	HA_A338G	4428	6978	1	84
97730	BALB/C	F	BALBF	1X	B	10	HA N96N	HA1 N96N	0.0207434	2	C	T	Var	Syn	HA	112	339	HA	336	N	N	HA_C339T	4549	7183	2	149
97860	BALB/C	F	BALBF	2X	CD	10	HA V102M	HA1 V102M	0.0455307	7	G	A	Var	Nonsyn	HA	118	355	HA	352	V	M	HA_G355A	4558	7160	0	326
9516	BALB/C	M	BALBM	2X	AB	10	HA V102M	HA1 V102M	0.234654	7	G	A	Var	Nonsyn	HA	118	355	HA	352	V	M	HA_G355A	4558	1287	0	302
9518	BALB/C	M	BALBM	1X	B	10	HA V102M	HA1 V102M	0.0510367	7	G	A	Var	Nonsyn	HA	118	355	HA	352	V	M	HA_G355A	4558	627	0	32
10624	BALB/C	F	BALBF	2X	CD	Test (R11)	HA R109R	HA1 R109R	0.047619	1	G	A	Var	Syn	HA	125	378	HA	375	R	R	HA_G378A	2254	189	0	9
9518	BALB/C	M	BALBM	1X	B	10	HA S110A	HA1 S110A	0.0802568	4	T	G	Var	Nonsyn	HA	126	379	HA	376	S	A	HA_T379G	4432	623	0	50
10313	C57BL/6	F	BL6F	2X	AB	10	HA A113A	HA1 A113A	0.015582	1	C	A	Var	Syn	HA	129	390	HA	387	A	A	HA_C390A	2171	1091	0	17
0	STOCK	STOCK	STOCK	STOCK	STOCK	STOCK	HA L118L	HA1 L118L	0.0285714	11	G	A	Var	Syn	HA	134	405	HA	402	L	L	HA_G405A	4639	5880	0	168
8235	C57BL/6	M	BL6M	Stock	C	1	HA L118L	HA1 L118L	0.0432331	11	G	A	Var	Syn	HA	134	405	HA	402	L	L	HA_G405A	4639	1596	0	69
8278	C57BL/6	M	BL6M	Stock	A	1	HA L118L	HA1 L118L	0.0224215	11	G	A	Var	Syn	HA	134	405	HA	402	L	L	HA_G405A	4639	1338	0	30
8325	C57BL/6	F	BL6F	Stock	C	1	HA L118L	HA1 L118L	0.0352113	11	G	A	Var	Syn	HA	134	405	HA	402	L	L	HA_G405A	2375	426	0	15
8326	C57BL/6	F	BL6F	Stock	B	1	HA L118L	HA1 L118L	0.0396825	11	G	A	Var	Syn	HA	134	405	HA	402	L	L	HA_G405A	2264	126	0	5
8327	C57BL/6	F	BL6F	Stock	A	1	HA L118L	HA1 L118L	0.0212264	11	G	A	Var	Syn	HA	134	405	HA	402	L	L	HA_G405A	4639	1696	0	36
8539	BALB/C	M	BALBM	Stock	D	1	HA L118L	HA1 L118L	0.0514286	11	G	A	Var	Syn	HA	134	405	HA	402	L	L	HA_G405A	2264	175	0	9
9287	C57BL/6	F	BL6F	2X	CD	4	HA L118L	HA1 L118L	0.0168539	11	G	A	Var	Syn	HA	134	405	HA	402	L	L	HA_G405A	2264	890	0	15
9297	C57BL/6	F	BL6F	2X	AB	4	HA L118L	HA1 L118L	0.0191304	11	G	A	Var	Syn	HA	134	405	HA	402	L	L	HA_G405A	2375	1150	0	22
10300	C57BL/6	M	BL6M	2X	AB	10	HA L118L	HA1 L118L	0.36254	11	G	A	Var	Syn	HA	134	405	HA	402	L	L	HA_G405A	4639	2488	0	902
9738	C57BL/6	F	BL6F	4X	ABCD	7	HA L118L	HA1 L118L	0.0146862	11	G	A	Var	Syn	HA	134	405	HA	402	L	L	HA_G405A	2375	749	0	11
10317	C57BL/6	F	BL6F	1X	D	10	HA E119K	HA1 E119K	0.0196672	1	G	A	Var	Nonsyn	HA	135	406	HA	403	E	K	HA_G406A	2341	661	0	13
97690	BALB/C	F	BALBF	2X	AB	10	HA I121T	HA1 I121T	0.0128925	2	T	C	Var	Nonsyn	HA	137	413	HA	410	I	T	HA_T413C	4462	6593	0	85
10314	C57BL/6	F	BL6F	1X	C	10	HA T128I	HA1 T128I	0.0110803	1	C	T	Var	Nonsyn	HA	144	434	HA	431	T	I	HA_C434T	2313	1444	0	16
9536	BALB/C	M	BALBM	1X	D	10	HA G129G	HA1 G129G	0.147287	1	G	A	Var	Syn	HA	145	438	HA	435	G	G	HA_G438A	4585	129	0	19
9515	BALB/C	M	BALBM	1X	A	10	HA T131T	HA1 T131T	0.0343915	1	T	C	Var	Syn	HA	147	444	HA	441	T	T	HA_T444C	2235	378	0	13
10314	C57BL/6	F	BL6F	1X	C	10	HA N137D	HA1 N137D	0.135929	1	A	G	Var	Nonsyn	HA	153	460	HA	457	N	D	HA_A460G	4459	3134	0	426
10307	C57BL/6	M	BL6M	1X	D	10	HA A138T	HA1 A138T	0.45865	1	G	A	Var	Nonsyn	HA	154	463	HA	460	A	T	HA_G463A	4499	2237	1	1026
10009	C57BL/6	M	BL6M	4X	ABCD	10	HA G142G	HA1 G142G	0.0695489	1	A	G	Var	Syn	HA	158	477	HA	474	G	G	HA_A477G	4339	1596	0	111
9518	BALB/C	M	BALBM	1X	B	10	HA G144G	HA1 G144G	0.0310881	1	T	C	Var	Syn	HA	160	483	HA	480	G	G	HA_T483C	2035	386	0	12
97680	BALB/C	F	BALBF	1X	A	10	HA S145G	HA1 S145G	0.0147039	3	A	G	Var	Nonsyn	HA	161	484	HA	481	S	G	HA_A484G	4399	7277	1	107
9518	BALB/C	M	BALBM	1X	B	10	HA G146D	HA1 G146D	0.0300429	1	G	A	Var	Nonsyn	HA	162	488	HA	485	G	D	HA_G488A	2320	233	0	7
10314	C57BL/6	F	BL6F	1X	C	10	HA R150I	HA1 R150I	0.054471	2	G	T	Var	Nonsyn	HA	166	500	HA	497	R	I	HA_G500T	4582	3176	0	173
10302	C57BL/6	M	BL6M	1X	B	10	HA R150K	HA1 R150K	0.180266	2	G	A	Var	Nonsyn	HA	166	500	HA	497	R	K	HA_G500A	4582	1054	0	190
97690	BALB/C	F	BALBF	2X	AB	10	HA L151L	HA1 L151L	0.0359281	2	G	T	Var	Syn	HA	167	504	HA	501	L	L	HA_G504T	4622	6847	0	246
10624	BALB/C	F	BALBF	2X	CD	Test (R11)	HA G158G	HA1 G158G	0.0384615	1	A	G	Var	Syn	HA	174	525	HA	522	G	G	HA_A525G	2225	156	0	6
97850	BALB/C	F	BALBF	4X	ABCD	10	HA S159G	HA1 S159G	0.0505065	4	A	G	Var	Nonsyn	HA	175	526	HA	523	S	G	HA_A526G	4457	7009	5	354
10314	C57BL/6	F	BL6F	1X	C	10	HA P162T	HA1 P162T	0.0253837	1	C	A	Var	Nonsyn	HA	178	535	HA	532	P	T	HA_C535A	4814	3388	0	86
10307	C57BL/6	M	BL6M	1X	D	10	HA P162L	HA1 P162L	0.0212072	1	C	T	Var	Nonsyn	HA	178	536	HA	533	P	L	HA_C536T	4747	2452	1	52
8244	C57BL/6	M	BL6M	Stock	B	1	HA L164L	HA1 L164L	0.0697674	1	C	T	Var	Syn	HA	180	541	HA	538	L	L	HA_C541T	2358	215	3	15
10314	C57BL/6	F	BL6F	1X	C	10	HA L164M	HA1 L164M	0.0177074	1	C	A	Var	Nonsyn	HA	180	541	HA	538	L	M	HA_C541A	4678	3219	0	57
97680	BALB/C	F	BALBF	1X	A	10	HA N165D	HA1 N165D	0.0127813	12	A	G	Var	Nonsyn	HA	181	544	HA	541	N	D	HA_A544G	4667	7511	0	96
9516	BALB/C	M	BALBM	2X	AB	10	HA N165D	HA1 N165D	0.648105	12	A	G	Var	Nonsyn	HA	181	544	HA	541	N	D	HA_A544G	4667	1293	0	838
9518	BALB/C	M	BALBM	1X	B	10	HA N165D	HA1 N165D	0.186916	12	A	G	Var	Nonsyn	HA	181	544	HA	541	N	D	HA_A544G	4667	642	0	120
9537	BALB/C	M	BALBM	2X	CD	10	HA N165D	HA1 N165D	0.973684	12	A	G	Var	Nonsyn	HA	181	544	HA	541	N	D	HA_A544G	4667	38	0	37
10311	C57BL/6	F	BL6F	4X	ABCD	10	HA N165D	HA1 N165D	0.970257	12	A	G	Var	Nonsyn	HA	181	544	HA	541	N	D	HA_A544G	4667	1244	0	1207
10300	C57BL/6	M	BL6M	2X	AB	10	HA N165D	HA1 N165D	0.0191595	12	A	G	Var	Nonsyn	HA	181	544	HA	541	N	D	HA_A544G	2305	1618	0	31
10305	C57BL/6	M	BL6M	2X	CD	10	HA N165D	HA1 N165D	0.355165	12	A	G	Var	Nonsyn	HA	181	544	HA	541	N	D	HA_A544G	4667	1481	0	526
9516	BALB/C	M	BALBM	2X	AB	10	HA N165E	HA1 N165E	0.0294574	2	C	A	Var	Nonsyn	HA	181	546	HA	543	N	E	HA_C546A	4645	1290	1	38
10313	C57BL/6	F	BL6F	2X	AB	10	HA V166M	HA1 V166M	0.0239808	2	G	A	Var	Nonsyn	HA	182	547	HA	544	V	M	HA_G547A	2334	1251	0	30
10305	C57BL/6	M	BL6M	2X	CD	10	HA T167A	HA1 T167A	0.137114	3	A	G	Var	Nonsyn	HA	183	550	HA	547	T	A	HA_A550G	4580	1393	2	191
9536	BALB/C	M	BALBM	1X	D	10	HA T167I	HA1 T167I	0.182927	2	C	T	Var	Nonsyn	HA	183	551	HA	548	T	I	HA_C551T	2287	82	0	15
10314	C57BL/6	F	BL6F	1X	C	10	HA T167N	HA1 T167N	0.621872	1	C	A	Var	Nonsyn	HA	183	551	HA	548	T	N	HA_C551A	4640	3237	0	2013
10314	C57BL/6	F	BL6F	1X	C	10	HA T167N	HA1 T167N	0.0595784	1	T	C	Var	Nonsyn	HA	183	552	HA	549	T	N	HA_T552C	4560	3273	0	195
9945	C57BL/6	F	BL6F	1X	D	7	HA L177L	HA1 L177L	0.04	1	A	G	Var	Syn	HA	193	582	HA	579	L	L	HA_A582G	4740	450	1	18
10317	C57BL/6	F	BL6F	1X	D	10	HA V182I	HA1 V182I	0.0226537	1	G	A	Var	Nonsyn	HA	198	595	HA	592	V	I	HA_G595A	2083	618	0	14
10307	C57BL/6	M	BL6M	1X	D	10	HA T187M	HA1 T187M	0.0139688	1	C	T	Var	Nonsyn	HA	203	611	HA	608	T	M	HA_C611T	2187	1217	0	17
9518	BALB/C	M	BALBM	1X	B	10	HA T187T	HA1 T187T	0.0571429	2	G	A	Var	Syn	HA	203	612	HA	609	T	T	HA_G612A	2199	210	0	12
9943	C57BL/6	F	BL6F	2X	CD	7	HA T187T	HA1 T187T	0.0897155	2	G	A	Var	Syn	HA	203	612	HA	609	T	T	HA_G612A	2199	457	0	41
97690	BALB/C	F	BALBF	2X	AB	10	HA N188N	HA1 N188N	0.0296016	2	C	T	Var	Syn	HA	204	615	HA	612	N	N	HA_C615T	4375	6351	1	188
10302	C57BL/6	M	BL6M	1X	B	10	HA Q189*	HA1 Q189*	0.0285088	1	C	T	Var	Stop	HA	205	616	HA	613	Q	*	HA_C616T	2242	456	0	13
9536	BALB/C	M	BALBM	1X	D	10	HA S199S	HA1 S199S	0.0897436	1	A	C	Var	Syn	HA	215	648	HA	645	S	S	HA_A648C	2217	78	0	7
10309	C57BL/6	F	BL6F	1X	A	10	HA V202V	HA1 V202V	0.0126582	1	C	A	Var	Syn	HA	218	657	HA	654	V	V	HA_C657A	2364	1659	0	21
97860	BALB/C	F	BALBF	2X	CD	10	HA T203K	HA1 T203K	0.0858601	3	C	A	Var	Nonsyn	HA	219	659	HA	656	T	K	HA_C659A	4506	6464	0	555
97760	BALB/C	F	BALBF	1X	D	10	HA S205Y	HA1 S205Y	0.2921	5	C	A	Var	Nonsyn	HA	221	665	HA	662	S	Y	HA_C665A	4510	6063	0	1771
10300	C57BL/6	M	BL6M	2X	AB	10	HA S205Y	HA1 S205Y	0.244208	5	C	A	Var	Nonsyn	HA	221	665	HA	662	S	Y	HA_C665A	4510	2633	0	643
10313	C57BL/6	F	BL6F	2X	AB	10	HA Q210R	HA1 Q210R	0.020056	1	A	G	Var	Nonsyn	HA	226	680	HA	677	Q	R	HA_A680G	4311	2144	7	43
97690	BALB/C	F	BALBF	2X	AB	10	HA G218W	HA1 G218W	0.963367	27	G	T	Var	Nonsyn	HA	234	703	HA	700	G	W	HA_G703T	4101	5869	2	5654
97850	BALB/C	F	BALBF	4X	ABCD	10	HA G218W	HA1 G218W	0.998796	27	G	T	Var	Nonsyn	HA	234	703	HA	700	G	W	HA_G703T	4101	6644	2	6636
97730	BALB/C	F	BALBF	1X	B	10	HA G218W	HA1 G218W	0.998826	27	G	T	Var	Nonsyn	HA	234	703	HA	700	G	W	HA_G703T	4101	6816	2	6808
97830	BALB/C	F	BALBF	1X	C	10	HA G218W	HA1 G218W	0.999669	27	G	T	Var	Nonsyn	HA	234	703	HA	700	G	W	HA_G703T	4101	6035	2	6033
97860	BALB/C	F	BALBF	2X	CD	10	HA G218W	HA1 G218W	0.45614	27	G	T	Var	Nonsyn	HA	234	703	HA	700	G	W	HA_G703T	4101	6441	2	2938
97860	BALB/C	F	BALBF	2X	CD	10	HA G218E	HA1 G218E	0.42041	10	G	A	Var	Nonsyn	HA	234	704	HA	701	G	E	HA_G704A	4123	6389	0	2686
97760	BALB/C	F	BALBF	1X	D	10	HA G218E	HA1 G218E	0.0964702	10	G	A	Var	Nonsyn	HA	234	704	HA	701	G	E	HA_G704A	4123	5411	0	522
9517	BALB/C	M	BALBM	4X	ABCD	10	HA G218E	HA1 G218E	0.0230624	10	G	A	Var	Nonsyn	HA	234	704	HA	701	G	E	HA_G704A	4123	2645	0	61
97690	BALB/C	F	BALBF	2X	AB	10	HA R220S	HA1 R220S	0.0355261	3	A	T	Var	Nonsyn	HA	236	711	HA	708	R	S	HA_A711T	4143	5883	0	209
9940	C57BL/6	F	BL6F	1X	C	7	HA G225G	HA1 G225G	0.0523256	2	T	C	Var	Syn	HA	241	726	HA	723	G	G	HA_T726C	2126	172	0	9
9515	BALB/C	M	BALBM	1X	A	10	HA S227P	HA1 S227P	0.0382514	2	T	C	Var	Nonsyn	HA	243	730	HA	727	S	P	HA_T730C	2093	183	0	7
10312	C57BL/6	F	BL6F	1X	B	10	HA R229G	HA1 R229G	0.953271	2	A	G	Var	Nonsyn	HA	245	736	HA	733	R	G	HA_A736G	4551	2140	0	2040
97680	BALB/C	F	BALBF	1X	A	10	HA R229K	HA1 R229K	0.982499	6	G	A	Var	Nonsyn	HA	245	737	HA	734	R	K	HA_G737A	4629	6971	1	6849
10304	C57BL/6	M	BL6M	1X	C	10	HA I230L	HA1 I230L	0.0114017	1	A	C	Var	Nonsyn	HA	246	739	HA	736	I	L	HA_A739C	2286	1491	0	17
10313	C57BL/6	F	BL6F	2X	AB	10	HA V237I	HA1 V237I	0.0336743	2	G	A	Var	Nonsyn	HA	253	760	HA	757	V	I	HA_G760A	4537	2346	0	79
97860	BALB/C	F	BALBF	2X	CD	10	HA K238E	HA1 K238E	0.0307203	3	A	G	Var	Nonsyn	HA	254	763	HA	760	K	E	HA_A763G	4513	6608	0	203
9515	BALB/C	M	BALBM	1X	A	10	HA K238R	HA1 K238R	0.0446927	1	A	G	Var	Nonsyn	HA	254	764	HA	761	K	R	HA_A764G	2166	179	1	8
10637	BALB/C	F	BALBF	2X	AB	Test (R11)	HA P239P	HA1 P239P	0.240741	3	G	A	Var	Syn	HA	255	768	HA	765	P	P	HA_G768A	2119	54	0	13
97730	BALB/C	F	BALBF	1X	B	10	HA G240E	HA1 G240E	0.0197793	3	G	A	Var	Nonsyn	HA	256	770	HA	767	G	E	HA_G770A	4455	7432	2	147
9517	BALB/C	M	BALBM	4X	ABCD	10	HA L243M	HA1 L243M	0.0581435	1	C	A	Var	Nonsyn	HA	259	778	HA	775	L	M	HA_C778A	4445	2941	0	171
10299	C57BL/6	M	BL6M	1X	A	10	HA V244I	HA1 V244I	0.0184426	1	G	A	Var	Nonsyn	HA	260	781	HA	778	V	I	HA_G781A	2293	488	0	9
97760	BALB/C	F	BALBF	1X	D	10	HA N246D	HA1 N246D	0.0133936	1	A	G	Var	Nonsyn	HA	262	787	HA	784	N	D	HA_A787G	4481	5973	0	80
9517	BALB/C	M	BALBM	4X	ABCD	10	HA N246K	HA1 N246K	0.969214	1	T	G	Var	Nonsyn	HA	262	789	HA	786	N	K	HA_T789G	4403	2826	0	2739
10311	C57BL/6	F	BL6F	4X	ABCD	10	HA R255R	HA1 R255R	0.0660043	2	G	A	Var	Syn	HA	271	816	HA	813	R	R	HA_G816A	4451	1409	0	93
10304	C57BL/6	M	BL6M	1X	C	10	HA R261H	HA1 R261H	0.0320466	1	G	A	Var	Nonsyn	HA	277	833	HA	830	R	H	HA_G833A	2196	1373	3	44
97760	BALB/C	F	BALBF	1X	D	10	HA G263E	HA1 G263E	0.219317	4	G	A	Var	Nonsyn	HA	279	839	HA	836	G	E	HA_G839A	4426	6005	0	1317
97680	BALB/C	F	BALBF	1X	A	10	HA K264E	HA1 K264E	0.0100373	1	A	G	Var	Nonsyn	HA	280	841	HA	838	K	E	HA_A841G	4426	6974	2	70
9536	BALB/C	M	BALBM	1X	D	10	HA T276T	HA1 T276T	0.101695	2	C	T	Var	Syn	HA	292	879	HA	876	T	T	HA_C879T	2207	59	0	6
97760	BALB/C	F	BALBF	1X	D	10	HA S279F	HA1 S279F	0.0107375	1	C	T	Var	Nonsyn	HA	295	887	HA	884	S	F	HA_C887T	2190	3539	0	38
8539	BALB/C	M	BALBM	Stock	D	1	HA T283T	HA1 T283T	0.0426829	1	T	C	Var	Syn	HA	299	900	HA	897	T	T	HA_T900C	2191	164	1	7
9516	BALB/C	M	BALBM	2X	AB	10	HA I288M	HA1 I288M	0.0165016	1	T	G	Var	Nonsyn	HA	304	915	HA	912	I	M	HA_T915G	2101	606	0	10
9516	BALB/C	M	BALBM	2X	AB	10	HA N296S	HA1 N296S	0.105751	2	A	G	Var	Nonsyn	HA	312	938	HA	935	N	S	HA_A938G	4297	1078	1	114
10302	C57BL/6	M	BL6M	1X	B	10	HA K299K	HA1 K299K	0.202582	1	G	A	Var	Syn	HA	315	948	HA	945	K	K	HA_G948A	4327	1007	0	204
10624	BALB/C	F	BALBF	2X	CD	Test (R11)	HA A304A	HA1 A304A	0.0273973	2	A	G	Var	Syn	HA	320	963	HA	960	A	A	HA_A963G	2192	219	0	6
10313	C57BL/6	F	BL6F	2X	AB	10	HA K307K	HA1 K307K	0.0156538	1	G	A	Var	Syn	HA	323	972	HA	969	K	K	HA_G972A	2236	1086	0	17
9515	BALB/C	M	BALBM	1X	A	10	HA V309I	HA1 V309I	0.0706215	1	G	A	Var	Nonsyn	HA	325	976	HA	973	V	I	HA_G976A	2194	354	0	25
9518	BALB/C	M	BALBM	1X	B	10	HA V309V	HA1 V309V	0.025522	1	T	A	Var	Syn	HA	325	978	HA	975	V	V	HA_T978A	2030	431	0	11
10313	C57BL/6	F	BL6F	2X	AB	10	HA K310R	HA1 K310R	0.0213904	1	A	G	Var	Nonsyn	HA	326	980	HA	977	K	R	HA_A980G	2038	935	0	20
9337	BALB/C	F	BALBF	2X	CD	4	HA K310K	HA1 K310K	0.272727	1	G	A	Var	Syn	HA	326	981	HA	978	K	K	HA_G981A	2118	33	0	9
10299	C57BL/6	M	BL6M	1X	A	10	HA Q311K	HA1 Q311K	0.0211765	1	C	A	Var	Nonsyn	HA	327	982	HA	979	Q	K	HA_C982A	2119	425	1	9
97760	BALB/C	F	BALBF	1X	D	10	HA Q311L	HA1 Q311L	0.22183	4	A	T	Var	Nonsyn	HA	327	983	HA	980	Q	L	HA_A983T	4173	5671	0	1258
10311	C57BL/6	F	BL6F	4X	ABCD	10	HA N312S	HA1 N312S	0.162608	3	A	G	Var	Nonsyn	HA	328	986	HA	983	N	S	HA_A986G	4013	1273	0	207
10317	C57BL/6	F	BL6F	1X	D	10	HA L314M	HA1 L314M	0.0207715	1	C	A	Var	Nonsyn	HA	330	991	HA	988	L	M	HA_C991A	2088	674	0	14
10300	C57BL/6	M	BL6M	2X	AB	10	HA L314L	HA1 L314L	0.0236661	1	G	A	Var	Syn	HA	330	993	HA	990	L	L	HA_G993A	4113	2324	2	55
8327	C57BL/6	F	BL6F	Stock	A	1	HA K315K	HA1 K315K	0.0189521	1	G	A	Var	Syn	HA	331	996	HA	993	K	K	HA_G996A	2120	897	0	17
97830	BALB/C	F	BALBF	1X	C	10	HA T318I	HA1 T318I	0.011179	2	C	T	Var	Nonsyn	HA	334	1004	HA	1001	T	I	HA_C1004T	4057	5725	0	64
10623	BALB/C	F	BALBF	1X	C	Test (R11)	HA T318T	HA1 T318T	0.044898	1	A	C	Var	Syn	HA	334	1005	HA	1002	T	T	HA_A1005C	2087	245	0	11
9536	BALB/C	M	BALBM	1X	D	10	HA G319G	HA1 G319G	0.125	2	G	A	Var	Syn	HA	335	1008	HA	1005	G	G	HA_G1008A	1964	64	0	8
10299	C57BL/6	M	BL6M	1X	A	10	HA G319G	HA1 G319G	0.0700876	2	G	A	Var	Syn	HA	335	1008	HA	1005	G	G	HA_G1008A	4049	799	0	56
10304	C57BL/6	M	BL6M	1X	C	10	HA M320I	HA1 M320I	0.020362	1	G	A	Var	Nonsyn	HA	336	1011	HA	1008	M	I	HA_G1011A	1901	884	0	18
10314	C57BL/6	F	BL6F	1X	C	10	HA E325E	HA1 E325E	0.0120968	1	G	A	Var	Syn	HA	341	1026	HA	1023	E	E	HA_G1026A	2024	1240	0	15
10314	C57BL/6	F	BL6F	1X	C	10	HA R329K	HA2 R1K	0.0136147	1	G	A	Var	Nonsyn	HA	345	1037	HA	1034	R	K	HA_G1037A	2112	1469	0	20
97860	BALB/C	F	BALBF	2X	CD	10	HA G333G	HA2 G5G	0.010156	1	C	A	Var	Syn	HA	349	1050	HA	1047	G	G	HA_C1050A	1930	2757	0	28
9943	C57BL/6	F	BL6F	2X	CD	7	HA G337G	HA2 G9G	0.0386473	1	T	G	Var	Syn	HA	353	1062	HA	1059	G	G	HA_T1062G	1793	414	0	16
10302	C57BL/6	M	BL6M	1X	B	10	HA E340G	HA2 E12G	0.0193966	1	A	G	Var	Nonsyn	HA	356	1070	HA	1067	E	G	HA_A1070G	2198	464	0	9
10305	C57BL/6	M	BL6M	2X	CD	10	HA E340E	HA2 E12E	0.0183206	1	A	G	Var	Syn	HA	356	1071	HA	1068	E	E	HA_A1071G	2089	655	0	12
10304	C57BL/6	M	BL6M	1X	C	10	HA G342S	HA2 G14S	0.0108069	1	G	A	Var	Nonsyn	HA	358	1075	HA	1072	G	S	HA_G1075A	2272	1388	0	15
10300	C57BL/6	M	BL6M	2X	AB	10	HA I347I	HA2 I19I	0.103549	1	A	T	Var	Syn	HA	363	1092	HA	1089	I	I	HA_A1092T	4495	2733	0	283
97680	BALB/C	F	BALBF	1X	A	10	HA D348N	HA2 D20N	0.0179028	3	G	A	Var	Nonsyn	HA	364	1093	HA	1090	D	N	HA_G1093A	4501	7038	0	126
10314	C57BL/6	F	BL6F	1X	C	10	HA D348N	HA2 D20N	0.0126223	3	G	A	Var	Nonsyn	HA	364	1093	HA	1090	D	N	HA_G1093A	4501	3169	0	40
10307	C57BL/6	M	BL6M	1X	D	10	HA Y351Y	HA2 Y23Y	0.0639175	1	C	T	Var	Syn	HA	367	1104	HA	1101	Y	Y	HA_C1104T	4429	2425	3	155
9518	BALB/C	M	BALBM	1X	B	10	HA G352D	HA2 G24D	0.025878	1	G	A	Var	Nonsyn	HA	368	1106	HA	1103	G	D	HA_G1106A	2173	541	0	14
9515	BALB/C	M	BALBM	1X	A	10	HA F353F	HA2 F25F	0.0434783	1	C	T	Var	Syn	HA	369	1110	HA	1107	F	F	HA_C1110T	2154	345	0	15
10314	C57BL/6	F	BL6F	1X	C	10	HA S358P	HA2 S30P	0.0137283	3	T	C	Var	Nonsyn	HA	374	1123	HA	1120	S	P	HA_T1123C	2093	1384	0	19
8539	BALB/C	M	BALBM	Stock	D	1	HA A364A	HA2 A36A	0.0265152	1	A	T	Var	Syn	HA	380	1143	HA	1140	A	A	HA_A1143T	2431	264	0	7
10305	C57BL/6	M	BL6M	2X	CD	10	HA L367I	HA2 L39I	0.0119803	1	C	A	Var	Nonsyn	HA	383	1150	HA	1147	L	I	HA_C1150A	2421	1419	0	17
9045	C57BL/6	F	BL6F	4X	ABCD	4	HA T370T	HA2 T42T	0.0111029	1	T	C	Var	Syn	HA	386	1161	HA	1158	T	T	HA_T1161C	2360	1351	0	15
10624	BALB/C	F	BALBF	2X	CD	Test (R11)	HA I374I	HA2 I46I	0.0323625	1	C	T	Var	Syn	HA	390	1173	HA	1170	I	I	HA_C1173T	2339	618	2	20
97760	BALB/C	F	BALBF	1X	D	10	HA G379E	HA2 G51E	0.0128102	2	G	A	Var	Nonsyn	HA	395	1187	HA	1184	G	E	HA_G1187A	2378	3747	0	48
9516	BALB/C	M	BALBM	2X	AB	10	HA G379E	HA2 G51E	0.0152818	2	G	A	Var	Nonsyn	HA	395	1187	HA	1184	G	E	HA_G1187A	2378	1047	0	16
10623	BALB/C	F	BALBF	1X	C	Test (R11)	HA N382N	HA2 N54N	0.0182371	1	C	T	Var	Syn	HA	398	1197	HA	1194	N	N	HA_C1197T	2475	658	0	12
97680	BALB/C	F	BALBF	1X	A	10	HA T388M	HA2 T60M	0.012009	2	C	T	Var	Nonsyn	HA	404	1214	HA	1211	T	M	HA_C1214T	4550	7078	1	85
9536	BALB/C	M	BALBM	1X	D	10	HA T388T	HA2 T60T	0.0243446	1	G	A	Var	Syn	HA	404	1215	HA	1212	T	T	HA_G1215A	2209	534	0	13
10623	BALB/C	F	BALBF	1X	C	Test (R11)	HA E390E	HA2 E62E	0.0169731	1	G	A	Var	Syn	HA	406	1221	HA	1218	E	E	HA_G1221A	2347	707	0	12
10624	BALB/C	F	BALBF	2X	CD	Test (R11)	HA Q394Q	HA2 Q66Q	0.0266798	1	A	G	Var	Syn	HA	410	1233	HA	1230	Q	Q	HA_A1233G	2185	1012	0	27
10302	C57BL/6	M	BL6M	1X	B	10	HA I395V	HA2 I67V	0.704271	2	A	G	Var	Nonsyn	HA	411	1234	HA	1231	I	V	HA_A1234G	4515	1241	1	874
0	STOCK	STOCK	STOCK	STOCK	STOCK	STOCK	HA E396K	HA2 E68K	0.0212922	5	G	A	Var	Nonsyn	HA	412	1237	HA	1234	E	K	HA_G1237A	4521	5448	2	116
9516	BALB/C	M	BALBM	2X	AB	10	HA K397R	HA2 K69R	0.0185185	2	A	G	Var	Nonsyn	HA	413	1241	HA	1238	K	R	HA_A1241G	2174	702	1	13
8245	C57BL/6	M	BL6M	Stock	D	1	HA E398E	HA2 E70E	0.0302419	1	A	G	Var	Syn	HA	414	1245	HA	1242	E	E	HA_A1245G	2390	496	1	15
97760	BALB/C	F	BALBF	1X	D	10	HA G404E	HA2 G76E	0.0134792	1	G	A	Var	Nonsyn	HA	420	1262	HA	1259	G	E	HA_G1262A	4628	6306	1	85
9515	BALB/C	M	BALBM	1X	A	10	HA R405K	HA2 R77K	0.997949	2	G	A	Var	Nonsyn	HA	421	1265	HA	1262	R	K	HA_G1265A	4543	1463	3	1460
9500	BALB/C	M	BALBM	1X	C	10	HA R405K	HA2 R77K	0.351351	2	G	A	Var	Nonsyn	HA	421	1265	HA	1262	R	K	HA_G1265A	4543	37	3	13
10637	BALB/C	F	BALBF	2X	AB	Test (R11)	HA I406I	HA2 I78I	0.0594059	1	T	C	Var	Syn	HA	422	1269	HA	1266	I	I	HA_T1269C	2194	202	0	12
9500	BALB/C	M	BALBM	1X	C	10	HA K411E	HA2 K83E	0.821429	1	A	G	Var	Nonsyn	HA	427	1282	HA	1279	K	E	HA_A1282G	2511	28	1	23
9516	BALB/C	M	BALBM	2X	AB	10	HA V413I	HA2 V85I	0.0525533	3	G	A	Var	Nonsyn	HA	429	1288	HA	1285	V	I	HA_G1288A	4832	2017	3	106
10317	C57BL/6	F	BL6F	1X	D	10	HA V413I	HA2 V85I	0.0139373	3	G	A	Var	Nonsyn	HA	429	1288	HA	1285	V	I	HA_G1288A	2538	1435	0	20
97760	BALB/C	F	BALBF	1X	D	10	HA D419G	HA2 D91G	0.0171063	1	A	G	Var	Nonsyn	HA	435	1307	HA	1304	D	G	HA_A1307G	4631	6255	0	107
8325	C57BL/6	F	BL6F	Stock	C	1	HA L427L	HA2 L99L	0.0223464	1	T	C	Var	Syn	HA	443	1332	HA	1329	L	L	HA_T1332C	2522	358	0	8
97680	BALB/C	F	BALBF	1X	A	10	HA V429I	HA2 V101I	0.984431	7	G	A	Var	Nonsyn	HA	445	1336	HA	1333	V	I	HA_G1336A	4743	7001	1	6892
8244	C57BL/6	M	BL6M	Stock	B	1	HA V429V	HA2 V101V	0.0165563	2	C	T	Var	Syn	HA	445	1338	HA	1335	V	V	HA_C1338T	2404	604	0	10
9738	C57BL/6	F	BL6F	4X	ABCD	7	HA V429V	HA2 V101V	0.0168889	2	C	T	Var	Syn	HA	445	1338	HA	1335	V	V	HA_C1338T	2153	1125	0	19
9758	BALB/C	F	BALBF	1X	A	7	HA V429V	HA2 V101V	1	1	C	A	Var	Syn	HA	445	1338	HA	1335	V	V	HA_C1338A	2404	23	0	23
9536	BALB/C	M	BALBM	1X	D	10	HA L431L	HA2 L103L	0.0405186	1	C	T	Var	Syn	HA	447	1342	HA	1339	L	L	HA_C1342T	2175	617	0	25
10302	C57BL/6	M	BL6M	1X	B	10	HA L431P	HA2 L103P	0.013947	1	T	C	Var	Nonsyn	HA	447	1343	HA	1340	L	P	HA_T1343C	2449	717	0	10
97760	BALB/C	F	BALBF	1X	D	10	HA D438G	HA2 D110G	0.0105604	1	A	G	Var	Nonsyn	HA	454	1364	HA	1361	D	G	HA_A1364G	4559	5871	2	62
9603	BALB/C	F	BALBF	2X	CD	7	HA L439L	HA2 L111L	0.115385	2	C	T	Var	Syn	HA	455	1366	HA	1363	L	L	HA_C1366T	4663	572	4	66
9537	BALB/C	M	BALBM	2X	CD	10	HA S442S	HA2 S114S	0.0786517	1	G	A	Var	Syn	HA	458	1377	HA	1374	S	S	HA_G1377A	2354	178	0	14
10312	C57BL/6	F	BL6F	1X	B	10	HA L447L	HA2 L119L	0.0493186	3	G	T	Var	Syn	HA	463	1392	HA	1389	L	L	HA_G1392T	4374	3082	0	152
97690	BALB/C	F	BALBF	2X	AB	10	HA L447L	HA2 L119L	0.0202519	2	G	A	Var	Syn	HA	463	1392	HA	1389	L	L	HA_G1392A	4374	5876	1	119
9737	C57BL/6	F	BL6F	1X	B	7	HA L447L	HA2 L119L	0.671712	3	G	T	Var	Syn	HA	463	1392	HA	1389	L	L	HA_G1392T	4374	3634	0	2441
10637	BALB/C	F	BALBF	2X	AB	Test (R11)	HA L447L	HA2 L119L	0.0483092	2	G	A	Var	Syn	HA	463	1392	HA	1389	L	L	HA_G1392A	2097	207	0	10
9767	BALB/C	F	BALBF	1X	C	7	HA F448F	HA2 F120F	0.0172662	1	T	C	Var	Syn	HA	464	1395	HA	1392	F	F	HA_T1395C	2134	695	1	12
10304	C57BL/6	M	BL6M	1X	C	10	HA K450E	HA2 K122E	0.899276	1	A	G	Var	Nonsyn	HA	466	1399	HA	1396	K	E	HA_A1399G	4449	3038	0	2732
9334	BALB/C	F	BALBF	1X	C	4	HA K450K	HA2 K122K	0.101695	1	A	G	Var	Syn	HA	466	1401	HA	1398	K	K	HA_A1401G	2253	59	0	6
97680	BALB/C	F	BALBF	1X	A	10	HA R452K	HA2 R124K	0.999381	11	G	A	Var	Nonsyn	HA	468	1406	HA	1403	R	K	HA_G1406A	4399	6462	0	6458
10305	C57BL/6	M	BL6M	2X	CD	10	HA R452K	HA2 R124K	0.201166	11	G	A	Var	Nonsyn	HA	468	1406	HA	1403	R	K	HA_G1406A	4399	2744	0	552
97760	BALB/C	F	BALBF	1X	D	10	HA R453G	HA2 R125G	0.247588	1	A	G	Var	Nonsyn	HA	469	1408	HA	1405	R	G	HA_A1408G	4362	5598	4	1386
9518	BALB/C	M	BALBM	1X	B	10	HA R453M	HA2 R125M	0.424658	1	G	T	Var	Nonsyn	HA	469	1409	HA	1406	R	M	HA_G1409T	4327	1168	4	496
10648	BALB/C	F	BALBF	4X	ABCD	Test (R11)	HA L455L	HA2 L127L	0.0586319	5	G	A	Var	Syn	HA	471	1416	HA	1413	L	L	HA_G1416A	2279	307	0	18
97850	BALB/C	F	BALBF	4X	ABCD	10	HA L455L	HA2 L127L	0.0129948	5	G	A	Var	Syn	HA	471	1416	HA	1413	L	L	HA_G1416A	4413	6695	0	87
97760	BALB/C	F	BALBF	1X	D	10	HA R456M	HA2 R128M	0.0235874	1	G	T	Var	Nonsyn	HA	472	1418	HA	1415	R	M	HA_G1418T	4357	5681	0	134
10313	C57BL/6	F	BL6F	2X	AB	10	HA M462I	HA2 M134I	0.0154499	2	G	A	Var	Nonsyn	HA	478	1437	HA	1434	M	I	HA_G1437A	4487	3301	0	51
10312	C57BL/6	F	BL6F	1X	B	10	HA F467L	HA2 F139L	0.0199521	1	C	A	Var	Nonsyn	HA	483	1452	HA	1449	F	L	HA_C1452A	2040	1253	1	25
9536	BALB/C	M	BALBM	1X	D	10	HA C473Y	HA2 C145Y	0.0326975	1	G	A	Var	Nonsyn	HA	489	1469	HA	1466	C	Y	HA_G1469A	2264	367	0	12
10313	C57BL/6	F	BL6F	2X	AB	10	HA A476S	HA2 A148S	0.144578	2	G	T	Var	Nonsyn	HA	492	1477	HA	1474	A	S	HA_G1477T	4288	3237	0	468
10311	C57BL/6	F	BL6F	4X	ABCD	10	HA A476T	HA2 A148T	0.16926	2	G	A	Var	Nonsyn	HA	492	1477	HA	1474	A	T	HA_G1477A	4288	2635	0	446
97850	BALB/C	F	BALBF	4X	ABCD	10	HA N483D	HA2 N155D	0.701708	6	A	G	Var	Nonsyn	HA	499	1498	HA	1495	N	D	HA_A1498G	4416	6440	0	4519
97850	BALB/C	F	BALBF	4X	ABCD	10	HA N483G	HA2 N155G	0.0541993	9	A	G	Var	Nonsyn	HA	499	1499	HA	1496	N	G	HA_A1499G	4357	6513	2	353
97860	BALB/C	F	BALBF	2X	CD	10	HA N483S	HA2 N155S	0.149479	9	A	G	Var	Nonsyn	HA	499	1499	HA	1496	N	S	HA_A1499G	4357	6817	2	1019
97850	BALB/C	F	BALBF	4X	ABCD	10	HA N483E	HA2 N155E	0.0140911	5	T	G	Var	Nonsyn	HA	499	1500	HA	1497	N	E	HA_T1500G	4308	6458	1	91
10623	BALB/C	F	BALBF	1X	C	Test (R11)	HA G484G	HA2 G156G	0.0151934	1	G	A	Var	Syn	HA	500	1503	HA	1500	G	G	HA_G1503A	2250	724	0	11
97860	BALB/C	F	BALBF	2X	CD	10	HA T485A	HA2 T157A	0.0420475	4	A	G	Var	Nonsyn	HA	501	1504	HA	1501	T	A	HA_A1504G	4223	6564	0	276
9537	BALB/C	M	BALBM	2X	CD	10	HA D487N	HA2 D159N	0.0794224	3	G	A	Var	Nonsyn	HA	503	1510	HA	1507	D	N	HA_G1510A	4227	277	0	22
9500	BALB/C	M	BALBM	1X	C	10	HA V490I	HA2 V162I	0.4	1	G	A	Var	Nonsyn	HA	506	1519	HA	1516	V	I	HA_G1519A	2248	20	1	8
97850	BALB/C	F	BALBF	4X	ABCD	10	HA R499R	HA2 R171R	0.02107	9	C	A	Var	Syn	HA	515	1546	HA	1543	R	R	HA_C1546A	3427	4841	1	102
97830	BALB/C	F	BALBF	1X	C	10	HA R499R	HA2 R171R	0.0245867	9	C	A	Var	Syn	HA	515	1546	HA	1543	R	R	HA_C1546A	3427	4718	1	116
9750	BALB/C	F	BALBF	4X	ABCD	7	HA R499R	HA2 R171R	0.0679739	9	C	A	Var	Syn	HA	515	1546	HA	1543	R	R	HA_C1546A	3427	1530	1	104
10625	BALB/C	F	BALBF	4X	ABCD	Test (R11)	HA R499R	HA2 R171R	0.0727273	9	C	A	Var	Syn	HA	515	1546	HA	1543	R	R	HA_C1546A	1805	55	0	4
10623	BALB/C	F	BALBF	1X	C	Test (R11)	HA R499R	HA2 R171R	0.0437452	9	C	A	Var	Syn	HA	515	1546	HA	1543	R	R	HA_C1546A	3427	1303	1	57
10305	C57BL/6	M	BL6M	2X	CD	10	HA V505V	HA2 V177V	0.0139809	1	T	C	Var	Syn	HA	521	1566	HA	1563	V	V	HA_T1566C	1681	1359	0	19
10648	BALB/C	F	BALBF	4X	ABCD	Test (R11)	HA K508K	HA2 K180K	0.0717703	1	G	A	Var	Syn	HA	524	1575	HA	1572	K	K	HA_G1575A	1619	209	0	15
10307	C57BL/6	M	BL6M	1X	D	10	HA G510G	HA2 G182G	0.0216189	1	A	C	Var	Syn	HA	526	1581	HA	1578	G	G	HA_A1581C	3038	1989	0	43
9740	C57BL/6	F	BL6F	1X	A	7	HA K512K	HA2 K184K	0.0430108	2	A	G	Var	Syn	HA	528	1587	HA	1584	K	K	HA_A1587G	1555	186	1	8
9761	BALB/C	F	BALBF	1X	B	7	HA K512K	HA2 K184K	0.0543478	2	A	G	Var	Syn	HA	528	1587	HA	1584	K	K	HA_A1587G	1434	92	0	5
10304	C57BL/6	M	BL6M	1X	C	10	HA D513E	HA2 D185E	0.998569	2	C	A	Var	Nonsyn	HA	529	1590	HA	1587	D	E	HA_C1590A	2929	2097	0	2094
10307	C57BL/6	M	BL6M	1X	D	10	HA D513E	HA2 D185E	0.409231	2	C	A	Var	Nonsyn	HA	529	1590	HA	1587	D	E	HA_C1590A	2929	1950	0	798
10307	C57BL/6	M	BL6M	1X	D	10	HA F520L	HA2 F192L	0.259214	1	T	C	Var	Nonsyn	HA	536	1609	HA	1606	F	L	HA_T1609C	2566	1628	4	422
97860	BALB/C	F	BALBF	2X	CD	10	HA V529A	HA2 V201A	0.0190157	2	T	C	Var	Nonsyn	HA	545	1637	HA	1634	V	A	HA_T1637C	2290	3576	0	68
9759	BALB/C	F	BALBF	2X	AB	7	HA V529V	HA2 V201V	0.16	1	T	C	Var	Syn	HA	545	1638	HA	1635	V	V	HA_T1638C	1195	25	0	4
10640	BALB/C	F	BALBF	1X	D	Test (R11)	M1 L3L ; M2 L3L	M1 L3L ; M2 L3L	0.150943	2	T	C	Var	Syn; Syn	M	3; 3	9	M1; M2	9; 9	L; L	L; L	M_T9C	1890	53	2	8
8541	BALB/C	M	BALBM	Stock	C	1	M1 K35K	M1 K35K	0.0105566	2	G	A	Var	Syn	M	35	105	M1	105	K	K	M_G105A	4118	1042	0	11
9287	C57BL/6	F	BL6F	2X	CD	4	M1 K35K	M1 K35K	0.0104836	2	G	A	Var	Syn	M	35	105	M1	105	K	K	M_G105A	8581	7154	0	75
9945	C57BL/6	F	BL6F	1X	D	7	M1 P50P	M1 P50P	0.0108527	1	A	G	Var	Syn	M	50	150	M1	150	P	P	M_A150G	5335	1935	0	21
8542	BALB/C	M	BALBM	Stock	A	1	M1 P54P	M1 P54P	0.0147059	11	T	C	Var	Syn	M	54	162	M1	162	P	P	M_T162C	5623	544	1	8
9321	BALB/C	F	BALBF	1X	B	4	M1 P54P	M1 P54P	0.0190736	11	T	C	Var	Syn	M	54	162	M1	162	P	P	M_T162C	5623	367	1	7
9761	BALB/C	F	BALBF	1X	B	7	M1 P54P	M1 P54P	0.0314961	11	T	C	Var	Syn	M	54	162	M1	162	P	P	M_T162C	6179	127	0	4
9334	BALB/C	F	BALBF	1X	C	4	M1 F64F	M1 F64F	0.0622084	3	C	T	Var	Syn	M	64	192	M1	192	F	F	M_C192T	12247	643	4	40
9767	BALB/C	F	BALBF	1X	C	7	M1 F64F	M1 F64F	0.0333783	3	C	T	Var	Syn	M	64	192	M1	192	F	F	M_C192T	12247	5932	4	198
10626	BALB/C	F	BALBF	1XP	1XP	Test (R11)	M1 V68V	M1 V68V	0.0199161	1	G	A	Var	Syn	M	68	204	M1	204	V	V	M_G204A	7124	954	2	19
9321	BALB/C	F	BALBF	1X	B	4	M1 P69P	M1 P69P	0.0359712	2	C	T	Var	Syn	M	69	207	M1	207	P	P	M_C207T	6605	417	1	15
9500	BALB/C	M	BALBM	1X	C	10	M1 L74L	M1 L74L	0.0930233	1	G	A	Var	Syn	M	74	222	M1	222	L	L	M_G222A	7508	43	2	4
9333	BALB/C	F	BALBF	4X	ABCD	4	M1 R78R	M1 R78R	0.0351438	1	C	A	Var	Syn	M	78	234	M1	234	R	R	M_C234A	6541	313	0	11
10648	BALB/C	F	BALBF	4X	ABCD	Test (R11)	M1 G86G	M1 G86G	0.010396	2	G	A	Var	Syn	M	86	258	M1	258	G	G	M_G258A	6873	2020	2	21
8547	BALB/C	M	BALBM	Stock	B	1	M1 R95R	M1 R95R	0.0112755	1	A	C	Var	Syn	M	95	283	M1	283	R	R	M_A283C	7255	1419	0	16
0	STOCK	STOCK	STOCK	STOCK	STOCK	STOCK	M1 V97I	M1 V97I	0.00995633	9	G	A	Var	Nonsyn	M	97	289	M1	289	V	I	M_G289A	14379	11450	3	114
9516	BALB/C	M	BALBM	2X	AB	10	M1 K98K	M1 K98K	0.0118299	1	A	G	Var	Syn	M	98	294	M1	294	K	K	M_A294G	14124	10820	4	128
9518	BALB/C	M	BALBM	1X	B	10	M1 L99L	M1 L99L	0.0158562	1	G	T	Var	Syn	M	99	297	M1	297	L	L	M_G297T	7490	2838	0	45
10314	C57BL/6	F	BL6F	1X	C	10	M1 L99L	M1 L99L	0.0106423	3	G	A	Var	Syn	M	99	297	M1	297	L	L	M_G297A	14415	15880	3	169
9334	BALB/C	F	BALBF	1X	C	4	M1 Y100Y	M1 Y100Y	0.027027	4	T	C	Var	Syn	M	100	300	M1	300	Y	Y	M_T300C	7437	333	0	9
9516	BALB/C	M	BALBM	2X	AB	10	M1 R101R	M1 R101R	0.0116943	1	A	G	Var	Syn	M	101	303	M1	303	R	R	M_A303G	14281	10860	0	127
10311	C57BL/6	F	BL6F	4X	ABCD	10	M1 L103L	M1 L103L	0.13574	2	T	C	Var	Syn	M	103	309	M1	309	L	L	M_T309C	14377	15235	2	2068
10648	BALB/C	F	BALBF	4X	ABCD	Test (R11)	M1 E106E	M1 E106E	0.0243764	6	G	A	Var	Syn	M	106	318	M1	318	E	E	M_G318A	7607	1764	2	43
9459	C57BL/6	F	BL6F	1X	D	4	M1 H110H	M1 H110H	0.520408	4	T	C	Var	Syn	M	110	330	M1	330	H	H	M_T330C	14523	784	4	408
9945	C57BL/6	F	BL6F	1X	D	7	M1 H110H	M1 H110H	0.0318091	4	T	C	Var	Syn	M	110	330	M1	330	H	H	M_T330C	14523	4527	4	144
10637	BALB/C	F	BALBF	2X	AB	Test (R11)	M1 H110H	M1 H110H	0.0121609	4	T	C	Var	Syn	M	110	330	M1	330	H	H	M_T330C	7641	2138	0	26
9603	BALB/C	F	BALBF	2X	CD	7	M1 G111G	M1 G111G	0.0162338	1	G	A	Var	Syn	M	111	333	M1	333	G	G	M_G333A	7344	1232	1	20
9945	C57BL/6	F	BL6F	1X	D	7	M1 K113K	M1 K113K	0.0105587	4	A	G	Var	Syn	M	113	339	M1	339	K	K	M_A339G	7613	2273	1	24
9316	BALB/C	F	BALBF	2X	AB	4	M1 S120S	M1 S120S	0.0530973	2	T	C	Var	Syn	M	120	360	M1	360	S	S	M_T360C	6920	113	1	6
97830	BALB/C	F	BALBF	1X	C	10	M1 S126C	M1 S126C	0.0169631	4	A	T	Var	Nonsyn	M	126	376	M1	376	S	C	M_A376T	14648	13323	1	226
8245	C57BL/6	M	BL6M	Stock	D	1	M1 L130L	M1 L130L	0.031455	3	C	A	Var	Syn	M	130	390	M1	390	L	L	M_C390A	15014	5182	0	163
10009	C57BL/6	M	BL6M	4X	ABCD	10	M1 L130L	M1 L130L	0.329941	3	C	A	Var	Syn	M	130	390	M1	390	L	L	M_C390A	15014	10611	0	3501
97830	BALB/C	F	BALBF	1X	C	10	M1 R134R	M1 R134R	0.0163994	9	G	A	Var	Syn	M	134	402	M1	402	R	R	M_G402A	15171	13659	0	224
10623	BALB/C	F	BALBF	1X	C	Test (R11)	M1 R134R	M1 R134R	0.00686257	9	G	A	Var	Syn	M	134	402	M1	402	R	R	M_G402A	15171	11366	0	78
10649	BALB/C	F	BALBF	1XP	1XP	Test (R11)	M1 R134R	M1 R134R	0.011636	9	G	A	Var	Syn	M	134	402	M1	402	R	R	M_G402A	15171	5758	0	67
9516	BALB/C	M	BALBM	2X	AB	10	M1 A137T	M1 A137T	0.0362273	4	G	A	Var	Nonsyn	M	137	409	M1	409	A	T	M_G409A	14902	11069	8	401
9537	BALB/C	M	BALBM	2X	CD	10	M1 A137D	M1 A137D	0.0254403	1	C	A	Var	Nonsyn	M	137	410	M1	410	A	D	M_C410A	6977	511	1	13
9943	C57BL/6	F	BL6F	2X	CD	7	M1 L146L	M1 L146L	0.0186693	10	G	A	Var	Syn	M	146	438	M1	438	L	L	M_G438A	15710	10070	4	188
8542	BALB/C	M	BALBM	Stock	A	1	M1 V147V	M1 V147V	0.0142653	2	A	G	Var	Syn	M	147	441	M1	441	V	V	M_A441G	8161	701	1	10
9315	BALB/C	F	BALBF	1X	A	4	M1 C148C	M1 C148C	0.0416667	2	T	C	Var	Syn	M	148	444	M1	444	C	C	M_T444C	8088	528	6	22
9500	BALB/C	M	BALBM	1X	C	10	M1 C148C	M1 C148C	0.0405405	2	T	C	Var	Syn	M	148	444	M1	444	C	C	M_T444C	7260	148	3	6
9537	BALB/C	M	BALBM	2X	CD	10	M1 H159H	M1 H159H	0.0410959	2	T	C	Var	Syn	M	159	477	M1	477	H	H	M_T477C	7277	511	0	21
9500	BALB/C	M	BALBM	1X	C	10	M1 S161P	M1 S161P	0.0378788	2	T	C	Var	Nonsyn	M	161	481	M1	481	S	P	M_T481C	6630	132	5	5
9500	BALB/C	M	BALBM	1X	C	10	M1 S161S	M1 S161S	0.0797872	5	T	C	Var	Syn	M	161	483	M1	483	S	S	M_T483C	14501	188	15	15
10220	C57BL/6	F	BL6F	2X	CD	10	M1 S161S	M1 S161S	0.0394164	2	T	A	Var	Syn	M	161	483	M1	483	S	S	M_T483A	14501	13776	0	543
9943	C57BL/6	F	BL6F	2X	CD	7	M1 S161S	M1 S161S	0.0199651	2	T	A	Var	Syn	M	161	483	M1	483	S	S	M_T483A	14501	9166	0	183
97730	BALB/C	F	BALBF	1X	B	10	M1 Q164R	M1 Q164R	0.0254931	7	A	G	Var	Nonsyn	M	164	491	M1	491	Q	R	M_A491G	14819	14043	3	358
9516	BALB/C	M	BALBM	2X	AB	10	M1 Q164R	M1 Q164R	0.0269628	7	A	G	Var	Nonsyn	M	164	491	M1	491	Q	R	M_A491G	14819	10941	3	295
10623	BALB/C	F	BALBF	1X	C	Test (R11)	M1 V166V	M1 V166V	0.0110962	1	G	A	Var	Syn	M	166	498	M1	498	V	V	M_G498A	6995	5227	2	58
97860	BALB/C	F	BALBF	2X	CD	10	M1 T167A	M1 T167A	0.0343012	3	A	G	Var	Nonsyn	M	167	499	M1	499	T	A	M_A499G	14591	14431	14	495
9315	BALB/C	F	BALBF	1X	A	4	M1 T167T	M1 T167T	0.0179104	2	A	G	Var	Syn	M	167	501	M1	501	T	T	M_A501G	7115	335	1	6
10626	BALB/C	F	BALBF	1XP	1XP	Test (R11)	M1 T167T	M1 T167T	0.0160681	2	A	G	Var	Syn	M	167	501	M1	501	T	T	M_A501G	7115	1058	1	17
9334	BALB/C	F	BALBF	1X	C	4	M1 T169T	M1 T169T	0.0407407	3	C	T	Var	Syn	M	169	507	M1	507	T	T	M_C507T	7615	270	0	11
9315	BALB/C	F	BALBF	1X	A	4	M1 V180V	M1 V180V	0.0146628	4	T	C	Var	Syn	M	180	540	M1	540	V	V	M_T540C	6918	341	0	5
10624	BALB/C	F	BALBF	2X	CD	Test (R11)	M1 L181L	M1 L181L	0.0248905	3	G	A	Var	Syn	M	181	543	M1	543	L	L	M_G543A	14880	10727	2	267
10626	BALB/C	F	BALBF	1XP	1XP	Test (R11)	M1 L181L	M1 L181L	0.0166667	3	G	A	Var	Syn	M	181	543	M1	543	L	L	M_G543A	7227	1080	0	18
10299	C57BL/6	M	BL6M	1X	A	10	M1 A182A	M1 A182A	0.0200957	1	C	A	Var	Syn	M	182	546	M1	546	A	A	M_C546A	14808	9405	0	189
9945	C57BL/6	F	BL6F	1X	D	7	M1 T184T	M1 T184T	0.0104261	2	T	C	Var	Syn	M	184	552	M1	552	T	T	M_T552C	7646	2206	1	23
10637	BALB/C	F	BALBF	2X	AB	Test (R11)	M1 A186A	M1 A186A	0.0121892	2	T	C	Var	Syn	M	186	558	M1	558	A	A	M_T558C	7659	2051	2	25
10304	C57BL/6	M	BL6M	1X	C	10	M1 K187K	M1 K187K	0.0611441	1	G	A	Var	Syn	M	187	561	M1	561	K	K	M_G561A	15093	15488	4	947
9761	BALB/C	F	BALBF	1X	B	7	M1 A188A	M1 A188A	0.0295858	1	T	C	Var	Syn	M	188	564	M1	564	A	A	M_T564C	7093	169	1	5
9536	BALB/C	M	BALBM	1X	D	10	M1 S196G	M1 S196G	0.0148113	1	A	G	Var	Nonsyn	M	196	586	M1	586	S	G	M_A586G	6388	2093	4	31
97850	BALB/C	F	BALBF	4X	ABCD	10	M1 Q198R	M1 Q198R	0.174163	7	A	G	Var	Nonsyn	M	198	593	M1	593	Q	R	M_A593G	14298	13206	8	2300
9537	BALB/C	M	BALBM	2X	CD	10	M1 Q198Q	M1 Q198Q	0.0516934	10	G	A	Var	Syn	M	198	594	M1	594	Q	Q	M_G594A	7009	561	1	29
10304	C57BL/6	M	BL6M	1X	C	10	M1 Q198Q	M1 Q198Q	0.0294602	10	G	A	Var	Syn	M	198	594	M1	594	Q	Q	M_G594A	14462	15173	1	447
97830	BALB/C	F	BALBF	1X	C	10	M1 Q198Q	M1 Q198Q	0.0531223	10	G	A	Var	Syn	M	198	594	M1	594	Q	Q	M_G594A	14462	12763	1	678
9767	BALB/C	F	BALBF	1X	C	7	M1 Q198Q	M1 Q198Q	0.0121128	10	G	A	Var	Syn	M	198	594	M1	594	Q	Q	M_G594A	14462	6522	1	79
10623	BALB/C	F	BALBF	1X	C	Test (R11)	M1 Q198Q	M1 Q198Q	0.06166	10	G	A	Var	Syn	M	198	594	M1	594	Q	Q	M_G594A	14462	11012	1	679
10724	C57BL/6	F	BALBF	1XP	1XP	Test (R11)	M1 Q198Q	M1 Q198Q	0.0102153	10	G	A	Var	Syn	M	198	594	M1	594	Q	Q	M_G594A	14462	19187	1	196
9536	BALB/C	M	BALBM	1X	D	10	M1 A202A	M1 A202A	0.0101954	2	C	T	Var	Syn	M	202	606	M1	606	A	A	M_C606T	6919	2354	1	24
9334	BALB/C	F	BALBF	1X	C	4	M1 E204E	M1 E204E	0.0213523	5	G	A	Var	Syn	M	204	612	M1	612	E	E	M_G612A	7388	281	1	6
97830	BALB/C	F	BALBF	1X	C	10	M1 E204E	M1 E204E	0.0184992	5	G	A	Var	Syn	M	204	612	M1	612	E	E	M_G612A	14284	12487	1	231
10623	BALB/C	F	BALBF	1X	C	Test (R11)	M1 E204E	M1 E204E	0.0195718	5	G	A	Var	Syn	M	204	612	M1	612	E	E	M_G612A	14284	10883	1	213
9518	BALB/C	M	BALBM	1X	B	10	M1 S207C	M1 S207C	0.0115315	1	A	T	Var	Nonsyn	M	207	619	M1	619	S	C	M_A619T	7408	2775	0	32
9537	BALB/C	M	BALBM	2X	CD	10	M1 S207N	M1 S207N	0.0745763	9	G	A	Var	Nonsyn	M	207	620	M1	620	S	N	M_G620A	7495	295	0	22
10648	BALB/C	F	BALBF	4X	ABCD	Test (R11)	M1 S207S	M1 S207S	0.0128999	4	T	C	Var	Syn	M	207	621	M1	621	S	S	M_T621C	6764	1938	2	25
9518	BALB/C	M	BALBM	1X	B	10	M1 Q208R	M1 Q208R	0.0173724	1	A	G	Var	Nonsyn	M	208	623	M1	623	Q	R	M_A623G	7335	2763	7	48
9537	BALB/C	M	BALBM	2X	CD	10	M1 Q211Q	M1 Q211Q	0.0236088	1	A	G	Var	Syn	M	211	633	M1	633	Q	Q	M_A633G	6781	593	0	14
9515	BALB/C	M	BALBM	1X	A	10	M1 V213V	M1 V213V	0.0253312	1	G	A	Var	Syn	M	213	639	M1	639	V	V	M_G639A	13763	6869	7	174
97850	BALB/C	F	BALBF	4X	ABCD	10	M1 S224R	M1 S224R	0.0101372	6	C	A	Var	Nonsyn	M	224	672	M1	672	S	R	M_C672A	14505	13120	3	133
8547	BALB/C	M	BALBM	Stock	B	1	M1 S226S	M1 S226S	0.0103026	1	T	C	Var	Syn	M	226	678	M1	678	S	S	M_T678C	6588	1553	0	16
97850	BALB/C	F	BALBF	4X	ABCD	10	M1 D231N	M1 D231N	0.016779	8	G	A	Var	Nonsyn	M	231	691	M1	691	D	N	M_G691A	14503	13052	2	219
9536	BALB/C	M	BALBM	1X	D	10	M1 D231N	M1 D231N	0.0142985	8	G	A	Var	Nonsyn	M	231	691	M1	691	D	N	M_G691A	7521	2238	0	32
9536	BALB/C	M	BALBM	1X	D	10	M1 D232N	M1 D232N	0.0126738	2	G	A	Var	Nonsyn	M	232	694	M1	694	D	N	M_G694A	6965	2446	0	31
10648	BALB/C	F	BALBF	4X	ABCD	Test (R11)	M1 D232D	M1 D232D	0.0183534	3	T	C	Var	Syn	M	232	696	M1	696	D	D	M_T696C	7427	1907	3	35
9518	BALB/C	M	BALBM	1X	B	10	M1 E235G	M1 E235G	0.0116279	2	A	G	Var	Nonsyn	M	235	704	M1	704	E	G	M_A704G	14431	6794	3	79
10313	C57BL/6	F	BL6F	2X	AB	10	M1 R243R ; M2 E14G	M1 R243R ; M2 E14G	0.352048	3	A	G	Var	Syn; Nonsyn	M	243; 14	729	M1; M2	729; 41	R; E	R; G	M_A729G	14310	17972	2	6327
9536	BALB/C	M	BALBM	1X	D	10	M1 M248I ; M2 C19F	M1 M248I ; M2 C19F	0.0156722	1	G	T	Var	Nonsyn; Nonsyn	M	248; 19	744	M1; M2	744; 56	M; C	I; F	M_G744T	14517	5296	1	83
9740	C57BL/6	F	BL6F	1X	A	7	M2 P25P	M2 P25P	0.014738	2	T	C	Var	Syn	M	25	763	M2	75	P	P	M_T763C	7731	1832	15	27
10626	BALB/C	F	BALBF	1XP	1XP	Test (R11)	M2 V27V	M2 V27V	0.0104754	1	T	C	Var	Syn	M	27	769	M2	81	V	V	M_T769C	7605	1241	0	13
8542	BALB/C	M	BALBM	Stock	A	1	M2 A30A	M2 A30A	0.0283822	1	G	A	Var	Syn	M	30	778	M2	90	A	A	M_G778A	7269	1057	0	30
97830	BALB/C	F	BALBF	1X	C	10	M2 L38L	M2 L38L	0.0111871	3	G	A	Var	Syn	M	38	802	M2	114	L	L	M_G802A	12926	11263	1	126
10623	BALB/C	F	BALBF	1X	C	Test (R11)	M2 L38L	M2 L38L	0.00840938	3	G	A	Var	Syn	M	38	802	M2	114	L	L	M_G802A	12926	11178	1	94
9536	BALB/C	M	BALBM	1X	D	10	M2 L40V	M2 L40V	0.0228426	1	T	G	Var	Nonsyn	M	40	806	M2	118	L	V	M_T806G	6492	2364	0	54
9750	BALB/C	F	BALBF	4X	ABCD	7	M2 I42I	M2 I42I	0.0105494	6	T	C	Var	Syn	M	42	814	M2	126	I	I	M_T814C	6205	5024	1	53
10304	C57BL/6	M	BL6M	1X	C	10	M2 L43F	M2 L43F	0.464507	1	C	T	Var	Nonsyn	M	43	815	M2	127	L	F	M_C815T	12021	12904	3	5994
97860	BALB/C	F	BALBF	2X	CD	10	M2 R45R	M2 R45R	0.0158536	3	T	C	Var	Syn	M	45	823	M2	135	R	R	M_T823C	11474	11417	12	181
10624	BALB/C	F	BALBF	2X	CD	Test (R11)	M2 R45R	M2 R45R	0.0172524	3	T	C	Var	Syn	M	45	823	M2	135	R	R	M_T823C	11474	9390	12	162
9516	BALB/C	M	BALBM	2X	AB	10	M2 F48S	M2 F48S	0.0107056	3	T	C	Var	Nonsyn	M	48	831	M2	143	F	S	M_T831C	5560	4110	3	44
8542	BALB/C	M	BALBM	Stock	A	1	M2 K49K	M2 K49K	0.0167364	1	A	G	Var	Syn	M	49	835	M2	147	K	K	M_A835G	5909	956	0	16
9515	BALB/C	M	BALBM	1X	A	10	M2 I51L	M2 I51L	0.0192249	1	A	C	Var	Nonsyn	M	51	839	M2	151	I	L	M_A839C	11453	6606	0	127
0	STOCK	STOCK	STOCK	STOCK	STOCK	STOCK	M2 Y52Y	M2 Y52Y	0.0842993	86	T	C	Var	Syn	M	52	844	M2	156	Y	Y	M_T844C	11250	8541	0	720
8235	C57BL/6	M	BL6M	Stock	C	1	M2 Y52Y	M2 Y52Y	0.170073	86	T	C	Var	Syn	M	52	844	M2	156	Y	Y	M_T844C	11250	10031	0	1706
8244	C57BL/6	M	BL6M	Stock	B	1	M2 Y52Y	M2 Y52Y	0.156369	86	T	C	Var	Syn	M	52	844	M2	156	Y	Y	M_T844C	11250	7105	0	1111
8278	C57BL/6	M	BL6M	Stock	A	1	M2 Y52Y	M2 Y52Y	0.167858	86	T	C	Var	Syn	M	52	844	M2	156	Y	Y	M_T844C	11250	13571	0	2278
8312	C57BL/6	F	BL6F	Stock	D	1	M2 Y52Y	M2 Y52Y	0.172444	86	T	C	Var	Syn	M	52	844	M2	156	Y	Y	M_T844C	11250	11308	0	1950
8326	C57BL/6	F	BL6F	Stock	B	1	M2 Y52Y	M2 Y52Y	0.187547	86	T	C	Var	Syn	M	52	844	M2	156	Y	Y	M_T844C	11250	2634	0	494
8327	C57BL/6	F	BL6F	Stock	A	1	M2 Y52Y	M2 Y52Y	0.139539	86	T	C	Var	Syn	M	52	844	M2	156	Y	Y	M_T844C	11250	11925	0	1664
8539	BALB/C	M	BALBM	Stock	D	1	M2 Y52Y	M2 Y52Y	0.171927	86	T	C	Var	Syn	M	52	844	M2	156	Y	Y	M_T844C	11250	3897	0	670
8541	BALB/C	M	BALBM	Stock	C	1	M2 Y52Y	M2 Y52Y	0.212639	86	T	C	Var	Syn	M	52	844	M2	156	Y	Y	M_T844C	11250	2516	0	535
8542	BALB/C	M	BALBM	Stock	A	1	M2 Y52Y	M2 Y52Y	0.162014	86	T	C	Var	Syn	M	52	844	M2	156	Y	Y	M_T844C	11250	1827	0	296
8547	BALB/C	M	BALBM	Stock	B	1	M2 Y52Y	M2 Y52Y	0.280899	86	T	C	Var	Syn	M	52	844	M2	156	Y	Y	M_T844C	11250	3293	0	925
8598	BALB/C	F	BALBF	Stock	A	1	M2 Y52Y	M2 Y52Y	0.100592	86	T	C	Var	Syn	M	52	844	M2	156	Y	Y	M_T844C	11250	169	0	17
8600	BALB/C	F	BALBF	Stock	C	1	M2 Y52Y	M2 Y52Y	0.243202	86	T	C	Var	Syn	M	52	844	M2	156	Y	Y	M_T844C	11250	662	0	161
9045	C57BL/6	F	BL6F	4X	ABCD	4	M2 Y52Y	M2 Y52Y	0.631124	86	T	C	Var	Syn	M	52	844	M2	156	Y	Y	M_T844C	11250	11226	0	7085
9287	C57BL/6	F	BL6F	2X	CD	4	M2 Y52Y	M2 Y52Y	0.0811746	86	T	C	Var	Syn	M	52	844	M2	156	Y	Y	M_T844C	11250	9535	0	774
9293	C57BL/6	F	BL6F	1X	A	4	M2 Y52Y	M2 Y52Y	0.434625	86	T	C	Var	Syn	M	52	844	M2	156	Y	Y	M_T844C	11250	11281	0	4903
9296	C57BL/6	F	BL6F	1X	B	4	M2 Y52Y	M2 Y52Y	0.904314	86	T	C	Var	Syn	M	52	844	M2	156	Y	Y	M_T844C	11250	11266	0	10188
9297	C57BL/6	F	BL6F	2X	AB	4	M2 Y52Y	M2 Y52Y	0.892173	86	T	C	Var	Syn	M	52	844	M2	156	Y	Y	M_T844C	11250	11843	0	10566
9315	BALB/C	F	BALBF	1X	A	4	M2 Y52Y	M2 Y52Y	0.0974605	86	T	C	Var	Syn	M	52	844	M2	156	Y	Y	M_T844C	11250	1457	0	142
9316	BALB/C	F	BALBF	2X	AB	4	M2 Y52Y	M2 Y52Y	0.584337	86	T	C	Var	Syn	M	52	844	M2	156	Y	Y	M_T844C	11250	332	0	194
9321	BALB/C	F	BALBF	1X	B	4	M2 Y52Y	M2 Y52Y	0.390584	86	T	C	Var	Syn	M	52	844	M2	156	Y	Y	M_T844C	11250	1508	0	589
9333	BALB/C	F	BALBF	4X	ABCD	4	M2 Y52Y	M2 Y52Y	0.234664	86	T	C	Var	Syn	M	52	844	M2	156	Y	Y	M_T844C	11250	1027	0	241
9334	BALB/C	F	BALBF	1X	C	4	M2 Y52Y	M2 Y52Y	0.737637	86	T	C	Var	Syn	M	52	844	M2	156	Y	Y	M_T844C	11250	728	0	537
9337	BALB/C	F	BALBF	2X	CD	4	M2 Y52Y	M2 Y52Y	0.841096	86	T	C	Var	Syn	M	52	844	M2	156	Y	Y	M_T844C	11250	1460	0	1228
9339	BALB/C	F	BALBF	1X	D	4	M2 Y52Y	M2 Y52Y	0.715976	86	T	C	Var	Syn	M	52	844	M2	156	Y	Y	M_T844C	11250	338	0	242
9459	C57BL/6	F	BL6F	1X	D	4	M2 Y52Y	M2 Y52Y	0.4375	86	T	C	Var	Syn	M	52	844	M2	156	Y	Y	M_T844C	5450	480	0	210
9500	BALB/C	M	BALBM	1X	C	10	M2 Y52Y	M2 Y52Y	1	86	T	C	Var	Syn	M	52	844	M2	156	Y	Y	M_T844C	11250	432	0	432
9515	BALB/C	M	BALBM	1X	A	10	M2 Y52Y	M2 Y52Y	0.998565	86	T	C	Var	Syn	M	52	844	M2	156	Y	Y	M_T844C	11250	6272	0	6263
9516	BALB/C	M	BALBM	2X	AB	10	M2 Y52Y	M2 Y52Y	0.95789	86	T	C	Var	Syn	M	52	844	M2	156	Y	Y	M_T844C	11250	8739	0	8371
9518	BALB/C	M	BALBM	1X	B	10	M2 Y52Y	M2 Y52Y	0.975327	86	T	C	Var	Syn	M	52	844	M2	156	Y	Y	M_T844C	11250	5512	0	5376
9536	BALB/C	M	BALBM	1X	D	10	M2 Y52Y	M2 Y52Y	0.4645	86	T	C	Var	Syn	M	52	844	M2	156	Y	Y	M_T844C	11250	4493	0	2087
9537	BALB/C	M	BALBM	2X	CD	10	M2 Y52Y	M2 Y52Y	0.959436	86	T	C	Var	Syn	M	52	844	M2	156	Y	Y	M_T844C	11250	1134	0	1088
9517	BALB/C	M	BALBM	4X	ABCD	10	M2 Y52Y	M2 Y52Y	0.895938	86	T	C	Var	Syn	M	52	844	M2	156	Y	Y	M_T844C	11250	13540	0	12131
10311	C57BL/6	F	BL6F	4X	ABCD	10	M2 Y52Y	M2 Y52Y	0.99121	86	T	C	Var	Syn	M	52	844	M2	156	Y	Y	M_T844C	11250	11831	0	11727
97850	BALB/C	F	BALBF	4X	ABCD	10	M2 Y52Y	M2 Y52Y	0.716596	86	T	C	Var	Syn	M	52	844	M2	156	Y	Y	M_T844C	11250	10081	0	7224
10220	C57BL/6	F	BL6F	2X	CD	10	M2 Y52Y	M2 Y52Y	0.528994	86	T	C	Var	Syn	M	52	844	M2	156	Y	Y	M_T844C	11250	10571	0	5592
10299	C57BL/6	M	BL6M	1X	A	10	M2 Y52Y	M2 Y52Y	0.99905	86	T	C	Var	Syn	M	52	844	M2	156	Y	Y	M_T844C	11250	7372	0	7365
10304	C57BL/6	M	BL6M	1X	C	10	M2 Y52Y	M2 Y52Y	0.999294	86	T	C	Var	Syn	M	52	844	M2	156	Y	Y	M_T844C	11250	11332	0	11324
10305	C57BL/6	M	BL6M	2X	CD	10	M2 Y52Y	M2 Y52Y	0.999191	86	T	C	Var	Syn	M	52	844	M2	156	Y	Y	M_T844C	11250	13590	0	13579
10307	C57BL/6	M	BL6M	1X	D	10	M2 Y52Y	M2 Y52Y	0.681229	86	T	C	Var	Syn	M	52	844	M2	156	Y	Y	M_T844C	11250	9568	0	6518
10309	C57BL/6	F	BL6F	1X	A	10	M2 Y52Y	M2 Y52Y	1	86	T	C	Var	Syn	M	52	844	M2	156	Y	Y	M_T844C	11250	11900	0	11900
10312	C57BL/6	F	BL6F	1X	B	10	M2 Y52Y	M2 Y52Y	0.463215	86	T	C	Var	Syn	M	52	844	M2	156	Y	Y	M_T844C	11250	12342	0	5717
10313	C57BL/6	F	BL6F	2X	AB	10	M2 Y52Y	M2 Y52Y	0.999773	86	T	C	Var	Syn	M	52	844	M2	156	Y	Y	M_T844C	11250	13198	0	13195
10317	C57BL/6	F	BL6F	1X	D	10	M2 Y52Y	M2 Y52Y	0.998925	86	T	C	Var	Syn	M	52	844	M2	156	Y	Y	M_T844C	11250	9303	0	9293
97680	BALB/C	F	BALBF	1X	A	10	M2 Y52Y	M2 Y52Y	0.566606	86	T	C	Var	Syn	M	52	844	M2	156	Y	Y	M_T844C	11250	10427	0	5908
97690	BALB/C	F	BALBF	2X	AB	10	M2 Y52Y	M2 Y52Y	0.841158	86	T	C	Var	Syn	M	52	844	M2	156	Y	Y	M_T844C	11250	9223	0	7758
97730	BALB/C	F	BALBF	1X	B	10	M2 Y52Y	M2 Y52Y	0.887888	86	T	C	Var	Syn	M	52	844	M2	156	Y	Y	M_T844C	11250	10106	0	8973
97760	BALB/C	F	BALBF	1X	D	10	M2 Y52Y	M2 Y52Y	0.99966	86	T	C	Var	Syn	M	52	844	M2	156	Y	Y	M_T844C	11250	8824	0	8821
97830	BALB/C	F	BALBF	1X	C	10	M2 Y52Y	M2 Y52Y	0.84464	86	T	C	Var	Syn	M	52	844	M2	156	Y	Y	M_T844C	11250	9449	0	7981
97860	BALB/C	F	BALBF	2X	CD	10	M2 Y52Y	M2 Y52Y	0.822067	86	T	C	Var	Syn	M	52	844	M2	156	Y	Y	M_T844C	11250	10858	0	8926
9603	BALB/C	F	BALBF	2X	CD	7	M2 Y52Y	M2 Y52Y	0.925773	86	T	C	Var	Syn	M	52	844	M2	156	Y	Y	M_T844C	11250	3139	0	2906
9737	C57BL/6	F	BL6F	1X	B	7	M2 Y52Y	M2 Y52Y	0.915363	86	T	C	Var	Syn	M	52	844	M2	156	Y	Y	M_T844C	11250	13292	0	12167
9738	C57BL/6	F	BL6F	4X	ABCD	7	M2 Y52Y	M2 Y52Y	0.78322	86	T	C	Var	Syn	M	52	844	M2	156	Y	Y	M_T844C	11250	9881	0	7739
9739	C57BL/6	F	BL6F	2X	AB	7	M2 Y52Y	M2 Y52Y	0.999464	86	T	C	Var	Syn	M	52	844	M2	156	Y	Y	M_T844C	11250	13067	0	13060
9740	C57BL/6	F	BL6F	1X	A	7	M2 Y52Y	M2 Y52Y	0.953785	86	T	C	Var	Syn	M	52	844	M2	156	Y	Y	M_T844C	11250	2272	0	2167
9750	BALB/C	F	BALBF	4X	ABCD	7	M2 Y52Y	M2 Y52Y	0.412361	86	T	C	Var	Syn	M	52	844	M2	156	Y	Y	M_T844C	11250	9562	0	3943
9758	BALB/C	F	BALBF	1X	A	7	M2 Y52Y	M2 Y52Y	0.597701	86	T	C	Var	Syn	M	52	844	M2	156	Y	Y	M_T844C	11250	174	0	104
9759	BALB/C	F	BALBF	2X	AB	7	M2 Y52Y	M2 Y52Y	0.658986	86	T	C	Var	Syn	M	52	844	M2	156	Y	Y	M_T844C	11250	868	0	572
9761	BALB/C	F	BALBF	1X	B	7	M2 Y52Y	M2 Y52Y	0.818182	86	T	C	Var	Syn	M	52	844	M2	156	Y	Y	M_T844C	11250	1221	0	999
9767	BALB/C	F	BALBF	1X	C	7	M2 Y52Y	M2 Y52Y	0.668766	86	T	C	Var	Syn	M	52	844	M2	156	Y	Y	M_T844C	11250	6035	0	4036
10625	BALB/C	F	BALBF	4X	ABCD	Test (R11)	M2 Y52Y	M2 Y52Y	0.613772	86	T	C	Var	Syn	M	52	844	M2	156	Y	Y	M_T844C	11250	334	0	205
10648	BALB/C	F	BALBF	4X	ABCD	Test (R11)	M2 Y52Y	M2 Y52Y	0.649037	86	T	C	Var	Syn	M	52	844	M2	156	Y	Y	M_T844C	11250	4519	0	2933
9873	BALB/C	F	BALBF	1X	D	7	M2 Y52Y	M2 Y52Y	0.777778	86	T	C	Var	Syn	M	52	844	M2	156	Y	Y	M_T844C	5800	9	0	7
9943	C57BL/6	F	BL6F	2X	CD	7	M2 Y52Y	M2 Y52Y	0.506835	86	T	C	Var	Syn	M	52	844	M2	156	Y	Y	M_T844C	11250	7608	0	3856
9945	C57BL/6	F	BL6F	1X	D	7	M2 Y52Y	M2 Y52Y	0.920657	86	T	C	Var	Syn	M	52	844	M2	156	Y	Y	M_T844C	11250	3592	0	3307
10623	BALB/C	F	BALBF	1X	C	Test (R11)	M2 Y52Y	M2 Y52Y	0.830004	86	T	C	Var	Syn	M	52	844	M2	156	Y	Y	M_T844C	11250	9512	0	7895
10624	BALB/C	F	BALBF	2X	CD	Test (R11)	M2 Y52Y	M2 Y52Y	0.89581	86	T	C	Var	Syn	M	52	844	M2	156	Y	Y	M_T844C	11250	8926	0	7996
10626	BALB/C	F	BALBF	1XP	1XP	Test (R11)	M2 Y52Y	M2 Y52Y	0.827756	86	T	C	Var	Syn	M	52	844	M2	156	Y	Y	M_T844C	11250	2032	0	1682
10627	BALB/C	F	BALBF	1X	B	Test (R11)	M2 Y52Y	M2 Y52Y	0.993789	86	T	C	Var	Syn	M	52	844	M2	156	Y	Y	M_T844C	11250	161	0	160
10637	BALB/C	F	BALBF	2X	AB	Test (R11)	M2 Y52Y	M2 Y52Y	0.861058	86	T	C	Var	Syn	M	52	844	M2	156	Y	Y	M_T844C	11250	4160	0	3582
10640	BALB/C	F	BALBF	1X	D	Test (R11)	M2 Y52Y	M2 Y52Y	0.991189	86	T	C	Var	Syn	M	52	844	M2	156	Y	Y	M_T844C	11250	454	0	450
10646	BALB/C	F	BALBF	1X	A	Test (R11)	M2 Y52Y	M2 Y52Y	0.555556	86	T	C	Var	Syn	M	52	844	M2	156	Y	Y	M_T844C	11250	234	0	130
10649	BALB/C	F	BALBF	1XP	1XP	Test (R11)	M2 Y52Y	M2 Y52Y	0.815933	86	T	C	Var	Syn	M	52	844	M2	156	Y	Y	M_T844C	11250	5134	0	4189
10724	C57BL/6	F	BALBF	1XP	1XP	Test (R11)	M2 Y52Y	M2 Y52Y	0.783914	86	T	C	Var	Syn	M	52	844	M2	156	Y	Y	M_T844C	11250	14323	0	11228
10732	C57BL/6	F	BALBF	1XP	1XP	Test (R11)	M2 Y52Y	M2 Y52Y	0.785837	86	T	C	Var	Syn	M	52	844	M2	156	Y	Y	M_T844C	11250	16310	0	12817
9740	C57BL/6	F	BL6F	1X	A	7	M2 F54F	M2 F54F	0.0171858	1	C	T	Var	Syn	M	54	850	M2	162	F	F	M_C850T	5377	931	1	16
10307	C57BL/6	M	BL6M	1X	D	10	M2 R61R	M2 R61R	0.0117221	2	A	G	Var	Syn	M	61	871	M2	183	R	R	M_A871G	4841	4692	5	55
9759	BALB/C	F	BALBF	2X	AB	7	M2 P63P	M2 P63P	0.0174129	1	T	C	Var	Syn	M	63	877	M2	189	P	P	M_T877C	4417	402	2	7
10626	BALB/C	F	BALBF	1XP	1XP	Test (R11)	M2 E66E	M2 E66E	0.02	1	A	G	Var	Syn	M	66	886	M2	198	E	E	M_A886G	4514	850	2	17
9045	C57BL/6	F	BL6F	4X	ABCD	4	M2 G67G	M2 G67G	0.00964443	1	A	G	Var	Syn	M	67	889	M2	201	G	G	M_A889G	8620	8606	6	83
8541	BALB/C	M	BALBM	Stock	C	1	M2 E70E	M2 E70E	0.012987	1	G	A	Var	Syn	M	70	898	M2	210	E	E	M_G898A	4095	616	0	8
9536	BALB/C	M	BALBM	1X	D	10	M2 E74E	M2 E74E	0.0109119	1	A	G	Var	Syn	M	74	910	M2	222	E	E	M_A910G	3444	1283	2	14
9603	BALB/C	F	BALBF	2X	CD	7	NP G17G	NP G17G	0.0819672	1	G	A	Var	Syn	NP	17	59	NP	51	G	G	NP_G59A	2018	122	1	10
9516	BALB/C	M	BALBM	2X	AB	10	NP E24K	NP E24K	0.0202605	2	G	A	Var	Nonsyn	NP	24	78	NP	70	E	K	NP_G78A	2365	691	0	14
9516	BALB/C	M	BALBM	2X	AB	10	NP E24E	NP E24E	0.0289687	1	G	A	Var	Syn	NP	24	80	NP	72	E	E	NP_G80A	4860	1726	0	50
9459	C57BL/6	F	BL6F	1X	D	4	NP R26R	NP R26R	0.088685	1	A	G	Var	Syn	NP	26	86	NP	78	R	R	NP_A86G	2449	327	0	29
9517	BALB/C	M	BALBM	4X	ABCD	10	NP K31R	NP K31R	0.0941176	1	A	G	Var	Nonsyn	NP	31	100	NP	92	K	R	NP_A100G	4901	3995	1	376
97690	BALB/C	F	BALBF	2X	AB	10	NP D34N	NP D34N	0.090798	5	G	A	Var	Nonsyn	NP	34	108	NP	100	D	N	NP_G108A	5169	5727	0	520
9515	BALB/C	M	BALBM	1X	A	10	NP D34N	NP D34N	0.0471014	5	G	A	Var	Nonsyn	NP	34	108	NP	100	D	N	NP_G108A	2617	276	0	13
9515	BALB/C	M	BALBM	1X	A	10	NP C44C	NP C44C	0.0396226	2	C	T	Var	Syn	NP	44	140	NP	132	C	C	NP_C140T	5853	530	0	21
10648	BALB/C	F	BALBF	4X	ABCD	Test (R11)	NP L47L	NP L47L	0.181818	1	T	A	Var	Syn	NP	47	149	NP	141	L	L	NP_T149A	3193	44	0	8
97730	BALB/C	F	BALBF	1X	B	10	NP S50N	NP S50N	0.0111834	3	G	A	Var	Nonsyn	NP	50	157	NP	149	S	N	NP_G157A	6451	7690	1	86
97760	BALB/C	F	BALBF	1X	D	10	NP S50N	NP S50N	0.0139632	3	G	A	Var	Nonsyn	NP	50	157	NP	149	S	N	NP_G157A	6451	6732	1	94
97690	BALB/C	F	BALBF	2X	AB	10	NP L56L	NP L56L	0.0445869	3	C	T	Var	Syn	NP	56	174	NP	166	L	L	NP_C174T	6745	7334	1	327
10637	BALB/C	F	BALBF	2X	AB	Test (R11)	NP L56L	NP L56L	0.176923	3	C	T	Var	Syn	NP	56	174	NP	166	L	L	NP_C174T	6745	130	1	23
9518	BALB/C	M	BALBM	1X	B	10	NP M66T	NP M66T	0.0243902	1	T	C	Var	Nonsyn	NP	66	205	NP	197	M	T	NP_T205C	3877	492	0	12
9518	BALB/C	M	BALBM	1X	B	10	NP V67V	NP V67V	0.0405405	1	G	T	Var	Syn	NP	67	209	NP	201	V	V	NP_G209T	3707	666	0	27
9515	BALB/C	M	BALBM	1X	A	10	NP E73K	NP E73K	0.0359712	1	G	A	Var	Nonsyn	NP	73	225	NP	217	E	K	NP_G225A	3760	278	5	10
9603	BALB/C	F	BALBF	2X	CD	7	NP R74R	NP R74R	0.0368098	1	A	G	Var	Syn	NP	74	230	NP	222	R	R	NP_A230G	3675	163	3	6
9537	BALB/C	M	BALBM	2X	CD	10	NP E80K	NP E80K	0.233333	1	G	A	Var	Nonsyn	NP	80	246	NP	238	E	K	NP_G246A	3660	30	2	7
97680	BALB/C	F	BALBF	1X	A	10	NP E81K	NP E81K	0.0101022	2	G	A	Var	Nonsyn	NP	81	249	NP	241	E	K	NP_G249A	7439	8315	1	84
9516	BALB/C	M	BALBM	2X	AB	10	NP E81E	NP E81E	0.0176263	2	A	G	Var	Syn	NP	81	251	NP	243	E	E	NP_A251G	3659	851	2	15
9739	C57BL/6	F	BL6F	2X	AB	7	NP E81E	NP E81E	0.0128783	2	A	G	Var	Syn	NP	81	251	NP	243	E	E	NP_A251G	3659	1553	2	20
9943	C57BL/6	F	BL6F	2X	CD	7	NP S84S	NP S84S	0.0115607	4	C	T	Var	Syn	NP	84	260	NP	252	S	S	NP_C260T	3624	1211	1	14
9603	BALB/C	F	BALBF	2X	CD	7	NP D88D	NP D88D	0.0622407	1	T	C	Var	Syn	NP	88	272	NP	264	D	D	NP_T272C	7307	241	0	15
9740	C57BL/6	F	BL6F	1X	A	7	NP P89P	NP P89P	0.0406977	1	T	C	Var	Syn	NP	89	275	NP	267	P	P	NP_T275C	3655	172	1	7
9759	BALB/C	F	BALBF	2X	AB	7	NP T92T	NP T92T	0.129032	1	T	C	Var	Syn	NP	92	284	NP	276	T	T	NP_T284C	3805	31	0	4
9516	BALB/C	M	BALBM	2X	AB	10	NP I96V	NP I96V	0.00973324	1	A	G	Var	Nonsyn	NP	96	294	NP	286	I	V	NP_A294G	8242	2774	2	27
10623	BALB/C	F	BALBF	1X	C	Test (R11)	NP I96I	NP I96I	0.0118243	2	A	T	Var	Syn	NP	96	296	NP	288	I	I	NP_A296T	4209	592	0	7
10305	C57BL/6	M	BL6M	2X	CD	10	NP K98R	NP K98R	0.0111111	1	A	G	Var	Nonsyn	NP	98	301	NP	293	K	R	NP_A301G	4114	1440	3	16
9293	C57BL/6	F	BL6F	1X	A	4	NP K98K	NP K98K	0.0114007	2	G	A	Var	Syn	NP	98	302	NP	294	K	K	NP_G302A	4103	1842	0	21
10637	BALB/C	F	BALBF	2X	AB	Test (R11)	NP R99R	NP R99R	0.0657895	1	A	G	Var	Syn	NP	99	305	NP	297	R	R	NP_A305G	3794	76	2	5
9516	BALB/C	M	BALBM	2X	AB	10	NP V100I	NP V100I	0.0124926	2	G	A	Var	Nonsyn	NP	100	306	NP	298	V	I	NP_G306A	3975	1681	2	21
9518	BALB/C	M	BALBM	1X	B	10	NP D101G	NP D101G	0.0452303	4	A	G	Var	Nonsyn	NP	101	310	NP	302	D	G	NP_A310G	7895	1216	1	55
9518	BALB/C	M	BALBM	1X	B	10	NP K103K	NP K103K	0.0330935	1	G	A	Var	Syn	NP	103	317	NP	309	K	K	NP_G317A	4007	695	0	23
10302	C57BL/6	M	BL6M	1X	B	10	NP M105I	NP M105I	0.0117356	1	G	T	Var	Nonsyn	NP	105	323	NP	315	M	I	NP_G323T	4019	1619	0	19
97690	BALB/C	F	BALBF	2X	AB	10	NP V109I	NP V109I	0.0689491	2	G	A	Var	Nonsyn	NP	109	333	NP	325	V	I	NP_G333A	7899	8383	0	578
9518	BALB/C	M	BALBM	1X	B	10	NP E114K	NP E114K	0.0388109	1	G	A	Var	Nonsyn	NP	114	348	NP	340	E	K	NP_G348A	8102	1211	0	47
9945	C57BL/6	F	BL6F	1X	D	7	NP R118R	NP R118R	0.0219245	2	C	A	Var	Syn	NP	118	360	NP	352	R	R	NP_C360A	4070	821	0	18
10309	C57BL/6	F	BL6F	1X	A	10	NP Q122*	NP Q122*	0.0113938	1	C	T	Var	Stop	NP	122	372	NP	364	Q	*	NP_C372T	3637	2633	0	30
97680	BALB/C	F	BALBF	1X	A	10	NP N125T	NP N125T	0.0187514	5	A	C	Var	Nonsyn	NP	125	382	NP	374	N	T	NP_A382C	8170	9226	0	173
9518	BALB/C	M	BALBM	1X	B	10	NP N125S	NP N125S	0.0153257	1	A	G	Var	Nonsyn	NP	125	382	NP	374	N	S	NP_A382G	4138	522	0	8
10314	C57BL/6	F	BL6F	1X	C	10	NP D127N	NP D127N	0.0350725	3	G	A	Var	Nonsyn	NP	127	387	NP	379	D	N	NP_G387A	7805	4619	0	162
9518	BALB/C	M	BALBM	1X	B	10	NP T130A	NP T130A	0.0373692	1	A	G	Var	Nonsyn	NP	130	396	NP	388	T	A	NP_A396G	3907	669	0	25
10648	BALB/C	F	BALBF	4X	ABCD	Test (R11)	NP A131A	NP A131A	0.0793651	1	T	A	Var	Syn	NP	131	401	NP	393	A	A	NP_T401A	3730	63	0	5
10648	BALB/C	F	BALBF	4X	ABCD	Test (R11)	NP T134T	NP T134T	0.111111	1	T	C	Var	Syn	NP	134	410	NP	402	T	T	NP_T410C	3923	36	3	4
9518	BALB/C	M	BALBM	1X	B	10	NP L143L	NP L143L	0.022293	1	G	A	Var	Syn	NP	143	437	NP	429	L	L	NP_G437A	3714	628	0	14
9943	C57BL/6	F	BL6F	2X	CD	7	NP N144N	NP N144N	0.0103627	1	T	C	Var	Syn	NP	144	440	NP	432	N	N	NP_T440C	3659	1158	0	12
9536	BALB/C	M	BALBM	1X	D	10	NP D145G	NP D145G	0.0733333	1	A	G	Var	Nonsyn	NP	145	442	NP	434	D	G	NP_A442G	3678	150	0	11
97690	BALB/C	F	BALBF	2X	AB	10	NP T146A	NP T146A	0.15719	14	A	G	Var	Nonsyn	NP	146	444	NP	436	T	A	NP_A444G	7436	7844	5	1233
97850	BALB/C	F	BALBF	4X	ABCD	10	NP T146A	NP T146A	0.985721	14	A	G	Var	Nonsyn	NP	146	444	NP	436	T	A	NP_A444G	7436	8124	5	8008
10220	C57BL/6	F	BL6F	2X	CD	10	NP T146A	NP T146A	0.0146006	14	A	G	Var	Nonsyn	NP	146	444	NP	436	T	A	NP_A444G	7436	6986	5	102
10314	C57BL/6	F	BL6F	1X	C	10	NP R150R	NP R150R	0.0106457	1	G	A	Var	Syn	NP	150	458	NP	450	R	R	NP_G458A	7134	4321	2	46
10624	BALB/C	F	BALBF	2X	CD	Test (R11)	NP R156R	NP R156R	0.0180361	1	C	T	Var	Syn	NP	156	476	NP	468	R	R	NP_C476T	3335	499	0	9
9045	C57BL/6	F	BL6F	4X	ABCD	4	NP D160D	NP D160D	0.0102677	1	T	C	Var	Syn	NP	160	488	NP	480	D	D	NP_T488C	3418	2727	0	28
8245	C57BL/6	M	BL6M	Stock	D	1	NP P161P	NP P161P	0.0155317	1	C	T	Var	Syn	NP	161	491	NP	483	P	P	NP_C491T	3528	837	0	13
9945	C57BL/6	F	BL6F	1X	D	7	NP R162R	NP R162R	0.0226586	3	G	A	Var	Syn	NP	162	494	NP	486	R	R	NP_G494A	3587	662	0	15
10649	BALB/C	F	BALBF	1XP	1XP	Test (R11)	NP R162R	NP R162R	0.034749	3	G	A	Var	Syn	NP	162	494	NP	486	R	R	NP_G494A	3845	259	0	9
9943	C57BL/6	F	BL6F	2X	CD	7	NP Q168Q	NP Q168Q	0.0207352	2	G	A	Var	Syn	NP	168	512	NP	504	Q	Q	NP_G512A	3797	1061	1	22
10623	BALB/C	F	BALBF	1X	C	Test (R11)	NP Q168Q	NP Q168Q	0.0183908	2	G	A	Var	Syn	NP	168	512	NP	504	Q	Q	NP_G512A	3797	435	1	8
8547	BALB/C	M	BALBM	Stock	B	1	NP T171T	NP T171T	0.0388889	2	T	C	Var	Syn	NP	171	521	NP	513	T	T	NP_T521C	3644	360	3	14
9740	C57BL/6	F	BL6F	1X	A	7	NP R175R	NP R175R	0.0502513	1	G	A	Var	Syn	NP	175	533	NP	525	R	R	NP_G533A	3474	199	0	10
8539	BALB/C	M	BALBM	Stock	D	1	NP S176S	NP S176S	0.0307942	2	T	C	Var	Syn	NP	176	536	NP	528	S	S	NP_T536C	3392	617	1	19
9943	C57BL/6	F	BL6F	2X	CD	7	NP G180G	NP G180G	0.0142045	1	C	T	Var	Syn	NP	180	548	NP	540	G	G	NP_C548T	3094	1056	0	15
9517	BALB/C	M	BALBM	4X	ABCD	10	NP V186I	NP V186I	0.0162692	4	G	A	Var	Nonsyn	NP	186	564	NP	556	V	I	NP_G564A	7462	6331	0	103
10311	C57BL/6	F	BL6F	4X	ABCD	10	NP V186I	NP V186I	0.0214286	4	G	A	Var	Nonsyn	NP	186	564	NP	556	V	I	NP_G564A	7462	3780	0	81
9767	BALB/C	F	BALBF	1X	C	7	NP L193L	NP L193L	0.0309278	2	G	A	Var	Syn	NP	193	587	NP	579	L	L	NP_G587A	3968	194	1	6
97680	BALB/C	F	BALBF	1X	A	10	NP R195R	NP R195R	0.0249382	5	G	A	Var	Syn	NP	195	593	NP	585	R	R	NP_G593A	7775	8902	1	222
10626	BALB/C	F	BALBF	1XP	1XP	Test (R11)	NP R195R	NP R195R	0.3	5	G	A	Var	Syn	NP	195	593	NP	585	R	R	NP_G593A	3959	20	1	6
10649	BALB/C	F	BALBF	1XP	1XP	Test (R11)	NP R195R	NP R195R	0.0321101	5	G	A	Var	Syn	NP	195	593	NP	585	R	R	NP_G593A	3816	218	0	7
10732	C57BL/6	F	BALBF	1XP	1XP	Test (R11)	NP R195R	NP R195R	0.0104603	5	G	A	Var	Syn	NP	195	593	NP	585	R	R	NP_G593A	3816	1434	0	15
9518	BALB/C	M	BALBM	1X	B	10	NP M196V	NP M196V	0.0246085	2	A	G	Var	Nonsyn	NP	196	594	NP	586	M	V	NP_A594G	3945	447	0	11
97680	BALB/C	F	BALBF	1X	A	10	NP R199R	NP R199R	0.0182752	3	T	C	Var	Syn	NP	199	605	NP	597	R	R	NP_T605C	7264	8372	1	153
10649	BALB/C	F	BALBF	1XP	1XP	Test (R11)	NP R199R	NP R199R	0.037234	3	T	C	Var	Syn	NP	199	605	NP	597	R	R	NP_T605C	3454	188	0	7
9459	C57BL/6	F	BL6F	1X	D	4	NP R204R	NP R204R	0.0676328	1	C	A	Var	Syn	NP	204	618	NP	610	R	R	NP_C618A	3632	414	0	28
9515	BALB/C	M	BALBM	1X	A	10	NP R204R	NP R204R	0.0196629	2	G	A	Var	Syn	NP	204	620	NP	612	R	R	NP_G620A	3695	356	0	7
9516	BALB/C	M	BALBM	2X	AB	10	NP E210E	NP E210E	0.015891	1	A	G	Var	Syn	NP	210	638	NP	630	E	E	NP_A638G	3642	881	0	14
97680	BALB/C	F	BALBF	1X	A	10	NP N211S	NP N211S	0.0205674	1	A	G	Var	Nonsyn	NP	211	640	NP	632	N	S	NP_A640G	7447	8460	0	174
9518	BALB/C	M	BALBM	1X	B	10	NP G212G	NP G212G	0.0238095	1	A	G	Var	Syn	NP	212	644	NP	636	G	G	NP_A644G	3563	672	2	16
9518	BALB/C	M	BALBM	1X	B	10	NP K214R	NP K214R	0.0353357	2	A	G	Var	Nonsyn	NP	214	649	NP	641	K	R	NP_A649G	7493	1132	0	40
9518	BALB/C	M	BALBM	1X	B	10	NP R216R	NP R216R	0.0264317	2	G	A	Var	Syn	NP	216	656	NP	648	R	R	NP_G656A	3579	681	0	18
10300	C57BL/6	M	BL6M	2X	AB	10	NP Y219Y	NP Y219Y	0.00797085	1	C	T	Var	Syn	NP	219	665	NP	657	Y	Y	NP_C665T	7248	4391	0	35
9516	BALB/C	M	BALBM	2X	AB	10	NP R221R	NP R221R	0.0338144	4	A	G	Var	Syn	NP	221	671	NP	663	R	R	NP_A671G	7270	2425	2	82
97690	BALB/C	F	BALBF	2X	AB	10	NP R221R	NP R221R	0.0317503	4	A	G	Var	Syn	NP	221	671	NP	663	R	R	NP_A671G	7270	7496	2	238
10637	BALB/C	F	BALBF	2X	AB	Test (R11)	NP R221R	NP R221R	0.192982	4	A	G	Var	Syn	NP	221	671	NP	663	R	R	NP_A671G	7270	171	2	33
9518	BALB/C	M	BALBM	1X	B	10	NP C223R	NP C223R	0.0217918	1	T	C	Var	Nonsyn	NP	223	675	NP	667	C	R	NP_T675C	3548	413	3	9
8541	BALB/C	M	BALBM	Stock	C	1	NP N224N	NP N224N	0.048	1	C	T	Var	Syn	NP	224	680	NP	672	N	N	NP_C680T	3654	125	0	6
10317	C57BL/6	F	BL6F	1X	D	10	NP L226L	NP L226L	0.0233918	1	C	A	Var	Syn	NP	226	686	NP	678	L	L	NP_C686A	3226	1368	8	32
8541	BALB/C	M	BALBM	Stock	C	1	NP G228G	NP G228G	0.0769231	3	A	G	Var	Syn	NP	228	692	NP	684	G	G	NP_A692G	3801	130	0	10
10220	C57BL/6	F	BL6F	2X	CD	10	NP G228G	NP G228G	0.016199	3	A	G	Var	Syn	NP	228	692	NP	684	G	G	NP_A692G	7435	6914	0	112
9943	C57BL/6	F	BL6F	2X	CD	7	NP G228G	NP G228G	0.0106007	3	A	G	Var	Syn	NP	228	692	NP	684	G	G	NP_A692G	3801	1132	0	12
9518	BALB/C	M	BALBM	1X	B	10	NP V242V	NP V242V	0.0313653	1	G	A	Var	Syn	NP	242	734	NP	726	V	V	NP_G734A	2884	542	3	17
9536	BALB/C	M	BALBM	1X	D	10	NP P248S	NP P248S	0.166667	1	C	T	Var	Nonsyn	NP	248	750	NP	742	P	S	NP_C750T	3093	36	0	6
10307	C57BL/6	M	BL6M	1X	D	10	NP E252E	NP E252E	0.010989	1	G	A	Var	Syn	NP	252	764	NP	756	E	E	NP_G764A	2853	1820	0	20
10304	C57BL/6	M	BL6M	1X	C	10	NP D255D	NP D255D	0.389091	1	T	C	Var	Syn	NP	255	773	NP	765	D	D	NP_T773C	5053	4125	1	1605
9537	BALB/C	M	BALBM	2X	CD	10	NP F258L	NP F258L	0.363636	1	T	C	Var	Nonsyn	NP	258	780	NP	772	F	L	NP_T780C	2958	11	0	4
10305	C57BL/6	M	BL6M	2X	CD	10	NP F258F	NP F258F	0.0204819	1	T	C	Var	Syn	NP	258	782	NP	774	F	F	NP_T782C	2311	830	0	17
10299	C57BL/6	M	BL6M	1X	A	10	NP R261L	NP R261L	0.0115607	1	G	T	Var	Nonsyn	NP	261	790	NP	782	R	L	NP_G790T	2800	1038	0	12
9315	BALB/C	F	BALBF	1X	A	4	NP A263A	NP A263A	0.14	1	A	G	Var	Syn	NP	263	797	NP	789	A	A	NP_A797G	2577	50	1	7
9518	BALB/C	M	BALBM	1X	B	10	NP I265V	NP I265V	0.0830325	1	A	G	Var	Nonsyn	NP	265	801	NP	793	I	V	NP_A801G	2534	277	0	23
9287	C57BL/6	F	BL6F	2X	CD	4	NP G268G	NP G268G	0.0119572	8	G	A	Var	Syn	NP	268	812	NP	804	G	G	NP_G812A	2089	1589	0	19
97830	BALB/C	F	BALBF	1X	C	10	NP G268G	NP G268G	0.17798	8	G	A	Var	Syn	NP	268	812	NP	804	G	G	NP_G812A	4361	4832	0	860
10623	BALB/C	F	BALBF	1X	C	Test (R11)	NP G268G	NP G268G	0.126844	8	G	A	Var	Syn	NP	268	812	NP	804	G	G	NP_G812A	4361	678	0	86
10724	C57BL/6	F	BALBF	1XP	1XP	Test (R11)	NP G268G	NP G268G	0.0212858	8	G	A	Var	Syn	NP	268	812	NP	804	G	G	NP_G812A	4361	2302	0	49
10732	C57BL/6	F	BALBF	1XP	1XP	Test (R11)	NP G268G	NP G268G	0.01625	8	G	A	Var	Syn	NP	268	812	NP	804	G	G	NP_G812A	2089	800	0	13
9045	C57BL/6	F	BL6F	4X	ABCD	4	NP L276L	NP L276L	0.0488677	3	G	T	Var	Syn	NP	276	836	NP	828	L	L	NP_G836T	3894	3356	0	164
10311	C57BL/6	F	BL6F	4X	ABCD	10	NP L276L	NP L276L	0.0405728	3	G	T	Var	Syn	NP	276	836	NP	828	L	L	NP_G836T	3894	2095	0	85
9518	BALB/C	M	BALBM	1X	B	10	NP A284T	NP A284T	0.029484	1	G	A	Var	Nonsyn	NP	284	858	NP	850	A	T	NP_G858A	3687	407	0	12
9518	BALB/C	M	BALBM	1X	B	10	NP A284A	NP A284A	0.0378657	2	C	T	Var	Syn	NP	284	860	NP	852	A	A	NP_C860T	3535	581	0	22
97730	BALB/C	F	BALBF	1X	B	10	NP D290N	NP D290N	0.0116677	8	G	A	Var	Nonsyn	NP	290	876	NP	868	D	N	NP_G876A	7108	7885	0	92
9517	BALB/C	M	BALBM	4X	ABCD	10	NP D290N	NP D290N	0.0602553	8	G	A	Var	Nonsyn	NP	290	876	NP	868	D	N	NP_G876A	7108	5875	0	354
9536	BALB/C	M	BALBM	1X	D	10	NP D290N	NP D290N	0.644898	8	G	A	Var	Nonsyn	NP	290	876	NP	868	D	N	NP_G876A	7108	245	0	158
10314	C57BL/6	F	BL6F	1X	C	10	NP D290N	NP D290N	0.332317	8	G	A	Var	Nonsyn	NP	290	876	NP	868	D	N	NP_G876A	7108	4264	0	1417
97860	BALB/C	F	BALBF	2X	CD	10	NP D290E	NP D290E	0.353406	9	C	A	Var	Nonsyn	NP	290	878	NP	870	D	E	NP_C878A	7035	7091	2	2506
8245	C57BL/6	M	BL6M	Stock	D	1	NP K293K	NP K293K	0.0127877	4	A	G	Var	Syn	NP	293	887	NP	879	K	K	NP_A887G	3421	782	0	10
10649	BALB/C	F	BALBF	1XP	1XP	Test (R11)	NP K293K	NP K293K	0.0418006	4	A	G	Var	Syn	NP	293	887	NP	879	K	K	NP_A887G	3574	311	0	13
9737	C57BL/6	F	BL6F	1X	B	7	NP G295G	NP G295G	0.00998253	3	A	G	Var	Syn	NP	295	893	NP	885	G	G	NP_A893G	6942	4007	1	40
9515	BALB/C	M	BALBM	1X	A	10	NP G295G	NP G295G	0.0441558	3	A	G	Var	Syn	NP	295	893	NP	885	G	G	NP_A893G	3334	385	1	17
9518	BALB/C	M	BALBM	1X	B	10	NP Y296D	NP Y296D	0.0179487	1	T	G	Var	Nonsyn	NP	296	894	NP	886	Y	D	NP_T894G	3673	390	0	7
9293	C57BL/6	F	BL6F	1X	A	4	NP L298L	NP L298L	0.0137255	1	A	G	Var	Syn	NP	298	902	NP	894	L	L	NP_A902G	3798	1530	1	21
97730	BALB/C	F	BALBF	1X	B	10	NP V299V	NP V299V	0.0520039	5	G	A	Var	Syn	NP	299	905	NP	897	V	V	NP_G905A	7350	8134	0	423
10724	C57BL/6	F	BALBF	1XP	1XP	Test (R11)	NP V299V	NP V299V	0.0165441	5	G	A	Var	Syn	NP	299	905	NP	897	V	V	NP_G905A	7350	3808	0	63
10732	C57BL/6	F	BALBF	1XP	1XP	Test (R11)	NP V299V	NP V299V	0.017453	5	G	A	Var	Syn	NP	299	905	NP	897	V	V	NP_G905A	7350	3667	0	64
10305	C57BL/6	M	BL6M	2X	CD	10	NP I301L	NP I301L	0.361702	1	A	C	Var	Nonsyn	NP	301	909	NP	901	I	L	NP_A909C	7521	4183	0	1513
10309	C57BL/6	F	BL6F	1X	A	10	NP I301R	NP I301R	0.0980237	4	T	G	Var	Nonsyn	NP	301	910	NP	902	I	R	NP_T910G	7493	6325	0	620
9940	C57BL/6	F	BL6F	1X	C	7	NP D302D	NP D302D	0.0112045	1	C	T	Var	Syn	NP	302	914	NP	906	D	D	NP_C914T	3596	714	0	8
9315	BALB/C	F	BALBF	1X	A	4	NP F304F	NP F304F	0.158537	1	C	T	Var	Syn	NP	304	920	NP	912	F	F	NP_C920T	3876	82	0	13
10624	BALB/C	F	BALBF	2X	CD	Test (R11)	NP L307L	NP L307L	0.015625	1	T	C	Var	Syn	NP	307	929	NP	921	L	L	NP_T929C	3559	576	1	9
9518	BALB/C	M	BALBM	1X	B	10	NP Q308*	NP Q308*	0.015625	1	C	T	Var	Stop	NP	308	930	NP	922	Q	*	NP_C930T	3646	576	0	9
97850	BALB/C	F	BALBF	4X	ABCD	10	NP S310S	NP S310S	0.0108738	3	C	T	Var	Syn	NP	310	938	NP	930	S	S	NP_C938T	7462	7725	5	84
10302	C57BL/6	M	BL6M	1X	B	10	NP Q311R	NP Q311R	0.0112994	1	A	G	Var	Nonsyn	NP	311	940	NP	932	Q	R	NP_A940G	3886	1416	0	16
97860	BALB/C	F	BALBF	2X	CD	10	NP Q311H	NP Q311H	0.558898	9	A	C	Var	Nonsyn	NP	311	941	NP	933	Q	H	NP_A941C	7583	7878	0	4403
9517	BALB/C	M	BALBM	4X	ABCD	10	NP Q311H	NP Q311H	0.109613	1	A	T	Var	Nonsyn	NP	311	941	NP	933	Q	H	NP_A941T	7583	6304	0	691
10311	C57BL/6	F	BL6F	4X	ABCD	10	NP Q311H	NP Q311H	0.283091	9	A	C	Var	Nonsyn	NP	311	941	NP	933	Q	H	NP_A941C	7583	4193	0	1187
9945	C57BL/6	F	BL6F	1X	D	7	NP P318P	NP P318P	0.0131965	1	G	T	Var	Syn	NP	318	962	NP	954	P	P	NP_G962T	3956	682	0	9
8541	BALB/C	M	BALBM	Stock	C	1	NP N319N	NP N319N	0.0189873	1	C	T	Var	Syn	NP	319	965	NP	957	N	N	NP_C965T	3610	316	0	6
9518	BALB/C	M	BALBM	1X	B	10	NP N321N	NP N321N	0.0420712	1	T	C	Var	Syn	NP	321	971	NP	963	N	N	NP_T971C	3663	618	1	26
97730	BALB/C	F	BALBF	1X	B	10	NP K325K	NP K325K	0.0553187	5	G	A	Var	Syn	NP	325	983	NP	975	K	K	NP_G983A	7680	8677	0	480
10649	BALB/C	F	BALBF	1XP	1XP	Test (R11)	NP K325K	NP K325K	0.037037	5	G	A	Var	Syn	NP	325	983	NP	975	K	K	NP_G983A	3991	324	0	12
10724	C57BL/6	F	BALBF	1XP	1XP	Test (R11)	NP K325K	NP K325K	0.0120513	5	G	A	Var	Syn	NP	325	983	NP	975	K	K	NP_G983A	7680	3900	0	47
10732	C57BL/6	F	BALBF	1XP	1XP	Test (R11)	NP K325K	NP K325K	0.0110585	5	G	A	Var	Syn	NP	325	983	NP	975	K	K	NP_G983A	7680	3798	0	42
9767	BALB/C	F	BALBF	1X	C	7	NP S326S	NP S326S	0.029036	7	T	C	Var	Syn	NP	326	986	NP	978	S	S	NP_T986C	7554	861	0	25
97830	BALB/C	F	BALBF	1X	C	10	NP S326S	NP S326S	0.17527	7	T	C	Var	Syn	NP	326	986	NP	978	S	S	NP_T986C	7554	7788	0	1365
10623	BALB/C	F	BALBF	1X	C	Test (R11)	NP S326S	NP S326S	0.120069	7	T	C	Var	Syn	NP	326	986	NP	978	S	S	NP_T986C	7554	1166	0	140
10649	BALB/C	F	BALBF	1XP	1XP	Test (R11)	NP S326S	NP S326S	0.0357143	7	T	C	Var	Syn	NP	326	986	NP	978	S	S	NP_T986C	3543	224	0	8
10724	C57BL/6	F	BALBF	1XP	1XP	Test (R11)	NP S326S	NP S326S	0.0224367	7	T	C	Var	Syn	NP	326	986	NP	978	S	S	NP_T986C	7554	3833	0	86
10732	C57BL/6	F	BALBF	1XP	1XP	Test (R11)	NP S326S	NP S326S	0.012587	7	T	C	Var	Syn	NP	326	986	NP	978	S	S	NP_T986C	7554	3734	0	47
10307	C57BL/6	M	BL6M	1X	D	10	NP Q327Q	NP Q327Q	0.0581926	3	G	A	Var	Syn	NP	327	989	NP	981	Q	Q	NP_G989A	7911	4382	1	255
10649	BALB/C	F	BALBF	1XP	1XP	Test (R11)	NP L328L	NP L328L	0.0353982	1	C	T	Var	Syn	NP	328	990	NP	982	L	L	NP_C990T	4142	339	2	12
9515	BALB/C	M	BALBM	1X	A	10	NP A337A	NP A337A	0.0203488	1	A	G	Var	Syn	NP	337	1019	NP	1011	A	A	NP_A1019G	4150	344	0	7
9740	C57BL/6	F	BL6F	1X	A	7	NP L341L	NP L341L	0.0223214	1	A	G	Var	Syn	NP	341	1031	NP	1023	L	L	NP_A1031G	4259	448	2	10
9940	C57BL/6	F	BL6F	1X	C	7	NP R342R	NP R342R	0.0438247	3	A	G	Var	Syn	NP	342	1034	NP	1026	R	R	NP_A1034G	3796	753	0	33
9945	C57BL/6	F	BL6F	1X	D	7	NP R342R	NP R342R	0.0123457	3	A	G	Var	Syn	NP	342	1034	NP	1026	R	R	NP_A1034G	3796	648	0	8
10314	C57BL/6	F	BL6F	1X	C	10	NP R342R	NP R342R	0.028762	3	A	G	Var	Syn	NP	342	1034	NP	1026	R	R	NP_A1034G	8037	4798	4	138
10309	C57BL/6	F	BL6F	1X	A	10	NP V343I	NP V343I	0.905038	3	G	A	Var	Nonsyn	NP	343	1035	NP	1027	V	I	NP_G1035A	8311	6371	0	5766
9945	C57BL/6	F	BL6F	1X	D	7	NP L344L	NP L344L	0.0346908	1	T	C	Var	Syn	NP	344	1038	NP	1030	L	L	NP_T1038C	3869	663	3	23
10302	C57BL/6	M	BL6M	1X	B	10	NP S345G	NP S345G	0.0104781	1	A	G	Var	Nonsyn	NP	345	1041	NP	1033	S	G	NP_A1041G	4241	1527	0	16
10317	C57BL/6	F	BL6F	1X	D	10	NP G349G	NP G349G	0.0125707	2	G	A	Var	Syn	NP	349	1055	NP	1047	G	G	NP_G1055A	4013	1591	1	20
8547	BALB/C	M	BALBM	Stock	B	1	NP T350T	NP T350T	0.0197531	1	C	A	Var	Syn	NP	350	1058	NP	1050	T	T	NP_C1058A	4182	405	0	8
9943	C57BL/6	F	BL6F	2X	CD	7	NP S353S	NP S353S	0.014733	1	C	T	Var	Syn	NP	353	1067	NP	1059	S	S	NP_C1067T	4209	1086	0	16
9459	C57BL/6	F	BL6F	1X	D	4	NP R355R	NP R355R	0.0566893	7	G	A	Var	Syn	NP	355	1073	NP	1065	R	R	NP_G1073A	3856	441	0	25
97730	BALB/C	F	BALBF	1X	B	10	NP R355R	NP R355R	0.105377	7	G	A	Var	Syn	NP	355	1073	NP	1065	R	R	NP_G1073A	8128	8797	0	927
10626	BALB/C	F	BALBF	1XP	1XP	Test (R11)	NP R355R	NP R355R	0.0631579	7	G	A	Var	Syn	NP	355	1073	NP	1065	R	R	NP_G1073A	3856	95	0	6
10649	BALB/C	F	BALBF	1XP	1XP	Test (R11)	NP R355R	NP R355R	0.05	7	G	A	Var	Syn	NP	355	1073	NP	1065	R	R	NP_G1073A	8128	560	0	28
10724	C57BL/6	F	BALBF	1XP	1XP	Test (R11)	NP R355R	NP R355R	0.0357683	7	G	A	Var	Syn	NP	355	1073	NP	1065	R	R	NP_G1073A	8128	3970	0	142
10732	C57BL/6	F	BALBF	1XP	1XP	Test (R11)	NP R355R	NP R355R	0.0412371	7	G	A	Var	Syn	NP	355	1073	NP	1065	R	R	NP_G1073A	8128	3977	0	164
9739	C57BL/6	F	BL6F	2X	AB	7	NP L358L	NP L358L	0.0280572	1	T	C	Var	Syn	NP	358	1082	NP	1074	L	L	NP_T1082C	8335	3778	2	106
9287	C57BL/6	F	BL6F	2X	CD	4	NP S359S	NP S359S	0.0176056	3	C	A	Var	Syn	NP	359	1085	NP	1077	S	S	NP_C1085A	8537	6248	0	110
9943	C57BL/6	F	BL6F	2X	CD	7	NP S359S	NP S359S	0.0114841	3	C	A	Var	Syn	NP	359	1085	NP	1077	S	S	NP_C1085A	4432	1132	0	13
10220	C57BL/6	F	BL6F	2X	CD	10	NP S359S	NP S359S	0.0171596	3	C	A	Var	Syn	NP	359	1085	NP	1077	S	S	NP_C1085A	8537	7168	0	123
10624	BALB/C	F	BALBF	2X	CD	Test (R11)	NP R361R	NP R361R	0.0227743	1	A	G	Var	Syn	NP	361	1091	NP	1083	R	R	NP_A1091G	4402	483	1	11
9943	C57BL/6	F	BL6F	2X	CD	7	NP G362G	NP G362G	0.0114099	2	A	G	Var	Syn	NP	362	1094	NP	1086	G	G	NP_A1094G	3971	1227	0	14
10624	BALB/C	F	BALBF	2X	CD	Test (R11)	NP G362G	NP G362G	0.0183333	2	A	G	Var	Syn	NP	362	1094	NP	1086	G	G	NP_A1094G	3971	600	0	11
10305	C57BL/6	M	BL6M	2X	CD	10	NP S367S	NP S367S	0.010397	1	A	T	Var	Syn	NP	367	1109	NP	1101	S	S	NP_A1109T	8194	4232	1	44
10302	C57BL/6	M	BL6M	1X	B	10	NP N368D	NP N368D	0.0103806	1	A	G	Var	Nonsyn	NP	368	1110	NP	1102	N	D	NP_A1110G	4233	1445	0	15
97680	BALB/C	F	BALBF	1X	A	10	NP M371I	NP M371I	0.0519527	5	G	A	Var	Nonsyn	NP	371	1121	NP	1113	M	I	NP_G1121A	8224	8450	1	439
9515	BALB/C	M	BALBM	1X	A	10	NP M371I	NP M371I	1	5	G	A	Var	Nonsyn	NP	371	1121	NP	1113	M	I	NP_G1121A	8224	760	1	760
10623	BALB/C	F	BALBF	1X	C	Test (R11)	NP D372D	NP D372D	0.0374787	1	T	C	Var	Syn	NP	372	1124	NP	1116	D	D	NP_T1124C	4272	587	0	22
9943	C57BL/6	F	BL6F	2X	CD	7	NP A373A	NP A373A	0.0122642	2	T	C	Var	Syn	NP	373	1127	NP	1119	A	A	NP_T1127C	4257	1060	0	13
0	STOCK	STOCK	STOCK	STOCK	STOCK	STOCK	NP M374I	NP M374I	0.0155014	7	G	A	Var	Nonsyn	NP	374	1130	NP	1122	M	I	NP_G1130A	8261	6193	3	96
97830	BALB/C	F	BALBF	1X	C	10	NP E375K	NP E375K	0.022583	3	G	A	Var	Nonsyn	NP	375	1131	NP	1123	E	K	NP_G1131A	8305	8192	0	185
9459	C57BL/6	F	BL6F	1X	D	4	NP E375E	NP E375E	0.0202492	2	A	G	Var	Syn	NP	375	1133	NP	1125	E	E	NP_A1133G	8293	642	0	13
97760	BALB/C	F	BALBF	1X	D	10	NP S377I	NP S377I	0.0112942	1	G	T	Var	Nonsyn	NP	377	1138	NP	1130	S	I	NP_G1138T	8347	7526	1	85
9315	BALB/C	F	BALBF	1X	A	4	NP T378T	NP T378T	0.0510204	1	T	C	Var	Syn	NP	378	1142	NP	1134	T	T	NP_T1142C	4293	98	4	5
9316	BALB/C	F	BALBF	2X	AB	4	NP E380E	NP E380E	0.0990099	2	A	G	Var	Syn	NP	380	1148	NP	1140	E	E	NP_A1148G	4001	101	0	10
9740	C57BL/6	F	BL6F	1X	A	7	NP S383S	NP S383S	0.014218	2	C	T	Var	Syn	NP	383	1157	NP	1149	S	S	NP_C1157T	4288	422	0	6
97730	BALB/C	F	BALBF	1X	B	10	NP S383S	NP S383S	0.010561	2	C	T	Var	Syn	NP	383	1157	NP	1149	S	S	NP_C1157T	8195	8806	1	93
9515	BALB/C	M	BALBM	1X	A	10	NP W386R	NP W386R	0.013834	2	T	C	Var	Nonsyn	NP	386	1164	NP	1156	W	R	NP_T1164C	4201	506	0	7
9536	BALB/C	M	BALBM	1X	D	10	NP W386R	NP W386R	0.0367647	2	T	C	Var	Nonsyn	NP	386	1164	NP	1156	W	R	NP_T1164C	4201	136	0	5
9518	BALB/C	M	BALBM	1X	B	10	NP A387T	NP A387T	0.0183616	1	G	A	Var	Nonsyn	NP	387	1167	NP	1159	A	T	NP_G1167A	3897	708	1	13
9315	BALB/C	F	BALBF	1X	A	4	NP R389R	NP R389R	0.0344828	1	A	G	Var	Syn	NP	389	1175	NP	1167	R	R	NP_A1175G	4125	145	0	5
9759	BALB/C	F	BALBF	2X	AB	7	NP T390T	NP T390T	0.0674847	1	C	T	Var	Syn	NP	390	1178	NP	1170	T	T	NP_C1178T	3815	163	1	11
9518	BALB/C	M	BALBM	1X	B	10	NP G393R	NP G393R	0.0294695	1	G	A	Var	Nonsyn	NP	393	1185	NP	1177	G	R	NP_G1185A	4100	509	0	15
9316	BALB/C	F	BALBF	2X	AB	4	NP G393G	NP G393G	0.0540541	2	A	G	Var	Syn	NP	393	1187	NP	1179	G	G	NP_A1187G	3742	111	1	6
9750	BALB/C	F	BALBF	4X	ABCD	7	NP G393G	NP G393G	0.0156076	2	A	G	Var	Syn	NP	393	1187	NP	1179	G	G	NP_A1187G	4091	897	5	14
10305	C57BL/6	M	BL6M	2X	CD	10	NP G394G	NP G394G	0.022113	1	A	G	Var	Syn	NP	394	1190	NP	1182	G	G	NP_A1190G	7839	4070	0	90
10624	BALB/C	F	BALBF	2X	CD	Test (R11)	NP T396T	NP T396T	0.0247619	2	T	C	Var	Syn	NP	396	1196	NP	1188	T	T	NP_T1196C	4020	525	1	13
8542	BALB/C	M	BALBM	Stock	A	1	NP Q399Q	NP Q399Q	0.0165746	1	G	A	Var	Syn	NP	399	1205	NP	1197	Q	Q	NP_G1205A	3780	362	0	6
10313	C57BL/6	F	BL6F	2X	AB	10	NP I406T	NP I406T	0.643429	4	T	C	Var	Nonsyn	NP	406	1225	NP	1217	I	T	NP_T1225C	7761	3873	0	2492
10300	C57BL/6	M	BL6M	2X	AB	10	NP Q409H	NP Q409H	0.997622	1	A	C	Var	Nonsyn	NP	409	1235	NP	1227	Q	H	NP_A1235C	7542	4206	0	4196
8539	BALB/C	M	BALBM	Stock	D	1	NP P410P	NP P410P	0.0163361	1	T	A	Var	Syn	NP	410	1238	NP	1230	P	P	NP_T1238A	3625	857	0	14
10302	C57BL/6	M	BL6M	1X	B	10	NP A411T	NP A411T	0.0924055	2	G	A	Var	Nonsyn	NP	411	1239	NP	1231	A	T	NP_G1239A	7637	2673	1	247
9516	BALB/C	M	BALBM	2X	AB	10	NP V414M	NP V414M	0.235878	4	G	A	Var	Nonsyn	NP	414	1248	NP	1240	V	M	NP_G1248A	7883	2921	0	689
9536	BALB/C	M	BALBM	1X	D	10	NP V414M	NP V414M	0.0995851	4	G	A	Var	Nonsyn	NP	414	1248	NP	1240	V	M	NP_G1248A	4083	241	0	24
10317	C57BL/6	F	BL6F	1X	D	10	NP V414V	NP V414V	0.0510051	1	G	A	Var	Syn	NP	414	1250	NP	1242	V	V	NP_G1250A	7968	3333	6	170
9516	BALB/C	M	BALBM	2X	AB	10	NP Q415H	NP Q415H	0.0181398	1	A	C	Var	Nonsyn	NP	415	1253	NP	1245	Q	H	NP_A1253C	8134	3032	0	55
9945	C57BL/6	F	BL6F	1X	D	7	NP L418L	NP L418L	0.0127877	1	C	T	Var	Syn	NP	418	1262	NP	1254	L	L	NP_C1262T	4109	782	0	10
97680	BALB/C	F	BALBF	1X	A	10	NP D421N	NP D421N	0.188917	7	G	A	Var	Nonsyn	NP	421	1269	NP	1261	D	N	NP_G1269A	8089	7940	0	1500
97680	BALB/C	F	BALBF	1X	A	10	NP A428T	NP A428T	0.433761	7	G	A	Var	Nonsyn	NP	428	1290	NP	1282	A	T	NP_G1290A	8049	7873	2	3415
9536	BALB/C	M	BALBM	1X	D	10	NP F429S	NP F429S	0.0343053	2	T	C	Var	Nonsyn	NP	429	1294	NP	1286	F	S	NP_T1294C	3815	583	0	20
9537	BALB/C	M	BALBM	2X	CD	10	NP G431R	NP G431R	0.106061	1	G	A	Var	Nonsyn	NP	431	1299	NP	1291	G	R	NP_G1299A	3755	132	1	14
9500	BALB/C	M	BALBM	1X	C	10	NP T437T	NP T437T	0.04	1	A	G	Var	Syn	NP	437	1319	NP	1311	T	T	NP_A1319G	3701	100	0	4
9940	C57BL/6	F	BL6F	1X	C	7	NP S438S	NP S438S	0.0179969	1	A	G	Var	Syn	NP	438	1322	NP	1314	S	S	NP_A1322G	7165	1278	3	23
8547	BALB/C	M	BALBM	Stock	B	1	NP R441R	NP R441R	0.0216763	3	G	A	Var	Syn	NP	441	1331	NP	1323	R	R	NP_G1331A	3473	692	0	15
9315	BALB/C	F	BALBF	1X	A	4	NP R441R	NP R441R	0.103448	3	G	A	Var	Syn	NP	441	1331	NP	1323	R	R	NP_G1331A	3473	261	0	27
9536	BALB/C	M	BALBM	1X	D	10	NP R441R	NP R441R	0.0174825	3	G	A	Var	Syn	NP	441	1331	NP	1323	R	R	NP_G1331A	3276	572	2	10
10311	C57BL/6	F	BL6F	4X	ABCD	10	NP A442T	NP A442T	0.0152655	4	G	A	Var	Nonsyn	NP	442	1332	NP	1324	A	T	NP_G1332A	6666	4520	1	69
9337	BALB/C	F	BALBF	2X	CD	4	NP R446R	NP R446R	0.0413793	4	G	A	Var	Syn	NP	446	1346	NP	1338	R	R	NP_G1346A	3234	290	1	12
9603	BALB/C	F	BALBF	2X	CD	7	NP R446R	NP R446R	0.0411184	4	G	A	Var	Syn	NP	446	1346	NP	1338	R	R	NP_G1346A	6592	608	1	25
9537	BALB/C	M	BALBM	2X	CD	10	NP M447V	NP M447V	0.060241	2	A	G	Var	Nonsyn	NP	447	1347	NP	1339	M	V	NP_A1347G	3323	83	0	5
9767	BALB/C	F	BALBF	1X	C	7	NP G450G	NP G450G	0.0170068	1	T	A	Var	Syn	NP	450	1358	NP	1350	G	G	NP_T1358A	2999	588	1	10
9536	BALB/C	M	BALBM	1X	D	10	NP P453L	NP P453L	0.0170455	1	C	T	Var	Nonsyn	NP	453	1366	NP	1358	P	L	NP_C1366T	2860	528	0	9
8244	C57BL/6	M	BL6M	Stock	B	1	NP S457S	NP S457S	0.0116641	1	C	T	Var	Syn	NP	457	1379	NP	1371	S	S	NP_C1379T	2684	1286	0	15
10624	BALB/C	F	BALBF	2X	CD	Test (R11)	NP Q459Q	NP Q459Q	0.025463	1	G	A	Var	Syn	NP	459	1385	NP	1377	Q	Q	NP_G1385A	2698	864	0	22
97680	BALB/C	F	BALBF	1X	A	10	NP G462G	NP G462G	0.0225857	1	A	G	Var	Syn	NP	462	1394	NP	1386	G	G	NP_A1394G	3894	3852	6	87
97830	BALB/C	F	BALBF	1X	C	10	NP V463I	NP V463I	0.279669	9	G	A	Var	Nonsyn	NP	463	1395	NP	1387	V	I	NP_G1395A	4281	4112	3	1150
9518	BALB/C	M	BALBM	1X	B	10	NP V463I	NP V463I	0.0833333	9	G	A	Var	Nonsyn	NP	463	1395	NP	1387	V	I	NP_G1395A	2050	456	2	38
9536	BALB/C	M	BALBM	1X	D	10	NP S467S	NP S467S	0.0338028	2	G	A	Var	Syn	NP	467	1409	NP	1401	S	S	NP_G1409A	1971	355	2	12
10299	C57BL/6	M	BL6M	1X	A	10	NP S467S	NP S467S	0.0442198	2	G	A	Var	Syn	NP	467	1409	NP	1401	S	S	NP_G1409A	4077	1583	4	70
97730	BALB/C	F	BALBF	1X	B	10	NP E469E	NP E469E	0.0244493	3	A	G	Var	Syn	NP	469	1415	NP	1407	E	E	NP_A1415G	4148	4131	2	101
10649	BALB/C	F	BALBF	1XP	1XP	Test (R11)	NP E469E	NP E469E	0.023753	3	A	G	Var	Syn	NP	469	1415	NP	1407	E	E	NP_A1415G	2179	421	1	10
97690	BALB/C	F	BALBF	2X	AB	10	NP K470R	NP K470R	0.0957695	18	A	G	Var	Nonsyn	NP	470	1417	NP	1409	K	R	NP_A1417G	4326	3853	3	369
97730	BALB/C	F	BALBF	1X	B	10	NP K470R	NP K470R	0.0342593	18	A	G	Var	Nonsyn	NP	470	1417	NP	1409	K	R	NP_A1417G	4326	4320	3	148
97830	BALB/C	F	BALBF	1X	C	10	NP K470R	NP K470R	0.216462	18	A	G	Var	Nonsyn	NP	470	1417	NP	1409	K	R	NP_A1417G	4326	3742	3	810
9517	BALB/C	M	BALBM	4X	ABCD	10	NP K470R	NP K470R	0.0184125	18	A	G	Var	Nonsyn	NP	470	1417	NP	1409	K	R	NP_A1417G	4326	4019	3	74
10314	C57BL/6	F	BL6F	1X	C	10	NP K470R	NP K470R	0.0173724	18	A	G	Var	Nonsyn	NP	470	1417	NP	1409	K	R	NP_A1417G	4326	2763	3	48
10317	C57BL/6	F	BL6F	1X	D	10	NP K470K	NP K470K	0.0147965	1	G	A	Var	Syn	NP	470	1418	NP	1410	K	K	NP_G1418A	1918	811	0	12
97730	BALB/C	F	BALBF	1X	B	10	NP A472T	NP A472T	0.0221056	11	G	A	Var	Nonsyn	NP	472	1422	NP	1414	A	T	NP_G1422A	3642	3619	2	80
97830	BALB/C	F	BALBF	1X	C	10	NP A472T	NP A472T	0.012987	11	G	A	Var	Nonsyn	NP	472	1422	NP	1414	A	T	NP_G1422A	1751	1463	0	19
9537	BALB/C	M	BALBM	2X	CD	10	NP A472T	NP A472T	0.0769231	11	G	A	Var	Nonsyn	NP	472	1422	NP	1414	A	T	NP_G1422A	1751	78	0	6
10304	C57BL/6	M	BL6M	1X	C	10	NP A472T	NP A472T	0.0171133	11	G	A	Var	Nonsyn	NP	472	1422	NP	1414	A	T	NP_G1422A	3642	3097	2	53
97730	BALB/C	F	BALBF	1X	B	10	NP V476A	NP V476A	0.149562	7	T	C	Var	Nonsyn	NP	476	1435	NP	1427	V	A	NP_T1435C	3259	3196	2	478
10649	BALB/C	F	BALBF	1XP	1XP	Test (R11)	NP P477P	NP P477P	0.0337662	1	C	T	Var	Syn	NP	477	1439	NP	1431	P	P	NP_C1439T	1998	385	1	13
10311	C57BL/6	F	BL6F	4X	ABCD	10	NP D480N	NP D480N	0.0733795	4	G	A	Var	Nonsyn	NP	480	1446	NP	1438	D	N	NP_G1446A	3435	2453	1	180
10304	C57BL/6	M	BL6M	1X	C	10	NP S482N	NP S482N	0.056015	1	G	A	Var	Nonsyn	NP	482	1453	NP	1445	S	N	NP_G1453A	3124	2660	0	149
97830	BALB/C	F	BALBF	1X	C	10	NP N483K	NP N483K	0.398464	13	T	A	Var	Nonsyn	NP	483	1457	NP	1449	N	K	NP_T1457A	3012	2605	0	1038
9517	BALB/C	M	BALBM	4X	ABCD	10	NP N483K	NP N483K	0.0519341	13	T	A	Var	Nonsyn	NP	483	1457	NP	1449	N	K	NP_T1457A	3012	2792	0	145
9500	BALB/C	M	BALBM	1X	C	10	NP N483K	NP N483K	0.877778	13	T	A	Var	Nonsyn	NP	483	1457	NP	1449	N	K	NP_T1457A	3012	90	0	79
9517	BALB/C	M	BALBM	4X	ABCD	10	NP D497N	NP D497N	0.0675883	7	G	A	Var	Nonsyn	NP	497	1497	NP	1489	D	N	NP_G1497A	1428	1302	0	88
9500	BALB/C	M	BALBM	1X	C	10	NP D497N	NP D497N	0.3	7	G	A	Var	Nonsyn	NP	497	1497	NP	1489	D	N	NP_G1497A	671	20	0	6
10311	C57BL/6	F	BL6F	4X	ABCD	10	NP D497N	NP D497N	0.13403	7	G	A	Var	Nonsyn	NP	497	1497	NP	1489	D	N	NP_G1497A	1428	1052	0	141
9515	BALB/C	M	BALBM	1X	A	10	NR I26V	NR I26V	0.0945946	1	A	G	Var	Nonsyn	NR	26	76	NR	76	I	V	NR_A76G	1310	74	2	7
9516	BALB/C	M	BALBM	2X	AB	10	NR A27T	NR A27T	0.0347826	1	G	A	Var	Nonsyn	NR	27	79	NR	79	A	T	NR_G79A	1296	345	0	12
9517	BALB/C	M	BALBM	4X	ABCD	10	NR T32T	NR T32T	0.0537682	1	T	C	Var	Syn	NR	32	96	NR	96	T	T	NR_T96C	3125	2269	0	122
10304	C57BL/6	M	BL6M	1X	C	10	NR E41E	NR E41E	0.0230303	1	G	A	Var	Syn	NR	41	123	NR	123	E	E	NR_G123A	1739	825	0	19
97680	BALB/C	F	BALBF	1X	A	10	NR C42Y	NR C42Y	0.0333168	2	G	A	Var	Nonsyn	NR	42	125	NR	125	C	Y	NR_G125A	3660	4022	0	134
97730	BALB/C	F	BALBF	1X	B	10	NR A46T	NR A46T	0.0322647	4	G	A	Var	Nonsyn	NR	46	136	NR	136	A	T	NR_G136A	3811	4866	0	157
10637	BALB/C	F	BALBF	2X	AB	Test (R11)	NR R60R	NR R60R	0.179487	1	G	A	Var	Syn	NR	60	180	NR	180	R	R	NR_G180A	2630	39	0	7
10314	C57BL/6	F	BL6F	1X	C	10	NR N61N	NR N61N	0.015186	1	C	T	Var	Syn	NR	61	183	NR	183	N	N	NR_C183T	2450	1317	0	20
97860	BALB/C	F	BALBF	2X	CD	10	NR I62T	NR I62T	0.0107612	1	T	C	Var	Nonsyn	NR	62	185	NR	185	I	T	NR_T185C	2717	3810	0	41
97690	BALB/C	F	BALBF	2X	AB	10	NR I62M	NR I62M	0.0143057	1	A	G	Var	Nonsyn	NR	62	186	NR	186	I	M	NR_A186G	5243	6431	0	92
97690	BALB/C	F	BALBF	2X	AB	10	NR V66M	NR V66M	0.0160256	2	G	A	Var	Nonsyn	NR	66	196	NR	196	V	M	NR_G196A	5306	6552	0	105
9516	BALB/C	M	BALBM	2X	AB	10	NR Y67Y	NR Y67Y	0.0215054	1	T	C	Var	Syn	NR	67	201	NR	201	Y	Y	NR_T201C	2811	651	0	14
10624	BALB/C	F	BALBF	2X	CD	Test (R11)	NR L68L	NR L68L	0.0379404	1	G	A	Var	Syn	NR	68	204	NR	204	L	L	NR_G204A	2643	369	1	14
9516	BALB/C	M	BALBM	2X	AB	10	NR N69N	NR N69N	0.0201439	2	T	C	Var	Syn	NR	69	207	NR	207	N	N	NR_T207C	2947	695	0	14
9740	C57BL/6	F	BL6F	1X	A	7	NR T72T	NR T72T	0.163636	1	C	T	Var	Syn	NR	72	216	NR	216	T	T	NR_C216T	3077	55	0	9
9516	BALB/C	M	BALBM	2X	AB	10	NR E76E	NR E76E	0.0231343	1	G	A	Var	Syn	NR	76	228	NR	228	E	E	NR_G228A	5821	1340	0	31
9516	BALB/C	M	BALBM	2X	AB	10	NR I77V	NR I77V	0.0291262	1	A	G	Var	Nonsyn	NR	77	229	NR	229	I	V	NR_A229G	5852	1339	4	39
9518	BALB/C	M	BALBM	1X	B	10	NR I77K	NR I77K	0.0681818	3	T	A	Var	Nonsyn	NR	77	230	NR	230	I	K	NR_T230A	3059	132	0	9
9739	C57BL/6	F	BL6F	2X	AB	7	NR Y84Y	NR Y84Y	0.0215827	2	C	T	Var	Syn	NR	84	252	NR	252	Y	Y	NR_C252T	2761	556	0	12
9515	BALB/C	M	BALBM	1X	A	10	NR W87R	NR W87R	0.0326797	1	T	C	Var	Nonsyn	NR	87	259	NR	259	W	R	NR_T259C	3138	153	0	5
10304	C57BL/6	M	BL6M	1X	C	10	NR S88P	NR S88P	0.0151007	1	T	C	Var	Nonsyn	NR	88	262	NR	262	S	P	NR_T262C	2567	1192	0	18
97860	BALB/C	F	BALBF	2X	CD	10	NR A98V	NR A98V	0.0277344	3	C	T	Var	Nonsyn	NR	98	293	NR	293	A	V	NR_C293T	5877	8329	2	231
9287	C57BL/6	F	BL6F	2X	CD	4	NR P99P	NR P99P	0.0186667	1	T	C	Var	Syn	NR	99	297	NR	297	P	P	NR_T297C	3257	750	1	14
97850	BALB/C	F	BALBF	4X	ABCD	10	NR L108I	NR L108I	0.54266	6	C	A	Var	Nonsyn	NR	108	322	NR	322	L	I	NR_C322A	5715	7548	0	4096
10317	C57BL/6	F	BL6F	1X	D	10	NR L108F	NR L108F	0.0301275	1	C	T	Var	Nonsyn	NR	108	322	NR	322	L	F	NR_C322T	2635	863	0	26
97850	BALB/C	F	BALBF	4X	ABCD	10	NR A110S	NR A110S	0.0222565	4	G	T	Var	Nonsyn	NR	110	328	NR	328	A	S	NR_G328T	5922	7773	0	173
97860	BALB/C	F	BALBF	2X	CD	10	NR A110V	NR A110V	0.0117845	1	C	T	Var	Nonsyn	NR	110	329	NR	329	A	V	NR_C329T	5865	8316	3	98
9518	BALB/C	M	BALBM	1X	B	10	NR G111G	NR G111G	0.0246914	1	T	C	Var	Syn	NR	111	333	NR	333	G	G	NR_T333C	2711	243	0	6
10311	C57BL/6	F	BL6F	4X	ABCD	10	NR D113N	NR D113N	0.0514076	3	G	A	Var	Nonsyn	NR	113	337	NR	337	D	N	NR_G337A	5814	1634	3	84
97730	BALB/C	F	BALBF	1X	B	10	NR T117T	NR T117T	0.0215169	3	G	T	Var	Syn	NR	117	351	NR	351	T	T	NR_G351T	5744	7436	3	160
10732	C57BL/6	F	BALBF	1XP	1XP	Test (R11)	NR T117T	NR T117T	0.0157532	3	G	T	Var	Syn	NR	117	351	NR	351	T	T	NR_G351T	5744	3047	3	48
9739	C57BL/6	F	BL6F	2X	AB	7	NR R118R	NR R118R	0.021611	1	A	G	Var	Syn	NR	118	354	NR	354	R	R	NR_A354G	2628	509	0	11
9516	BALB/C	M	BALBM	2X	AB	10	NR E119E	NR E119E	0.0277778	1	A	G	Var	Syn	NR	119	357	NR	357	E	E	NR_A357G	2660	468	1	13
97860	BALB/C	F	BALBF	2X	CD	10	NR L134L	NR L134L	0.0102108	1	C	A	Var	Syn	NR	134	402	NR	402	L	L	NR_C402A	5502	7541	0	77
9518	BALB/C	M	BALBM	1X	B	10	NR Q136Q	NR Q136Q	0.262467	3	G	A	Var	Syn	NR	136	408	NR	408	Q	Q	NR_G408A	5561	381	0	100
10317	C57BL/6	F	BL6F	1X	D	10	NR Q136Q	NR Q136Q	0.0272109	3	G	A	Var	Syn	NR	136	408	NR	408	Q	Q	NR_G408A	2894	441	0	12
9516	BALB/C	M	BALBM	2X	AB	10	NR H144H	NR H144H	0.969231	1	T	C	Var	Syn	NR	144	432	NR	432	H	H	NR_T432C	5304	1040	0	1008
10305	C57BL/6	M	BL6M	2X	CD	10	NR T148A	NR T148A	0.0135135	1	A	G	Var	Nonsyn	NR	148	442	NR	442	T	A	NR_A442G	2740	666	0	9
8245	C57BL/6	M	BL6M	Stock	D	1	NR R152R	NR R152R	0.045045	1	A	G	Var	Syn	NR	152	456	NR	456	R	R	NR_A456G	2709	222	0	10
9945	C57BL/6	F	BL6F	1X	D	7	NR P154P	NR P154P	0.0473684	1	T	C	Var	Syn	NR	154	462	NR	462	P	P	NR_T462C	2389	190	2	9
97680	BALB/C	F	BALBF	1X	A	10	NR L159L	NR L159L	0.0114082	1	T	C	Var	Syn	NR	159	475	NR	475	L	L	NR_T475C	2567	2805	0	32
9943	C57BL/6	F	BL6F	2X	CD	7	NR L163L	NR L163L	0.0582524	1	G	A	Var	Syn	NR	163	489	NR	489	L	L	NR_G489A	2696	103	0	6
9767	BALB/C	F	BALBF	1X	C	7	NR Q173Q	NR Q173Q	0.166667	2	A	G	Var	Syn	NR	173	519	NR	519	Q	Q	NR_A519G	2806	48	1	8
97830	BALB/C	F	BALBF	1X	C	10	NR Q173Q	NR Q173Q	0.0110735	2	A	G	Var	Syn	NR	173	519	NR	519	Q	Q	NR_A519G	5361	6502	2	72
8539	BALB/C	M	BALBM	Stock	D	1	NR C175C	NR C175C	0.0454545	3	T	C	Var	Syn	NR	175	525	NR	525	C	C	NR_T525C	3001	110	0	5
97860	BALB/C	F	BALBF	2X	CD	10	NR C175C	NR C175C	0.0150178	3	T	C	Var	Syn	NR	175	525	NR	525	C	C	NR_T525C	5667	7591	3	114
97860	BALB/C	F	BALBF	2X	CD	10	NR I176L	NR I176L	0.0217758	2	A	C	Var	Nonsyn	NR	176	526	NR	526	I	L	NR_A526C	5749	7715	0	168
9517	BALB/C	M	BALBM	4X	ABCD	10	NR S180S	NR S180S	0.046121	1	C	T	Var	Syn	NR	180	540	NR	540	S	S	NR_C540T	5332	3751	1	173
10311	C57BL/6	F	BL6F	4X	ABCD	10	NR G186G	NR G186G	0.0472393	2	A	G	Var	Syn	NR	186	558	NR	558	G	G	NR_A558G	5291	1630	0	77
9287	C57BL/6	F	BL6F	2X	CD	4	NR L190L	NR L190L	0.0131422	2	C	T	Var	Syn	NR	190	568	NR	568	L	L	NR_C568T	2540	837	0	11
9738	C57BL/6	F	BL6F	4X	ABCD	7	NR L190L	NR L190L	0.025788	2	C	T	Var	Syn	NR	190	568	NR	568	L	L	NR_C568T	2540	698	0	18
9518	BALB/C	M	BALBM	1X	B	10	NR V192A	NR V192A	0.029661	1	T	C	Var	Nonsyn	NR	192	575	NR	575	V	A	NR_T575C	2587	236	0	7
9945	C57BL/6	F	BL6F	1X	D	7	NR K199K	NR K199K	0.048	1	A	G	Var	Syn	NR	199	597	NR	597	K	K	NR_A597G	2879	125	1	6
97730	BALB/C	F	BALBF	1X	B	10	NR K199N	NR K199N	0.0121576	1	A	T	Var	Nonsyn	NR	199	597	NR	597	K	N	NR_A597T	5544	6827	0	83
10313	C57BL/6	F	BL6F	2X	AB	10	NR N200I	NR N200I	0.0159858	1	A	T	Var	Nonsyn	NR	200	599	NR	599	N	I	NR_A599T	2881	563	0	9
10311	C57BL/6	F	BL6F	4X	ABCD	10	NR D208N	NR D208N	0.0191972	3	G	A	Var	Nonsyn	NR	208	622	NR	622	D	N	NR_G622A	5475	1719	0	33
97730	BALB/C	F	BALBF	1X	B	10	NR D208D	NR D208D	0.0132856	2	C	T	Var	Syn	NR	208	624	NR	624	D	D	NR_C624T	5484	6699	2	89
10624	BALB/C	F	BALBF	2X	CD	Test (R11)	NR G209G	NR G209G	0.0433526	1	G	A	Var	Syn	NR	209	627	NR	627	G	G	NR_G627A	2565	346	0	15
10307	C57BL/6	M	BL6M	1X	D	10	NR V212V	NR V212V	0.0368298	1	G	A	Var	Syn	NR	212	636	NR	636	V	V	NR_G636A	5460	2145	0	79
9739	C57BL/6	F	BL6F	2X	AB	7	NR D213D	NR D213D	0.14686	2	C	T	Var	Syn	NR	213	639	NR	639	D	D	NR_C639T	5413	1035	0	152
10313	C57BL/6	F	BL6F	2X	AB	10	NR D213D	NR D213D	0.185675	2	C	T	Var	Syn	NR	213	639	NR	639	D	D	NR_C639T	5413	1438	0	267
97730	BALB/C	F	BALBF	1X	B	10	NR G216V	NR G216V	0.0099398	2	G	T	Var	Nonsyn	NR	216	647	NR	647	G	V	NR_G647T	5772	7143	0	71
10317	C57BL/6	F	BL6F	1X	D	10	NR N221D	NR N221D	0.02407	1	A	G	Var	Nonsyn	NR	221	661	NR	661	N	D	NR_A661G	2768	457	0	11
9536	BALB/C	M	BALBM	1X	D	10	NR N221N	NR N221N	0.0849057	3	T	C	Var	Syn	NR	221	663	NR	663	N	N	NR_T663C	2568	106	0	9
97850	BALB/C	F	BALBF	4X	ABCD	10	NR N221N	NR N221N	0.0124575	3	T	C	Var	Syn	NR	221	663	NR	663	N	N	NR_T663C	5329	7064	0	88
97850	BALB/C	F	BALBF	4X	ABCD	10	NR I222T	NR I222T	0.0647305	5	T	C	Var	Nonsyn	NR	222	665	NR	665	I	T	NR_T665C	5198	6921	0	448
9337	BALB/C	F	BALBF	2X	CD	4	NR T225T	NR T225T	0.357143	4	C	T	Var	Syn	NR	225	675	NR	675	T	T	NR_C675T	2465	14	0	5
97860	BALB/C	F	BALBF	2X	CD	10	NR T225T	NR T225T	0.0528559	4	C	T	Var	Syn	NR	225	675	NR	675	T	T	NR_C675T	5200	7038	0	372
10624	BALB/C	F	BALBF	2X	CD	Test (R11)	NR T225T	NR T225T	0.0806916	4	C	T	Var	Syn	NR	225	675	NR	675	T	T	NR_C675T	2465	347	0	28
97680	BALB/C	F	BALBF	1X	A	10	NR I233I	NR I233I	0.0190749	3	C	A	Var	Syn	NR	233	699	NR	699	I	I	NR_C699A	5174	5924	0	113
10724	C57BL/6	F	BALBF	1XP	1XP	Test (R11)	NR I233I	NR I233I	0.0115003	3	C	A	Var	Syn	NR	233	699	NR	699	I	I	NR_C699A	2701	1913	0	22
97730	BALB/C	F	BALBF	1X	B	10	NR N234S	NR N234S	0.0162826	3	A	G	Var	Nonsyn	NR	234	701	NR	701	N	S	NR_A701G	5161	6510	1	106
9518	BALB/C	M	BALBM	1X	B	10	NR T236T	NR T236T	0.029661	2	T	C	Var	Syn	NR	236	708	NR	708	T	T	NR_T708C	2471	236	0	7
10317	C57BL/6	F	BL6F	1X	D	10	NR S247P	NR S247P	0.015444	1	T	C	Var	Nonsyn	NR	247	739	NR	739	S	P	NR_T739C	2529	777	0	12
10624	BALB/C	F	BALBF	2X	CD	Test (R11)	NR S247S	NR S247S	0.0301003	1	A	G	Var	Syn	NR	247	741	NR	741	S	S	NR_A741G	2741	299	0	9
9293	C57BL/6	F	BL6F	1X	A	4	NR G248G	NR G248G	0.0361446	1	A	G	Var	Syn	NR	248	744	NR	744	G	G	NR_A744G	2720	249	4	9
10317	C57BL/6	F	BL6F	1X	D	10	NR S269S	NR S269S	0.0183066	1	A	C	Var	Syn	NR	269	807	NR	807	S	S	NR_A807C	2702	437	0	8
8325	C57BL/6	F	BL6F	Stock	C	1	NR G270G	NR G270G	0.0490196	1	A	G	Var	Syn	NR	270	810	NR	810	G	G	NR_A810G	2718	102	0	5
9287	C57BL/6	F	BL6F	2X	CD	4	NR P282P	NR P282P	0.0121012	2	T	C	Var	Syn	NR	282	846	NR	846	P	P	NR_T846C	2641	909	0	11
97850	BALB/C	F	BALBF	4X	ABCD	10	NR P282P	NR P282P	0.00907716	2	T	C	Var	Syn	NR	282	846	NR	846	P	P	NR_T846C	5489	7271	1	66
97830	BALB/C	F	BALBF	1X	C	10	NR Y284Y	NR Y284Y	0.0101069	2	T	C	Var	Syn	NR	284	852	NR	852	Y	Y	NR_T852C	5403	6827	0	69
10623	BALB/C	F	BALBF	1X	C	Test (R11)	NR Y284Y	NR Y284Y	0.0378788	2	T	C	Var	Syn	NR	284	852	NR	852	Y	Y	NR_T852C	2823	264	0	10
9750	BALB/C	F	BALBF	4X	ABCD	7	NR P285P	NR P285P	0.0700935	4	T	C	Var	Syn	NR	285	855	NR	855	P	P	NR_T855C	5341	428	2	30
97850	BALB/C	F	BALBF	4X	ABCD	10	NR P285P	NR P285P	0.0273649	4	T	C	Var	Syn	NR	285	855	NR	855	P	P	NR_T855C	5341	7199	2	197
97690	BALB/C	F	BALBF	2X	AB	10	NR P285P	NR P285P	0.0350195	2	T	A	Var	Syn	NR	285	855	NR	855	P	P	NR_T855A	5341	6425	0	225
8245	C57BL/6	M	BL6M	Stock	D	1	NR V287V	NR V287V	0.0334928	1	C	T	Var	Syn	NR	287	861	NR	861	V	V	NR_C861T	2840	209	0	7
9293	C57BL/6	F	BL6F	1X	A	4	NR R288R	NR R288R	0.0409836	1	A	G	Var	Syn	NR	288	864	NR	864	R	R	NR_A864G	2892	244	0	10
9536	BALB/C	M	BALBM	1X	D	10	NR C289Y	NR C289Y	0.116883	1	G	A	Var	Nonsyn	NR	289	866	NR	866	C	Y	NR_G866A	2707	77	1	9
97690	BALB/C	F	BALBF	2X	AB	10	NR I290I	NR I290I	0.0186944	1	C	A	Var	Syn	NR	290	870	NR	870	I	I	NR_C870A	5630	6740	0	126
10299	C57BL/6	M	BL6M	1X	A	10	NR R292I	NR R292I	0.0532319	1	G	T	Var	Nonsyn	NR	292	875	NR	875	R	I	NR_G875T	2919	263	0	14
9515	BALB/C	M	BALBM	1X	A	10	NR W295R	NR W295R	0.0352113	1	T	C	Var	Nonsyn	NR	295	883	NR	883	W	R	NR_T883C	2944	142	1	5
9740	C57BL/6	F	BL6F	1X	A	7	NR S298S	NR S298S	0.212121	1	T	C	Var	Syn	NR	298	894	NR	894	S	S	NR_T894C	2931	66	0	14
9297	C57BL/6	F	BL6F	2X	AB	4	NR N306N	NR N306N	0.015582	1	T	C	Var	Syn	NR	306	918	NR	918	N	N	NR_T918C	2764	1091	0	17
10314	C57BL/6	F	BL6F	1X	C	10	NR E308K	NR E308K	0.0140631	1	G	A	Var	Nonsyn	NR	308	922	NR	922	E	K	NR_G922A	5734	2631	0	37
10312	C57BL/6	F	BL6F	1X	B	10	NR S314S	NR S314S	0.0125984	1	C	T	Var	Syn	NR	314	942	NR	942	S	S	NR_C942T	3057	1270	2	16
9518	BALB/C	M	BALBM	1X	B	10	NR V317M	NR V317M	0.114094	1	G	A	Var	Nonsyn	NR	317	949	NR	949	V	M	NR_G949A	3185	149	0	17
8539	BALB/C	M	BALBM	Stock	D	1	NR G323G	NR G323G	0.059322	6	C	T	Var	Syn	NR	323	969	NR	969	G	G	NR_C969T	2742	118	2	7
9296	C57BL/6	F	BL6F	1X	B	4	NR G323G	NR G323G	0.0185387	2	C	A	Var	Syn	NR	323	969	NR	969	G	G	NR_C969A	2742	917	0	17
10009	C57BL/6	M	BL6M	4X	ABCD	10	NR G323G	NR G323G	0.645775	2	C	A	Var	Syn	NR	323	969	NR	969	G	G	NR_C969A	5713	1787	0	1154
97680	BALB/C	F	BALBF	1X	A	10	NR G323G	NR G323G	0.19245	6	C	T	Var	Syn	NR	323	969	NR	969	G	G	NR_C969T	5713	6490	5	1249
10649	BALB/C	F	BALBF	1XP	1XP	Test (R11)	NR G323G	NR G323G	0.206897	6	C	T	Var	Syn	NR	323	969	NR	969	G	G	NR_C969T	2742	58	2	12
10724	C57BL/6	F	BALBF	1XP	1XP	Test (R11)	NR G323G	NR G323G	0.103696	6	C	T	Var	Syn	NR	323	969	NR	969	G	G	NR_C969T	5713	3761	5	390
10732	C57BL/6	F	BALBF	1XP	1XP	Test (R11)	NR G323G	NR G323G	0.0880054	6	C	T	Var	Syn	NR	323	969	NR	969	G	G	NR_C969T	5713	2943	5	259
10305	C57BL/6	M	BL6M	2X	CD	10	NR D329D	NR D329D	0.197568	1	C	T	Var	Syn	NR	329	987	NR	987	D	D	NR_C987T	5908	1316	1	260
10312	C57BL/6	F	BL6F	1X	B	10	NR S332Y	NR S332Y	0.264082	2	C	A	Var	Nonsyn	NR	332	995	NR	995	S	Y	NR_C995A	6126	2734	2	722
10311	C57BL/6	F	BL6F	4X	ABCD	10	NR N336N	NR N336N	0.0487805	2	T	C	Var	Syn	NR	336	1008	NR	1008	N	N	NR_T1008C	6029	1558	1	76
9518	BALB/C	M	BALBM	1X	B	10	NR N339N	NR N339N	0.0634921	1	T	C	Var	Syn	NR	339	1017	NR	1017	N	N	NR_T1017C	6057	378	3	24
8235	C57BL/6	M	BL6M	Stock	C	1	NR E343E	NR E343E	0.0138675	1	G	A	Var	Syn	NR	343	1029	NR	1029	E	E	NR_G1029A	2997	649	0	9
97680	BALB/C	F	BALBF	1X	A	10	NR V349V	NR V349V	0.041957	3	G	T	Var	Syn	NR	349	1047	NR	1047	V	V	NR_G1047T	6272	7031	0	295
10724	C57BL/6	F	BALBF	1XP	1XP	Test (R11)	NR V349V	NR V349V	0.0289404	3	G	T	Var	Syn	NR	349	1047	NR	1047	V	V	NR_G1047T	6272	4181	0	121
10732	C57BL/6	F	BALBF	1XP	1XP	Test (R11)	NR V349V	NR V349V	0.0159607	3	G	T	Var	Syn	NR	349	1047	NR	1047	V	V	NR_G1047T	6272	3258	0	52
9337	BALB/C	F	BALBF	2X	CD	4	NR G357G	NR G357G	0.25	1	A	G	Var	Syn	NR	357	1071	NR	1071	G	G	NR_A1071G	2917	12	2	3
10299	C57BL/6	M	BL6M	1X	A	10	NR V360M	NR V360M	0.0253165	2	G	A	Var	Nonsyn	NR	360	1078	NR	1078	V	M	NR_G1078A	3327	316	1	8
10624	BALB/C	F	BALBF	2X	CD	Test (R11)	NR V360V	NR V360V	0.020202	1	G	A	Var	Syn	NR	360	1080	NR	1080	V	V	NR_G1080A	2861	396	0	8
10305	C57BL/6	M	BL6M	2X	CD	10	NR S372P	NR S372P	0.0125874	1	T	C	Var	Nonsyn	NR	372	1114	NR	1114	S	P	NR_T1114C	2793	715	0	9
9296	C57BL/6	F	BL6F	1X	B	4	NR F377F	NR F377F	0.0468972	2	C	T	Var	Syn	NR	377	1131	NR	1131	F	F	NR_C1131T	6392	2111	0	99
9737	C57BL/6	F	BL6F	1X	B	7	NR F377F	NR F377F	0.0226163	2	C	T	Var	Syn	NR	377	1131	NR	1131	F	F	NR_C1131T	6392	3891	0	88
97680	BALB/C	F	BALBF	1X	A	10	NR G382G	NR G382G	0.0427572	4	T	C	Var	Syn	NR	382	1146	NR	1146	G	G	NR_T1146C	5965	6572	2	281
10649	BALB/C	F	BALBF	1XP	1XP	Test (R11)	NR G382G	NR G382G	0.0616247	4	T	C	Var	Syn	NR	382	1146	NR	1146	G	G	NR_T1146C	2733	357	2	22
10724	C57BL/6	F	BALBF	1XP	1XP	Test (R11)	NR G382G	NR G382G	0.0161365	4	T	C	Var	Syn	NR	382	1146	NR	1146	G	G	NR_T1146C	5965	4338	2	70
10732	C57BL/6	F	BALBF	1XP	1XP	Test (R11)	NR G382G	NR G382G	0.0230011	4	T	C	Var	Syn	NR	382	1146	NR	1146	G	G	NR_T1146C	5965	3652	2	84
9516	BALB/C	M	BALBM	2X	AB	10	NR P386P	NR P386P	0.0199833	1	T	C	Var	Syn	NR	386	1158	NR	1158	P	P	NR_T1158C	3262	1201	2	24
9518	BALB/C	M	BALBM	1X	B	10	NR S388P	NR S388P	0.0252874	1	T	C	Var	Nonsyn	NR	388	1162	NR	1162	S	P	NR_T1162C	2903	435	0	11
9603	BALB/C	F	BALBF	2X	CD	7	NR S388S	NR S388S	0.0294118	1	C	T	Var	Syn	NR	388	1164	NR	1164	S	S	NR_C1164T	2993	306	1	9
9517	BALB/C	M	BALBM	4X	ABCD	10	NR I392T	NR I392T	0.0333833	1	T	C	Var	Nonsyn	NR	392	1175	NR	1175	I	T	NR_T1175C	6197	5332	2	178
9516	BALB/C	M	BALBM	2X	AB	10	NR I397V	NR I397V	0.0176516	1	A	G	Var	Nonsyn	NR	397	1189	NR	1189	I	V	NR_A1189G	3190	1303	1	23
9536	BALB/C	M	BALBM	1X	D	10	NR V398I	NR V398I	0.0295858	1	G	A	Var	Nonsyn	NR	398	1192	NR	1192	V	I	NR_G1192A	2843	507	1	15
97860	BALB/C	F	BALBF	2X	CD	10	NR D399N	NR D399N	0.0129473	4	G	A	Var	Nonsyn	NR	399	1195	NR	1195	D	N	NR_G1195A	3076	4248	1	55
97850	BALB/C	F	BALBF	4X	ABCD	10	NR D399E	NR D399E	0.0187144	5	C	A	Var	Nonsyn	NR	399	1197	NR	1197	D	E	NR_C1197A	5731	7374	1	138
97860	BALB/C	F	BALBF	2X	CD	10	NR N402K	NR N402K	0.342918	3	T	G	Var	Nonsyn	NR	402	1206	NR	1206	N	K	NR_T1206G	5549	7477	0	2564
10304	C57BL/6	M	BL6M	1X	C	10	NR R403W	NR R403W	0.0139459	1	C	T	Var	Nonsyn	NR	403	1207	NR	1207	R	W	NR_C1207T	3021	1219	3	17
97690	BALB/C	F	BALBF	2X	AB	10	NR R403Q	NR R403Q	0.0250232	4	G	A	Var	Nonsyn	NR	403	1208	NR	1208	R	Q	NR_G1208A	5646	6474	3	162
9515	BALB/C	M	BALBM	1X	A	10	NR R403R	NR R403R	0.0278989	1	G	A	Var	Syn	NR	403	1209	NR	1209	R	R	NR_G1209A	5529	1147	0	32
8541	BALB/C	M	BALBM	Stock	C	1	NR S404S	NR S404S	0.056338	1	A	G	Var	Syn	NR	404	1212	NR	1212	S	S	NR_A1212G	2594	142	1	8
8539	BALB/C	M	BALBM	Stock	D	1	NR G405G	NR G405G	0.0287356	1	T	C	Var	Syn	NR	405	1215	NR	1215	G	G	NR_T1215C	2543	348	2	10
10299	C57BL/6	M	BL6M	1X	A	10	NR G408G	NR G408G	0.200514	1	T	C	Var	Syn	NR	408	1224	NR	1224	G	G	NR_T1224C	5143	778	1	156
10305	C57BL/6	M	BL6M	2X	CD	10	NR I409T	NR I409T	0.0162338	1	T	C	Var	Nonsyn	NR	409	1226	NR	1226	I	T	NR_T1226C	2488	924	0	15
97830	BALB/C	F	BALBF	1X	C	10	NR G414S	NR G414S	0.0304493	3	G	A	Var	Nonsyn	NR	414	1240	NR	1240	G	S	NR_G1240A	5118	6010	2	183
9500	BALB/C	M	BALBM	1X	C	10	NR S416R	NR S416R	0.0666667	3	C	A	Var	Nonsyn	NR	416	1248	NR	1248	S	R	NR_C1248A	2260	90	0	6
9603	BALB/C	F	BALBF	2X	CD	7	NR C421C	NR C421C	0.0526316	3	C	T	Var	Syn	NR	421	1263	NR	1263	C	C	NR_C1263T	2166	304	0	16
9759	BALB/C	F	BALBF	2X	AB	7	NR C421C	NR C421C	0.0408163	3	C	T	Var	Syn	NR	421	1263	NR	1263	C	C	NR_C1263T	2166	245	0	10
10302	C57BL/6	M	BL6M	1X	B	10	NR C421C	NR C421C	0.0196629	3	C	T	Var	Syn	NR	421	1263	NR	1263	C	C	NR_C1263T	2442	356	0	7
9516	BALB/C	M	BALBM	2X	AB	10	NR I427T	NR I427T	0.0137812	2	T	C	Var	Nonsyn	NR	427	1280	NR	1280	I	T	NR_T1280C	2260	1161	0	16
97730	BALB/C	F	BALBF	1X	B	10	NR I427M	NR I427M	0.029572	9	A	G	Var	Nonsyn	NR	427	1281	NR	1281	I	M	NR_A1281G	4277	5140	1	152
97860	BALB/C	F	BALBF	2X	CD	10	NR I427M	NR I427M	0.067252	9	A	G	Var	Nonsyn	NR	427	1281	NR	1281	I	M	NR_A1281G	4277	5695	1	383
10623	BALB/C	F	BALBF	1X	C	Test (R11)	NR R428R	NR R428R	0.0192864	1	G	A	Var	Syn	NR	428	1284	NR	1284	R	R	NR_G1284A	2196	1037	1	20
9537	BALB/C	M	BALBM	2X	CD	10	NR G429E	NR G429E	0.0481283	1	G	A	Var	Nonsyn	NR	429	1286	NR	1286	G	E	NR_G1286A	1922	187	0	9
8235	C57BL/6	M	BL6M	Stock	C	1	NR G429G	NR G429G	0.0206795	22	A	G	Var	Syn	NR	429	1287	NR	1287	G	G	NR_A1287G	1879	677	0	14
8278	C57BL/6	M	BL6M	Stock	A	1	NR G429G	NR G429G	0.0229885	22	A	G	Var	Syn	NR	429	1287	NR	1287	G	G	NR_A1287G	2104	870	2	20
8312	C57BL/6	F	BL6F	Stock	D	1	NR G429G	NR G429G	0.037464	22	A	G	Var	Syn	NR	429	1287	NR	1287	G	G	NR_A1287G	3983	694	2	26
8325	C57BL/6	F	BL6F	Stock	C	1	NR G429G	NR G429G	0.0277778	22	A	G	Var	Syn	NR	429	1287	NR	1287	G	G	NR_A1287G	2104	396	2	11
8327	C57BL/6	F	BL6F	Stock	A	1	NR G429G	NR G429G	0.0195531	22	A	G	Var	Syn	NR	429	1287	NR	1287	G	G	NR_A1287G	2104	716	2	14
9293	C57BL/6	F	BL6F	1X	A	4	NR G429G	NR G429G	0.0200617	22	A	G	Var	Syn	NR	429	1287	NR	1287	G	G	NR_A1287G	2104	648	2	13
9321	BALB/C	F	BALBF	1X	B	4	NR G429G	NR G429G	0.0561798	22	A	G	Var	Syn	NR	429	1287	NR	1287	G	G	NR_A1287G	2104	178	2	10
9333	BALB/C	F	BALBF	4X	ABCD	4	NR G429G	NR G429G	0.0722892	22	A	G	Var	Syn	NR	429	1287	NR	1287	G	G	NR_A1287G	2104	83	2	6
9334	BALB/C	F	BALBF	1X	C	4	NR G429G	NR G429G	0.113636	22	A	G	Var	Syn	NR	429	1287	NR	1287	G	G	NR_A1287G	2104	44	2	5
9759	BALB/C	F	BALBF	2X	AB	7	NR G429G	NR G429G	0.0338983	22	A	G	Var	Syn	NR	429	1287	NR	1287	G	G	NR_A1287G	1879	236	0	8
9940	C57BL/6	F	BL6F	1X	C	7	NR G429G	NR G429G	0.0347826	22	A	G	Var	Syn	NR	429	1287	NR	1287	G	G	NR_A1287G	2104	230	2	8
9515	BALB/C	M	BALBM	1X	A	10	NR G429G	NR G429G	0.0244755	22	A	G	Var	Syn	NR	429	1287	NR	1287	G	G	NR_A1287G	2104	572	2	14
9536	BALB/C	M	BALBM	1X	D	10	NR G429G	NR G429G	0.0227273	22	A	G	Var	Syn	NR	429	1287	NR	1287	G	G	NR_A1287G	1879	528	0	12
10311	C57BL/6	F	BL6F	4X	ABCD	10	NR G429G	NR G429G	0.0159262	22	A	G	Var	Syn	NR	429	1287	NR	1287	G	G	NR_A1287G	2104	1193	2	19
10304	C57BL/6	M	BL6M	1X	C	10	NR G429G	NR G429G	0.0142388	22	A	G	Var	Syn	NR	429	1287	NR	1287	G	G	NR_A1287G	1879	913	0	13
10309	C57BL/6	F	BL6F	1X	A	10	NR G429G	NR G429G	0.016309	22	A	G	Var	Syn	NR	429	1287	NR	1287	G	G	NR_A1287G	1879	1165	0	19
10648	BALB/C	F	BALBF	4X	ABCD	Test (R11)	NR G429G	NR G429G	0.0297297	22	A	G	Var	Syn	NR	429	1287	NR	1287	G	G	NR_A1287G	2104	740	2	22
10623	BALB/C	F	BALBF	1X	C	Test (R11)	NR G429G	NR G429G	0.0146727	22	A	G	Var	Syn	NR	429	1287	NR	1287	G	G	NR_A1287G	1879	886	0	13
10624	BALB/C	F	BALBF	2X	CD	Test (R11)	NR G429G	NR G429G	0.0192661	22	A	G	Var	Syn	NR	429	1287	NR	1287	G	G	NR_A1287G	2104	1090	2	21
10649	BALB/C	F	BALBF	1XP	1XP	Test (R11)	NR G429G	NR G429G	0.0229645	22	A	G	Var	Syn	NR	429	1287	NR	1287	G	G	NR_A1287G	1879	479	0	11
9518	BALB/C	M	BALBM	1X	B	10	NR R430G	NR R430G	0.0318841	3	A	G	Var	Nonsyn	NR	430	1288	NR	1288	R	G	NR_A1288G	2100	345	0	11
10313	C57BL/6	F	BL6F	2X	AB	10	NR T439A	NR T439A	0.0344432	1	A	G	Var	Nonsyn	NR	439	1315	NR	1315	T	A	NR_A1315G	1628	871	1	30
9516	BALB/C	M	BALBM	2X	AB	10	NR V444I	NR V444I	0.0183078	1	G	A	Var	Nonsyn	NR	444	1330	NR	1330	V	I	NR_G1330A	2792	2021	0	37
9537	BALB/C	M	BALBM	2X	CD	10	NR A462S	NR A462S	0.133971	1	G	T	Var	Nonsyn	NR	462	1384	NR	1384	A	S	NR_G1384T	645	209	0	28
9500	BALB/C	M	BALBM	1X	C	10	NR N463D	NR N463D	0.10101	1	A	G	Var	Nonsyn	NR	463	1387	NR	1387	N	D	NR_A1387G	567	99	0	10
9517	BALB/C	M	BALBM	4X	ABCD	10	NR N463K	NR N463K	0.0510585	1	C	A	Var	Nonsyn	NR	463	1389	NR	1389	N	K	NR_C1389A	1181	1606	0	82
8600	BALB/C	F	BALBF	Stock	C	1	NS1 V18V	NS1 V18V	0.0273973	1	C	T	Var	Syn	NS	18	56	NS1	54	V	V	NS_C56T	5175	219	0	6
8539	BALB/C	M	BALBM	Stock	D	1	NS1 Q21Q	NS1 Q21Q	0.0114943	1	A	G	Var	Syn	NS	21	65	NS1	63	Q	Q	NS_A65G	5429	1653	2	19
97760	BALB/C	F	BALBF	1X	D	10	NS1 V23A	NS1 V23A	0.0144761	2	T	C	Var	Nonsyn	NS	23	70	NS1	68	V	A	NS_T70C	11187	6079	4	88
9518	BALB/C	M	BALBM	1X	B	10	NS1 V23A	NS1 V23A	0.165899	2	T	C	Var	Nonsyn	NS	23	70	NS1	68	V	A	NS_T70C	11187	3906	4	648
9737	C57BL/6	F	BL6F	1X	B	7	NS1 V23V	NS1 V23V	0.111225	2	A	T	Var	Syn	NS	23	71	NS1	69	V	V	NS_A71T	11251	7795	0	867
10312	C57BL/6	F	BL6F	1X	B	10	NS1 V23V	NS1 V23V	0.923701	2	A	T	Var	Syn	NS	23	71	NS1	69	V	V	NS_A71T	11251	8008	0	7397
9517	BALB/C	M	BALBM	4X	ABCD	10	NS1 E26K	NS1 E26K	0.945739	13	G	A	Var	Nonsyn	NS	26	78	NS1	76	E	K	NS_G78A	12627	10855	2	10266
10626	BALB/C	F	BALBF	1XP	1XP	Test (R11)	NS1 G28G	NS1 G28G	0.0172414	3	T	C	Var	Syn	NS	28	86	NS1	84	G	G	NS_T86C	6363	870	6	15
9517	BALB/C	M	BALBM	4X	ABCD	10	NS1 A30A	NS1 A30A	0.0123348	1	C	A	Var	Syn	NS	30	92	NS1	90	A	A	NS_C92A	13857	12485	1	154
10312	C57BL/6	F	BL6F	1X	B	10	NS1 R35R	NS1 R35R	0.0186872	1	C	A	Var	Syn	NS	35	105	NS1	103	R	R	NS_C105A	14682	10649	0	199
10305	C57BL/6	M	BL6M	2X	CD	10	NS1 L36L	NS1 L36L	0.0177235	2	T	C	Var	Syn	NS	36	110	NS1	108	L	L	NS_T110C	14677	11228	4	199
9337	BALB/C	F	BALBF	2X	CD	4	NS1 R38R	NS1 R38R	0.0271547	4	A	G	Var	Syn	NS	38	116	NS1	114	R	R	NS_A116G	7151	847	3	23
97860	BALB/C	F	BALBF	2X	CD	10	NS1 R38R	NS1 R38R	0.0117417	4	A	G	Var	Syn	NS	38	116	NS1	114	R	R	NS_A116G	14873	9198	3	108
9337	BALB/C	F	BALBF	2X	CD	4	NS1 R44R	NS1 R44R	0.0110442	5	G	A	Var	Syn	NS	44	134	NS1	132	R	R	NS_G134A	8615	996	2	11
10314	C57BL/6	F	BL6F	1X	C	10	NS1 R44R	NS1 R44R	0.0121353	5	G	A	Var	Syn	NS	44	134	NS1	132	R	R	NS_G134A	17688	12031	8	146
10626	BALB/C	F	BALBF	1XP	1XP	Test (R11)	NS1 R44R	NS1 R44R	0.0122271	5	G	A	Var	Syn	NS	44	134	NS1	132	R	R	NS_G134A	8615	1145	2	14
10649	BALB/C	F	BALBF	1XP	1XP	Test (R11)	NS1 R44R	NS1 R44R	0.0126417	5	G	A	Var	Syn	NS	44	134	NS1	132	R	R	NS_G134A	8615	2294	2	29
9500	BALB/C	M	BALBM	1X	C	10	NS1 G45E	NS1 G45E	0.037037	1	G	A	Var	Nonsyn	NS	45	136	NS1	134	G	E	NS_G136A	8448	270	2	10
9316	BALB/C	F	BALBF	2X	AB	4	NS1 G45G	NS1 G45G	0.118182	3	A	G	Var	Syn	NS	45	137	NS1	135	G	G	NS_A137G	8984	110	1	13
9758	BALB/C	F	BALBF	1X	A	7	NS1 G45G	NS1 G45G	0.0869565	3	A	G	Var	Syn	NS	45	137	NS1	135	G	G	NS_A137G	8402	46	1	4
10637	BALB/C	F	BALBF	2X	AB	Test (R11)	NS1 R46R	NS1 R46R	0.0107582	2	A	G	Var	Syn	NS	46	140	NS1	138	R	R	NS_A140G	8773	1952	5	21
10307	C57BL/6	M	BL6M	1X	D	10	NS1 G47S	NS1 G47S	0.00883758	2	G	A	Var	Nonsyn	NS	47	141	NS1	139	G	S	NS_G141A	18168	12560	1	111
10305	C57BL/6	M	BL6M	2X	CD	10	NS1 S48I	NS1 S48I	0.0108992	1	G	T	Var	Nonsyn	NS	48	145	NS1	143	S	I	NS_G145T	18269	13946	1	152
9536	BALB/C	M	BALBM	1X	D	10	NS1 T49T	NS1 T49T	0.0107681	12	T	C	Var	Syn	NS	49	149	NS1	147	T	T	NS_T149C	8901	2786	1	30
9459	C57BL/6	F	BL6F	1X	D	4	NS1 G51G	NS1 G51G	0.0296943	8	T	C	Var	Syn	NS	51	155	NS1	153	G	G	NS_T155C	8918	1145	1	34
97860	BALB/C	F	BALBF	2X	CD	10	NS1 G51G	NS1 G51G	0.0390688	8	T	C	Var	Syn	NS	51	155	NS1	153	G	G	NS_T155C	18673	11083	5	433
10624	BALB/C	F	BALBF	2X	CD	Test (R11)	NS1 G51G	NS1 G51G	0.0474448	8	T	C	Var	Syn	NS	51	155	NS1	153	G	G	NS_T155C	18673	8747	5	415
9500	BALB/C	M	BALBM	1X	C	10	NS1 N53S	NS1 N53S	0.0436242	3	A	G	Var	Nonsyn	NS	53	160	NS1	158	N	S	NS_A160G	9567	298	0	13
9518	BALB/C	M	BALBM	1X	B	10	NS1 I54I	NS1 I54I	0.0192278	4	C	T	Var	Syn	NS	54	164	NS1	162	I	I	NS_C164T	19779	6449	4	124
10637	BALB/C	F	BALBF	2X	AB	Test (R11)	NS1 I54I	NS1 I54I	0.016907	4	C	T	Var	Syn	NS	54	164	NS1	162	I	I	NS_C164T	10117	2011	2	34
9536	BALB/C	M	BALBM	1X	D	10	NS1 A57A	NS1 A57A	0.0158361	2	C	A	Var	Syn	NS	57	173	NS1	171	A	A	NS_C173A	10350	2147	3	34
9516	BALB/C	M	BALBM	2X	AB	10	NS1 Q63Q	NS1 Q63Q	0.0336965	2	G	A	Var	Syn	NS	63	191	NS1	189	Q	Q	NS_G191A	21975	10832	0	365
9517	BALB/C	M	BALBM	4X	ABCD	10	NS1 V65I	NS1 V65I	0.0375292	3	G	A	Var	Nonsyn	NS	65	195	NS1	193	V	I	NS_G195A	23070	21370	1	802
10304	C57BL/6	M	BL6M	1X	C	10	NS1 E66K	NS1 E66K	0.0573879	1	G	A	Var	Nonsyn	NS	66	198	NS1	196	E	K	NS_G198A	22986	16676	3	957
9518	BALB/C	M	BALBM	1X	B	10	NS1 R67K	NS1 R67K	0.0104656	4	G	A	Var	Nonsyn	NS	67	202	NS1	200	R	K	NS_G202A	22644	7453	5	78
9537	BALB/C	M	BALBM	2X	CD	10	NS1 R67K	NS1 R67K	0.0316547	4	G	A	Var	Nonsyn	NS	67	202	NS1	200	R	K	NS_G202A	22644	1390	5	44
9315	BALB/C	F	BALBF	1X	A	4	NS1 L69L	NS1 L69L	0.0121852	5	G	A	Var	Syn	NS	69	209	NS1	207	L	L	NS_G209A	11986	1231	2	15
10304	C57BL/6	M	BL6M	1X	C	10	NS1 L69L	NS1 L69L	0.0696221	5	G	A	Var	Syn	NS	69	209	NS1	207	L	L	NS_G209A	23409	16963	3	1181
10648	BALB/C	F	BALBF	4X	ABCD	Test (R11)	NS1 L69L	NS1 L69L	0.0107345	5	G	A	Var	Syn	NS	69	209	NS1	207	L	L	NS_G209A	11986	1770	2	19
9045	C57BL/6	F	BL6F	4X	ABCD	4	NS1 K70K	NS1 K70K	0.0269869	5	G	A	Var	Syn	NS	70	212	NS1	210	K	K	NS_G212A	23478	16823	6	454
9738	C57BL/6	F	BL6F	4X	ABCD	7	NS1 K70K	NS1 K70K	0.0398632	5	G	A	Var	Syn	NS	70	212	NS1	210	K	K	NS_G212A	23478	11991	6	478
9518	BALB/C	M	BALBM	1X	B	10	NS1 K70K	NS1 K70K	0.0104389	5	G	A	Var	Syn	NS	70	212	NS1	210	K	K	NS_G212A	11446	4215	2	44
10311	C57BL/6	F	BL6F	4X	ABCD	10	NS1 K70K	NS1 K70K	0.0291389	5	G	A	Var	Syn	NS	70	212	NS1	210	K	K	NS_G212A	23478	19836	6	578
97690	BALB/C	F	BALBF	2X	AB	10	NS1 E71K	NS1 E71K	0.0303698	5	G	A	Var	Nonsyn	NS	71	213	NS1	211	E	K	NS_G213A	23569	12249	0	372
9339	BALB/C	F	BALBF	1X	D	4	NS1 E71E	NS1 E71E	0.0496894	4	A	G	Var	Syn	NS	71	215	NS1	213	E	E	NS_A215G	11255	161	4	8
10307	C57BL/6	M	BL6M	1X	D	10	NS1 E72K	NS1 E72K	0.011077	2	G	A	Var	Nonsyn	NS	72	216	NS1	214	E	K	NS_G216A	23569	15979	4	177
9334	BALB/C	F	BALBF	1X	C	4	NS1 S73S	NS1 S73S	0.183486	12	C	T	Var	Syn	NS	73	221	NS1	219	S	S	NS_C221T	11627	327	2	60
9767	BALB/C	F	BALBF	1X	C	7	NS1 S73S	NS1 S73S	0.0248118	12	C	T	Var	Syn	NS	73	221	NS1	219	S	S	NS_C221T	24047	7174	4	178
9517	BALB/C	M	BALBM	4X	ABCD	10	NS1 S73S	NS1 S73S	0.0442741	12	C	T	Var	Syn	NS	73	221	NS1	219	S	S	NS_C221T	24047	22564	4	999
97830	BALB/C	F	BALBF	1X	C	10	NS1 S73S	NS1 S73S	0.0683025	12	C	T	Var	Syn	NS	73	221	NS1	219	S	S	NS_C221T	24047	12430	4	849
10623	BALB/C	F	BALBF	1X	C	Test (R11)	NS1 S73S	NS1 S73S	0.0292747	12	C	T	Var	Syn	NS	73	221	NS1	219	S	S	NS_C221T	24047	13732	4	402
10649	BALB/C	F	BALBF	1XP	1XP	Test (R11)	NS1 S73S	NS1 S73S	0.0153954	12	C	T	Var	Syn	NS	73	221	NS1	219	S	S	NS_C221T	11627	2858	2	44
9518	BALB/C	M	BALBM	1X	B	10	NS1 D74G	NS1 D74G	0.0118463	4	A	G	Var	Nonsyn	NS	74	223	NS1	221	D	G	NS_A223G	12204	3461	0	41
9518	BALB/C	M	BALBM	1X	B	10	NS1 E75E	NS1 E75E	0.00949367	3	G	A	Var	Syn	NS	75	227	NS1	225	E	E	NS_G227A	23391	7584	2	72
10317	C57BL/6	F	BL6F	1X	D	10	NS1 A76T	NS1 A76T	0.0114743	4	G	A	Var	Nonsyn	NS	76	228	NS1	226	A	T	NS_G228A	23309	12114	4	139
9315	BALB/C	F	BALBF	1X	A	4	NS1 L77L	NS1 L77L	0.0115416	4	T	C	Var	Syn	NS	77	233	NS1	231	L	L	NS_T233C	12030	1213	0	14
9537	BALB/C	M	BALBM	2X	CD	10	NS1 M79I	NS1 M79I	0.0356745	2	G	A	Var	Nonsyn	NS	79	239	NS1	237	M	I	NS_G239A	11311	897	1	32
9518	BALB/C	M	BALBM	1X	B	10	NS1 T80T	NS1 T80T	0.0110974	1	C	A	Var	Syn	NS	80	242	NS1	240	T	T	NS_C242A	11178	4055	3	45
10009	C57BL/6	M	BL6M	4X	ABCD	10	NS1 M81L	NS1 M81L	0.707931	10	A	T	Var	Nonsyn	NS	81	243	NS1	241	M	L	NS_A243T	23252	12949	3	9167
10305	C57BL/6	M	BL6M	2X	CD	10	NS1 M81L	NS1 M81L	0.641464	10	A	T	Var	Nonsyn	NS	81	243	NS1	241	M	L	NS_A243T	23252	17128	3	10987
10314	C57BL/6	F	BL6F	1X	C	10	NS1 M81I	NS1 M81I	0.0080529	1	G	A	Var	Nonsyn	NS	81	245	NS1	243	M	I	NS_G245A	23316	15274	4	123
9537	BALB/C	M	BALBM	2X	CD	10	NS1 A82A	NS1 A82A	0.0200445	2	C	A	Var	Syn	NS	82	248	NS1	246	A	A	NS_C248A	12026	449	1	9
9750	BALB/C	F	BALBF	4X	ABCD	7	NS1 L90L	NS1 L90L	0.0125651	5	A	G	Var	Syn	NS	90	272	NS1	270	L	L	NS_A272G	24189	13052	2	164
9333	BALB/C	F	BALBF	4X	ABCD	4	NS1 T91T	NS1 T91T	0.0117955	11	T	C	Var	Syn	NS	91	275	NS1	273	T	T	NS_T275C	11769	763	0	9
9537	BALB/C	M	BALBM	2X	CD	10	NS1 D92N	NS1 D92N	0.0136986	2	G	A	Var	Nonsyn	NS	92	276	NS1	274	D	N	NS_G276A	11887	876	1	12
9537	BALB/C	M	BALBM	2X	CD	10	NS1 I95T	NS1 I95T	0.0205011	3	T	C	Var	Nonsyn	NS	95	286	NS1	284	I	T	NS_T286C	11659	878	1	18
9321	BALB/C	F	BALBF	1X	B	4	NS1 E96E	NS1 E96E	0.0563758	11	G	A	Var	Syn	NS	96	290	NS1	288	E	E	NS_G290A	11835	745	2	42
97680	BALB/C	F	BALBF	1X	A	10	NS1 E96E	NS1 E96E	0.0127766	11	G	A	Var	Syn	NS	96	290	NS1	288	E	E	NS_G290A	24194	14010	4	179
97860	BALB/C	F	BALBF	2X	CD	10	NS1 E96E	NS1 E96E	0.0132398	11	G	A	Var	Syn	NS	96	290	NS1	288	E	E	NS_G290A	24194	13822	4	183
10649	BALB/C	F	BALBF	1XP	1XP	Test (R11)	NS1 E96E	NS1 E96E	0.00999254	11	G	A	Var	Syn	NS	96	290	NS1	288	E	E	NS_G290A	24194	6705	4	67
10304	C57BL/6	M	BL6M	1X	C	10	NS1 R100R	NS1 R100R	0.0176335	12	G	A	Var	Syn	NS	100	302	NS1	300	R	R	NS_G302A	24514	17410	5	307
97680	BALB/C	F	BALBF	1X	A	10	NS1 R100R	NS1 R100R	0.0100549	12	G	A	Var	Syn	NS	100	302	NS1	300	R	R	NS_G302A	24514	14023	5	141
10626	BALB/C	F	BALBF	1XP	1XP	Test (R11)	NS1 R100R	NS1 R100R	0.0115108	12	G	A	Var	Syn	NS	100	302	NS1	300	R	R	NS_G302A	11940	1390	3	16
97860	BALB/C	F	BALBF	2X	CD	10	NS1 D101N	NS1 D101N	0.103438	4	G	A	Var	Nonsyn	NS	101	303	NS1	301	D	N	NS_G303A	24373	13989	5	1447
10313	C57BL/6	F	BL6F	2X	AB	10	NS1 W102L	NS1 W102L	0.0163332	1	G	T	Var	Nonsyn	NS	102	307	NS1	305	W	L	NS_G307T	24939	15245	4	249
9334	BALB/C	F	BALBF	1X	C	4	NS1 L105L	NS1 L105L	0.0296296	1	A	G	Var	Syn	NS	105	317	NS1	315	L	L	NS_A317G	12750	135	2	4
97860	BALB/C	F	BALBF	2X	CD	10	NS1 M106I	NS1 M106I	0.0348331	9	G	A	Var	Nonsyn	NS	106	320	NS1	318	M	I	NS_G320A	25236	14469	6	504
9516	BALB/C	M	BALBM	2X	AB	10	NS1 M106I	NS1 M106I	0.0317275	9	G	A	Var	Nonsyn	NS	106	320	NS1	318	M	I	NS_G320A	25236	11977	6	380
10314	C57BL/6	F	BL6F	1X	C	10	NS1 Q109K	NS1 Q109K	0.190444	4	C	A	Var	Nonsyn	NS	109	327	NS1	325	Q	K	NS_C327A	25171	16325	1	3109
10313	C57BL/6	F	BL6F	2X	AB	10	NS1 R118K	NS1 R118K	0.871948	6	G	A	Var	Nonsyn	NS	118	355	NS1	353	R	K	NS_G355A	26286	15275	1	13319
10300	C57BL/6	M	BL6M	2X	AB	10	NS1 Q121R	NS1 Q121R	0.222863	2	A	G	Var	Nonsyn	NS	121	364	NS1	362	Q	R	NS_A364G	25552	15615	20	3480
97680	BALB/C	F	BALBF	1X	A	10	NS1 Q121Q	NS1 Q121Q	0.0149305	7	G	A	Var	Syn	NS	121	365	NS1	363	Q	Q	NS_G365A	25704	14467	9	216
10649	BALB/C	F	BALBF	1XP	1XP	Test (R11)	NS1 Q121Q	NS1 Q121Q	0.014667	7	G	A	Var	Syn	NS	121	365	NS1	363	Q	Q	NS_G365A	13110	4159	5	61
10302	C57BL/6	M	BL6M	1X	B	10	NS1 I123I	NS1 I123I	0.0311597	2	C	T	Var	Syn	NS	123	371	NS1	369	I	I	NS_C371T	25701	7959	3	248
9537	BALB/C	M	BALBM	2X	CD	10	NS1 D125N	NS1 D125N	0.0475162	5	G	A	Var	Nonsyn	NS	125	375	NS1	373	D	N	NS_G375A	12967	926	1	44
9516	BALB/C	M	BALBM	2X	AB	10	NS1 D125G	NS1 D125G	0.0108082	7	A	G	Var	Nonsyn	NS	125	376	NS1	374	D	G	NS_A376G	25642	12398	3	134
9738	C57BL/6	F	BL6F	4X	ABCD	7	NS1 K126K	NS1 K126K	0.0280593	8	G	A	Var	Syn	NS	126	380	NS1	378	K	K	NS_G380A	26205	13222	1	371
10311	C57BL/6	F	BL6F	4X	ABCD	10	NS1 K126K	NS1 K126K	0.158138	8	G	A	Var	Syn	NS	126	380	NS1	378	K	K	NS_G380A	26205	21399	1	3384
10648	BALB/C	F	BALBF	4X	ABCD	Test (R11)	NS1 K126K	NS1 K126K	0.0277942	8	G	A	Var	Syn	NS	126	380	NS1	378	K	K	NS_G380A	13325	1691	0	47
9873	BALB/C	F	BALBF	1X	D	7	NS1 I128I	NS1 I128I	0.0714286	2	C	T	Var	Syn	NS	128	386	NS1	384	I	I	NS_C386T	12665	42	0	3
9518	BALB/C	M	BALBM	1X	B	10	NS1 K131K	NS1 K131K	0.0120773	8	A	G	Var	Syn	NS	131	395	NS1	393	K	K	NS_A395G	25599	7866	15	95
9333	BALB/C	F	BALBF	4X	ABCD	4	NS1 A132A	NS1 A132A	0.0113636	3	G	A	Var	Syn	NS	132	398	NS1	396	A	A	NS_G398A	12596	792	4	9
9945	C57BL/6	F	BL6F	1X	D	7	NS1 A132A	NS1 A132A	0.08221	3	G	A	Var	Syn	NS	132	398	NS1	396	A	A	NS_G398A	25724	6009	10	494
10317	C57BL/6	F	BL6F	1X	D	10	NS1 A132A	NS1 A132A	0.0112755	3	G	A	Var	Syn	NS	132	398	NS1	396	A	A	NS_G398A	25724	12771	10	144
10625	BALB/C	F	BALBF	4X	ABCD	Test (R11)	NS1 S135S	NS1 S135S	0.0430108	3	T	C	Var	Syn	NS	135	407	NS1	405	S	S	NS_T407C	12927	93	3	4
9500	BALB/C	M	BALBM	1X	C	10	NS1 V136M	NS1 V136M	0.0547945	3	G	A	Var	Nonsyn	NS	136	408	NS1	406	V	M	NS_G408A	12578	292	1	16
9536	BALB/C	M	BALBM	1X	D	10	NS1 F138F	NS1 F138F	0.0169787	2	T	C	Var	Syn	NS	138	416	NS1	414	F	F	NS_T416C	12940	2297	2	39
9334	BALB/C	F	BALBF	1X	C	4	NS1 D139D	NS1 D139D	0.0629371	2	C	T	Var	Syn	NS	139	419	NS1	417	D	D	NS_C419T	12810	143	6	9
10302	C57BL/6	M	BL6M	1X	B	10	NS1 D139D	NS1 D139D	0.0193331	2	C	T	Var	Syn	NS	139	419	NS1	417	D	D	NS_C419T	25074	7707	8	149
9337	BALB/C	F	BALBF	2X	CD	4	NS1 R140R	NS1 R140R	0.0469376	9	G	A	Var	Syn	NS	140	422	NS1	420	R	R	NS_G422A	25441	1747	6	82
9603	BALB/C	F	BALBF	2X	CD	7	NS1 R140R	NS1 R140R	0.0218154	9	G	A	Var	Syn	NS	140	422	NS1	420	R	R	NS_G422A	25441	3988	6	87
97860	BALB/C	F	BALBF	2X	CD	10	NS1 R140R	NS1 R140R	0.0133482	9	G	A	Var	Syn	NS	140	422	NS1	420	R	R	NS_G422A	25441	14309	6	191
10624	BALB/C	F	BALBF	2X	CD	Test (R11)	NS1 R140R	NS1 R140R	0.014027	9	G	A	Var	Syn	NS	140	422	NS1	420	R	R	NS_G422A	25441	11264	6	158
10314	C57BL/6	F	BL6F	1X	C	10	NS1 E153E	NS1 E153E	0.0868198	1	G	A	Var	Syn	NS	153	461	NS1	459	E	E	NS_G461A	24851	15584	1	1353
10300	C57BL/6	M	BL6M	2X	AB	10	NS1 V157A	NS1 V157A	0.00962355	2	T	C	Var	Nonsyn	NS	157	472	NS1	470	V	A	NS_T472C	23937	14132	2	136
8542	BALB/C	M	BALBM	Stock	A	1	NS1 V157V	NS1 V157V	0.0107053	2	T	C	Var	Syn	NS	157	473	NS1	471	V	V	NS_T473C	11729	1588	0	17
8547	BALB/C	M	BALBM	Stock	B	1	NS1 G158G	NS1 G158G	0.0222309	4	C	T	Var	Syn	NS	158	476	NS1	474	G	G	NS_C476T	12553	2564	4	57
10313	C57BL/6	F	BL6F	2X	AB	10	NS1 G158G	NS1 G158G	0.0127273	4	C	T	Var	Syn	NS	158	476	NS1	474	G	G	NS_C476T	24434	14300	9	182
9500	BALB/C	M	BALBM	1X	C	10	NS1 I160I	NS1 I160I	0.0885609	2	C	A	Var	Syn	NS	160	482	NS1	480	I	I	NS_C482A	11866	271	1	24
10300	C57BL/6	M	BL6M	2X	AB	10	NS1 I160I	NS1 I160I	0.72869	2	C	A	Var	Syn	NS	160	482	NS1	480	I	I	NS_C482A	24650	14629	2	10660
9337	BALB/C	F	BALBF	2X	CD	4	NS1 S161S	NS1 S161S	0.0346348	7	A	C	Var	Syn	NS	161	485	NS1	483	S	S	NS_A485C	24532	1588	3	55
9603	BALB/C	F	BALBF	2X	CD	7	NS1 S161S	NS1 S161S	0.0406504	7	A	C	Var	Syn	NS	161	485	NS1	483	S	S	NS_A485C	24532	3690	3	150
8600	BALB/C	F	BALBF	Stock	C	1	NS1 L163L	NS1 L163L	0.0197531	8	T	C	Var	Syn	NS	163	489	NS1	487	L	L	NS_T489C	11977	405	7	8
9518	BALB/C	M	BALBM	1X	B	10	NS1 L166I	NS1 L166I	0.0152284	3	C	A	Var	Nonsyn	NS	166	498	NS1	496	L	I	NS_C498A	24876	7289	5	111
9537	BALB/C	M	BALBM	2X	CD	10	NS1 L166H	NS1 L166H	0.62607	2	T	A	Var	Nonsyn	NS	166	499	NS1	497	L	H	NS_T499A	24827	1051	0	658
9333	BALB/C	F	BALBF	4X	ABCD	4	NS1 L166L	NS1 L166L	0.124095	11	T	C	Var	Syn	NS	166	500	NS1	498	L	L	NS_T500C	24586	967	1	120
9750	BALB/C	F	BALBF	4X	ABCD	7	NS1 L166L	NS1 L166L	0.0992294	11	T	C	Var	Syn	NS	166	500	NS1	498	L	L	NS_T500C	24586	12587	1	1249
97850	BALB/C	F	BALBF	4X	ABCD	10	NS1 L166L	NS1 L166L	0.0116189	11	T	C	Var	Syn	NS	166	500	NS1	498	L	L	NS_T500C	24586	12910	1	150
10648	BALB/C	F	BALBF	4X	ABCD	Test (R11)	NS1 L166L	NS1 L166L	0.012976	11	T	C	Var	Syn	NS	166	500	NS1	498	L	L	NS_T500C	24586	3545	1	46
97850	BALB/C	F	BALBF	4X	ABCD	10	NS1 G168E ; NS2_NEP D11N	NS1 G168E ; NS2_NEP D11N	0.619172	15	G	A	Var	Nonsyn; Nonsyn	NS	168; 11	505	NS1; NS2_NEP	503; 31	G; D	E; N	NS_G505A	25150	13061	0	8087
9536	BALB/C	M	BALBM	1X	D	10	NS1 G168E ; NS2_NEP D11N	NS1 G168E ; NS2_NEP D11N	0.942175	15	G	A	Var	Nonsyn; Nonsyn	NS	168; 11	505	NS1; NS2_NEP	503; 31	G; D	E; N	NS_G505A	25150	5067	0	4774
10300	C57BL/6	M	BL6M	2X	AB	10	NS1 G168E ; NS2_NEP D11N	NS1 G168E ; NS2_NEP D11N	0.0403132	15	G	A	Var	Nonsyn; Nonsyn	NS	168; 11	505	NS1; NS2_NEP	503; 31	G; D	E; N	NS_G505A	25150	14685	0	592
9537	BALB/C	M	BALBM	2X	CD	10	NS1 H169R ; NS2_NEP I12V	NS1 H169R ; NS2_NEP I12V	0.0126984	6	A	G	Var	Nonsyn; Nonsyn	NS	169; 12	508	NS1; NS2_NEP	506; 34	H; I	R; V	NS_A508G	12929	315	0	4
9518	BALB/C	M	BALBM	1X	B	10	NS1 G179R ; NS2_NEP L21L	NS1 G179R ; NS2_NEP L21L	0.307932	6	G	A	Var	Nonsyn; Syn	NS	179; 21	537	NS1; NS2_NEP	535; 63	G; L	R; L	NS_G537A	24363	7047	3	2170
9537	BALB/C	M	BALBM	2X	CD	10	NS1 G179R ; NS2_NEP L21L	NS1 G179R ; NS2_NEP L21L	0.0851735	6	G	A	Var	Nonsyn; Syn	NS	179; 21	537	NS1; NS2_NEP	535; 63	G; L	R; L	NS_G537A	12589	317	3	27
97860	BALB/C	F	BALBF	2X	CD	10	NS1 G179E ; NS2_NEP G22R	NS1 G179E ; NS2_NEP G22R	0.218784	11	G	A	Var	Nonsyn; Nonsyn	NS	179; 22	538	NS1; NS2_NEP	536; 64	G; G	E; R	NS_G538A	24003	12990	2	2842
9500	BALB/C	M	BALBM	1X	C	10	NS1 G179E ; NS2_NEP G22R	NS1 G179E ; NS2_NEP G22R	0.386076	11	G	A	Var	Nonsyn; Nonsyn	NS	179; 22	538	NS1; NS2_NEP	536; 64	G; G	E; R	NS_G538A	24003	316	2	122
9500	BALB/C	M	BALBM	1X	C	10	NS1 V180A ; NS2_NEP S23P	NS1 V180A ; NS2_NEP S23P	0.0651341	8	T	C	Var	Nonsyn; Nonsyn	NS	180; 23	541	NS1; NS2_NEP	539; 67	V; S	A; P	NS_T541C	11404	261	7	17
97830	BALB/C	F	BALBF	1X	C	10	NS1 G183R ; NS2_NEP S25S	NS1 G183R ; NS2_NEP S25S	0.817122	27	G	A	Var	Nonsyn; Syn	NS	183; 25	549	NS1; NS2_NEP	547; 75	G; S	R; S	NS_G549A	24480	11412	7	9325
10311	C57BL/6	F	BL6F	4X	ABCD	10	NS1 G183R ; NS2_NEP S25S	NS1 G183R ; NS2_NEP S25S	0.110773	27	G	A	Var	Nonsyn; Syn	NS	183; 25	549	NS1; NS2_NEP	547; 75	G; S	R; S	NS_G549A	24480	19075	7	2113
10300	C57BL/6	M	BL6M	2X	AB	10	NS1 G183R ; NS2_NEP S25S	NS1 G183R ; NS2_NEP S25S	0.19911	27	G	A	Var	Nonsyn; Syn	NS	183; 25	549	NS1; NS2_NEP	547; 75	G; S	R; S	NS_G549A	24480	14374	7	2862
10305	C57BL/6	M	BL6M	2X	CD	10	NS1 G183R ; NS2_NEP S25S	NS1 G183R ; NS2_NEP S25S	0.0814654	27	G	A	Var	Nonsyn; Syn	NS	183; 25	549	NS1; NS2_NEP	547; 75	G; S	R; S	NS_G549A	24480	17087	7	1392
97690	BALB/C	F	BALBF	2X	AB	10	NS1 G183E ; NS2_NEP E26K	NS1 G183E ; NS2_NEP E26K	0.979911	31	G	A	Var	Nonsyn; Nonsyn	NS	183; 26	550	NS1; NS2_NEP	548; 76	G; E	E; K	NS_G550A	24500	11449	6	11219
97850	BALB/C	F	BALBF	4X	ABCD	10	NS1 G183E ; NS2_NEP E26K	NS1 G183E ; NS2_NEP E26K	0.228026	31	G	A	Var	Nonsyn; Nonsyn	NS	183; 26	550	NS1; NS2_NEP	548; 76	G; E	E; K	NS_G550A	24500	12788	6	2916
97730	BALB/C	F	BALBF	1X	B	10	NS1 G183E ; NS2_NEP E26K	NS1 G183E ; NS2_NEP E26K	0.927956	31	G	A	Var	Nonsyn; Nonsyn	NS	183; 26	550	NS1; NS2_NEP	548; 76	G; E	E; K	NS_G550A	24500	12534	6	11631
97760	BALB/C	F	BALBF	1X	D	10	NS1 G183E ; NS2_NEP E26K	NS1 G183E ; NS2_NEP E26K	0.999123	31	G	A	Var	Nonsyn; Nonsyn	NS	183; 26	550	NS1; NS2_NEP	548; 76	G; E	E; K	NS_G550A	24500	11404	6	11394
9536	BALB/C	M	BALBM	1X	D	10	NS1 G183E ; NS2_NEP E26K	NS1 G183E ; NS2_NEP E26K	0.915351	31	G	A	Var	Nonsyn; Nonsyn	NS	183; 26	550	NS1; NS2_NEP	548; 76	G; E	E; K	NS_G550A	24500	5068	6	4639
10009	C57BL/6	M	BL6M	4X	ABCD	10	NS1 G183E ; NS2_NEP E26K	NS1 G183E ; NS2_NEP E26K	0.238963	31	G	A	Var	Nonsyn; Nonsyn	NS	183; 26	550	NS1; NS2_NEP	548; 76	G; E	E; K	NS_G550A	24500	12730	6	3042
9517	BALB/C	M	BALBM	4X	ABCD	10	NS1 G184V ; NS2_NEP D27Y	NS1 G184V ; NS2_NEP D27Y	0.0117925	2	G	T	Var	Nonsyn; Nonsyn	NS	184; 27	553	NS1; NS2_NEP	551; 79	G; D	V; Y	NS_G553T	24143	21200	1	250
9537	BALB/C	M	BALBM	2X	CD	10	NS1 G184E ; NS2_NEP D27N	NS1 G184E ; NS2_NEP D27N	0.0466102	4	G	A	Var	Nonsyn; Nonsyn	NS	184; 27	553	NS1; NS2_NEP	551; 79	G; D	E; N	NS_G553A	11657	708	2	33
9516	BALB/C	M	BALBM	2X	AB	10	NS1 W187C ; NS2_NEP G30V	NS1 W187C ; NS2_NEP G30V	0.109533	2	G	T	Var	Nonsyn; Nonsyn	NS	187; 30	563	NS1; NS2_NEP	561; 89	W; G	C; V	NS_G563T	24300	11193	0	1226
10220	C57BL/6	F	BL6F	2X	CD	10	NS1 W187C ; NS2_NEP G30V	NS1 W187C ; NS2_NEP G30V	0.0108764	2	G	T	Var	Nonsyn; Nonsyn	NS	187; 30	563	NS1; NS2_NEP	561; 89	W; G	C; V	NS_G563T	24300	14251	0	155
97680	BALB/C	F	BALBF	1X	A	10	NS1 D189N ; NS2_NEP M31I	NS1 D189N ; NS2_NEP M31I	0.0597332	17	G	A	Var	Nonsyn; Nonsyn	NS	189; 31	567	NS1; NS2_NEP	565; 93	D; M	N; I	NS_G567A	24473	13192	5	788
9516	BALB/C	M	BALBM	2X	AB	10	NS1 D189E ; NS2_NEP I32R	NS1 D189E ; NS2_NEP I32R	0.00823478	2	T	G	Var	Nonsyn; Nonsyn	NS	189; 32	569	NS1; NS2_NEP	567; 95	D; I	E; R	NS_T569G	24451	11415	1	94
9517	BALB/C	M	BALBM	4X	ABCD	10	NS1 D189E ; NS2_NEP I32R	NS1 D189E ; NS2_NEP I32R	0.957677	2	T	G	Var	Nonsyn; Nonsyn	NS	189; 32	569	NS1; NS2_NEP	567; 95	D; I	E; R	NS_T569G	24451	20934	1	20048
9537	BALB/C	M	BALBM	2X	CD	10	NS1 K196E ; NS2_NEP L38L	NS1 K196E ; NS2_NEP L38L	0.0298103	1	A	G	Var	Nonsyn; Syn	NS	196; 38	588	NS1; NS2_NEP	586; 114	K; L	E; L	NS_A588G	11571	738	0	22
10304	C57BL/6	M	BL6M	1X	C	10	NS1 A202T ; NS2_NEP S44S	NS1 A202T ; NS2_NEP S44S	0.463991	8	G	A	Var	Nonsyn; Syn	NS	202; 44	606	NS1; NS2_NEP	604; 132	A; S	T; S	NS_G606A	22762	15399	1	7145
9537	BALB/C	M	BALBM	2X	CD	10	NS1 G204E ; NS2_NEP E47K	NS1 G204E ; NS2_NEP E47K	0.012605	6	G	A	Var	Nonsyn; Nonsyn	NS	204; 47	613	NS1; NS2_NEP	611; 139	G; E	E; K	NS_G613A	11296	714	5	9
9537	BALB/C	M	BALBM	2X	CD	10	NS1 G204G ; NS2_NEP E47G	NS1 G204G ; NS2_NEP E47G	0.0445305	9	A	G	Var	Syn; Nonsyn	NS	204; 47	614	NS1; NS2_NEP	612; 140	G; E	G; G	NS_A614G	23459	1033	6	46
10312	C57BL/6	F	BL6F	1X	B	10	NS1 G210W ; NS2_NEP M52I	NS1 G210W ; NS2_NEP M52I	0.0508281	3	G	T	Var	Nonsyn; Nonsyn	NS	210; 52	630	NS1; NS2_NEP	628; 156	G; M	W; I	NS_G630T	23150	14854	5	755
10305	C57BL/6	M	BL6M	2X	CD	10	NS1 P213S ; NS2_NEP L55L	NS1 P213S ; NS2_NEP L55L	0.018598	2	C	T	Var	Nonsyn; Syn	NS	213; 55	639	NS1; NS2_NEP	637; 165	P; L	S; L	NS_C639T	22480	15378	1	286
97690	BALB/C	F	BALBF	2X	AB	10	NS1 R220W ; NS2_NEP N62N	NS1 R220W ; NS2_NEP N62N	0.0138075	5	C	T	Var	Nonsyn; Syn	NS	220; 62	660	NS1; NS2_NEP	658; 186	R; N	W; N	NS_C660T	20880	9560	8	132
9517	BALB/C	M	BALBM	4X	ABCD	10	NS1 R220Q ; NS2_NEP G63R	NS1 R220Q ; NS2_NEP G63R	0.0239616	14	G	A	Var	Nonsyn; Nonsyn	NS	220; 63	661	NS1; NS2_NEP	659; 187	R; G	Q; R	NS_G661A	21019	17695	6	424
9536	BALB/C	M	BALBM	1X	D	10	NS1 R220Q ; NS2_NEP G63R	NS1 R220Q ; NS2_NEP G63R	0.0164492	14	G	A	Var	Nonsyn; Nonsyn	NS	220; 63	661	NS1; NS2_NEP	659; 187	R; G	Q; R	NS_G661A	10845	1763	0	29
97830	BALB/C	F	BALBF	1X	C	10	NS1 A223E ; NS2_NEP R66R	NS1 A223E ; NS2_NEP R66R	0.0895298	7	C	A	Var	Nonsyn; Syn	NS	223; 66	670	NS1; NS2_NEP	668; 196	A; R	E; R	NS_C670A	20684	9293	2	832
9516	BALB/C	M	BALBM	2X	AB	10	NS1 R224K ; NS2_NEP E67K	NS1 R224K ; NS2_NEP E67K	0.0217322	3	G	A	Var	Nonsyn; Nonsyn	NS	224; 67	673	NS1; NS2_NEP	671; 199	R; E	K; K	NS_G673A	20654	9387	3	204
9517	BALB/C	M	BALBM	4X	ABCD	10	NS1 V226I ; NS2_NEP Q68Q	NS1 V226I ; NS2_NEP Q68Q	0.0411978	8	G	A	Var	Nonsyn; Syn	NS	226; 68	678	NS1; NS2_NEP	676; 204	V; Q	I; Q	NS_G678A	20494	17064	0	703
97860	BALB/C	F	BALBF	2X	CD	10	NS1 V230I ; NS2_NEP K72K	NS1 V230I ; NS2_NEP K72K	0.0088128	8	G	A	Var	Nonsyn; Syn	NS	230; 72	690	NS1; NS2_NEP	688; 216	V; K	I; K	NS_G690A	19272	9872	1	87
9517	BALB/C	M	BALBM	4X	ABCD	10	NS1 V230I ; NS2_NEP K72K	NS1 V230I ; NS2_NEP K72K	0.016585	8	G	A	Var	Nonsyn; Syn	NS	230; 72	690	NS1; NS2_NEP	688; 216	V; K	I; K	NS_G690A	19272	15918	1	264
10302	C57BL/6	M	BL6M	1X	B	10	NS1 R231* ; NS2_NEP F73F	NS1 R231* ; NS2_NEP F73F	0.0151355	2	C	T	Var	Stop; Syn	NS	231; 73	693	NS1; NS2_NEP	691; 219	R; F	*; F	NS_C693T	18834	5682	2	86
9515	BALB/C	M	BALBM	1X	A	10	NS1 K234E ; NS2_NEP I76M	NS1 K234E ; NS2_NEP I76M	0.999636	4	A	G	Var	Nonsyn; Nonsyn	NS	234; 76	702	NS1; NS2_NEP	700; 228	K; I	E; M	NS_A702G	18900	5487	5	5485
10009	C57BL/6	M	BL6M	4X	ABCD	10	NS1 M235V ; NS2_NEP R77R	NS1 M235V ; NS2_NEP R77R	0.615622	4	A	G	Var	Nonsyn; Syn	NS	235; 77	705	NS1; NS2_NEP	703; 231	M; R	V; R	NS_A705G	18631	9064	7	5580
9316	BALB/C	F	BALBF	2X	AB	4	NS2_NEP V83V	NS2_NEP V83V	0.0687831	2	G	A	Var	Syn	NS	83	723	NS2_NEP	249	V	V	NS_G723A	8074	189	0	13
9337	BALB/C	F	BALBF	2X	CD	4	NS2_NEP R84R	NS2_NEP R84R	0.0393701	2	A	G	Var	Syn	NS	84	726	NS2_NEP	252	R	R	NS_A726G	16691	1143	19	45
10626	BALB/C	F	BALBF	1XP	1XP	Test (R11)	NS2_NEP L87L	NS2_NEP L87L	0.026936	4	G	A	Var	Syn	NS	87	735	NS2_NEP	261	L	L	NS_G735A	15715	1188	0	32
9759	BALB/C	F	BALBF	2X	AB	7	NS2_NEP K88K	NS2_NEP K88K	0.0317919	7	G	A	Var	Syn	NS	88	738	NS2_NEP	264	K	K	NS_G738A	7549	346	0	11
10302	C57BL/6	M	BL6M	1X	B	10	NS2_NEP K88K	NS2_NEP K88K	0.0261178	7	G	A	Var	Syn	NS	88	738	NS2_NEP	264	K	K	NS_G738A	15478	4786	0	125
10649	BALB/C	F	BALBF	1XP	1XP	Test (R11)	NS2_NEP K88K	NS2_NEP K88K	0.0159787	7	G	A	Var	Syn	NS	88	738	NS2_NEP	264	K	K	NS_G738A	7929	2253	0	36
9516	BALB/C	M	BALBM	2X	AB	10	NS2_NEP A102T	NS2_NEP A102T	0.0107464	1	G	A	Var	Nonsyn	NS	102	778	NS2_NEP	304	A	T	NS_G778A	11287	5118	0	55
9536	BALB/C	M	BALBM	1X	D	10	NS2_NEP Q104Q	NS2_NEP Q104Q	0.0180383	2	G	A	Var	Syn	NS	104	786	NS2_NEP	312	Q	Q	NS_G786A	5593	887	0	16
10648	BALB/C	F	BALBF	4X	ABCD	Test (R11)	NS2_NEP Q104Q	NS2_NEP Q104Q	0.0151515	2	G	A	Var	Syn	NS	104	786	NS2_NEP	312	Q	Q	NS_G786A	5593	660	0	10
10317	C57BL/6	F	BL6F	1X	D	10	NS2_NEP L105I	NS2_NEP L105I	0.997592	3	C	A	Var	Nonsyn	NS	105	787	NS2_NEP	313	L	I	NS_C787A	10388	4153	2	4143
9500	BALB/C	M	BALBM	1X	C	10	NS2_NEP F107S	NS2_NEP F107S	0.142857	1	T	C	Var	Nonsyn	NS	107	794	NS2_NEP	320	F	S	NS_T794C	4837	21	0	3
8245	C57BL/6	M	BL6M	Stock	D	1	NS2_NEP T115T	NS2_NEP T115T	0.0135593	1	T	C	Var	Syn	NS	115	819	NS2_NEP	345	T	T	NS_T819C	3113	590	0	8
10009	C57BL/6	M	BL6M	4X	ABCD	10	PA E15E ; PA_X E15E	PA E15E ; PA_X E15E	0.16973	1	A	G	Var	Syn; Syn	PA	15; 15	46	PA; PA_X	45; 45	E; E	E; E	PA_A46G	1304	925	2	157
97730	BALB/C	F	BALBF	1X	B	10	PA L16I ; PA_X L16I	PA L16I ; PA_X L16I	0.0385321	4	C	A	Var	Nonsyn; Nonsyn	PA	16; 16	47	PA; PA_X	46; 46	L; L	I; I	PA_C47A	679	1090	0	42
97860	BALB/C	F	BALBF	2X	CD	10	PA L16I ; PA_X L16I	PA L16I ; PA_X L16I	0.0310378	4	C	A	Var	Nonsyn; Nonsyn	PA	16; 16	47	PA; PA_X	46; 46	L; L	I; I	PA_C47A	1314	2062	0	64
10637	BALB/C	F	BALBF	2X	AB	Test (R11)	PA K19K ; PA_X K19K	PA K19K ; PA_X K19K	0.185185	1	G	A	Var	Syn; Syn	PA	19; 19	58	PA; PA_X	57; 57	K; K	K; K	PA_G58A	688	54	0	10
97850	BALB/C	F	BALBF	4X	ABCD	10	PA M21I ; PA_X M21I	PA M21I ; PA_X M21I	0.115061	23	G	A	Var	Nonsyn; Nonsyn	PA	21; 21	64	PA; PA_X	63; 63	M; M	I; I	PA_G64A	1503	3094	2	356
97730	BALB/C	F	BALBF	1X	B	10	PA M21I ; PA_X M21I	PA M21I ; PA_X M21I	0.469801	23	G	A	Var	Nonsyn; Nonsyn	PA	21; 21	64	PA; PA_X	63; 63	M; M	I; I	PA_G64A	1503	2765	2	1299
97830	BALB/C	F	BALBF	1X	C	10	PA M21I ; PA_X M21I	PA M21I ; PA_X M21I	0.571133	23	G	A	Var	Nonsyn; Nonsyn	PA	21; 21	64	PA; PA_X	63; 63	M; M	I; I	PA_G64A	1503	2418	2	1381
9518	BALB/C	M	BALBM	1X	B	10	PA M21I ; PA_X M21I	PA M21I ; PA_X M21I	0.770335	23	G	A	Var	Nonsyn; Nonsyn	PA	21; 21	64	PA; PA_X	63; 63	M; M	I; I	PA_G64A	1503	209	2	161
9537	BALB/C	M	BALBM	2X	CD	10	PA M21I ; PA_X M21I	PA M21I ; PA_X M21I	0.135593	23	G	A	Var	Nonsyn; Nonsyn	PA	21; 21	64	PA; PA_X	63; 63	M; M	I; I	PA_G64A	741	59	2	8
10304	C57BL/6	M	BL6M	1X	C	10	PA M21I ; PA_X M21I	PA M21I ; PA_X M21I	0.993789	23	G	A	Var	Nonsyn; Nonsyn	PA	21; 21	64	PA; PA_X	63; 63	M; M	I; I	PA_G64A	1503	1610	2	1600
9517	BALB/C	M	BALBM	4X	ABCD	10	PA D27G ; PA_X D27G	PA D27G ; PA_X D27G	0.67418	6	A	G	Var	Nonsyn; Nonsyn	PA	27; 27	81	PA; PA_X	80; 80	D; D	G; G	PA_A81G	1788	1464	0	987
9517	BALB/C	M	BALBM	4X	ABCD	10	PA F35L ; PA_X F35L	PA F35L ; PA_X F35L	0.246921	1	T	C	Var	Nonsyn; Nonsyn	PA	35; 35	104	PA; PA_X	103; 103	F; F	L; L	PA_T104C	1955	1624	0	401
10305	C57BL/6	M	BL6M	2X	CD	10	PA I38V ; PA_X I38V	PA I38V ; PA_X I38V	0.0830999	1	A	G	Var	Nonsyn; Nonsyn	PA	38; 38	113	PA; PA_X	112; 112	I; I	V; V	PA_A113G	2087	1071	1	89
97690	BALB/C	F	BALBF	2X	AB	10	PA I38T ; PA_X I38T	PA I38T ; PA_X I38T	0.12815	3	T	C	Var	Nonsyn; Nonsyn	PA	38; 38	114	PA; PA_X	113; 113	I; I	T; T	PA_T114C	2096	3254	0	417
97830	BALB/C	F	BALBF	1X	C	10	PA I38M ; PA_X I38M	PA I38M ; PA_X I38M	0.142017	3	A	G	Var	Nonsyn; Nonsyn	PA	38; 38	115	PA; PA_X	114; 114	I; I	M; M	PA_A115G	2139	3401	1	483
97830	BALB/C	F	BALBF	1X	C	10	PA V44I ; PA_X V44I	PA V44I ; PA_X V44I	0.0394839	1	G	A	Var	Nonsyn; Nonsyn	PA	44; 44	131	PA; PA_X	130; 130	V; V	I; I	PA_G131A	2498	3875	0	153
9500	BALB/C	M	BALBM	1X	C	10	PA M47L ; PA_X M47L	PA M47L ; PA_X M47L	0.833333	3	A	T	Var	Nonsyn; Nonsyn	PA	47; 47	140	PA; PA_X	139; 139	M; M	L; L	PA_A140T	1285	12	0	10
10009	C57BL/6	M	BL6M	4X	ABCD	10	PA D50D ; PA_X D50D	PA D50D ; PA_X D50D	0.845118	2	T	C	Var	Syn; Syn	PA	50; 50	151	PA; PA_X	150; 150	D; D	D; D	PA_T151C	2662	1188	1	1004
10311	C57BL/6	F	BL6F	4X	ABCD	10	PA D50D ; PA_X D50D	PA D50D ; PA_X D50D	0.0191288	2	T	C	Var	Syn; Syn	PA	50; 50	151	PA; PA_X	150; 150	D; D	D; D	PA_T151C	2662	6221	1	119
9500	BALB/C	M	BALBM	1X	C	10	PA I54M ; PA_X I54M	PA I54M ; PA_X I54M	0.133333	1	C	G	Var	Nonsyn; Nonsyn	PA	54; 54	163	PA; PA_X	162; 162	I; I	M; M	PA_C163G	1355	45	0	6
9500	BALB/C	M	BALBM	1X	C	10	PA N55D ; PA_X N55D	PA N55D ; PA_X N55D	0.130435	1	A	G	Var	Nonsyn; Nonsyn	PA	55; 55	164	PA; PA_X	163; 163	N; N	D; D	PA_A164G	1368	46	0	6
9500	BALB/C	M	BALBM	1X	C	10	PA E56D ; PA_X E56D	PA E56D ; PA_X E56D	0.12766	1	G	T	Var	Nonsyn; Nonsyn	PA	56; 56	169	PA; PA_X	168; 168	E; E	D; D	PA_G169T	1394	47	0	6
9500	BALB/C	M	BALBM	1X	C	10	PA Q57R ; PA_X Q57R	PA Q57R ; PA_X Q57R	0.130435	1	A	G	Var	Nonsyn; Nonsyn	PA	57; 57	171	PA; PA_X	170; 170	Q; Q	R; R	PA_A171G	1397	46	1	6
9500	BALB/C	M	BALBM	1X	C	10	PA G58S ; PA_X G58S	PA G58S ; PA_X G58S	0.142857	1	G	A	Var	Nonsyn; Nonsyn	PA	58; 58	173	PA; PA_X	172; 172	G; G	S; S	PA_G173A	1392	28	0	4
9500	BALB/C	M	BALBM	1X	C	10	PA G58A ; PA_X G58A	PA G58A ; PA_X G58A	0.2	1	G	C	Var	Nonsyn; Nonsyn	PA	58; 58	174	PA; PA_X	173; 173	G; G	A; A	PA_G174C	1371	30	0	6
9500	BALB/C	M	BALBM	1X	C	10	PA S60A ; PA_X S60A	PA S60A ; PA_X S60A	0.2	1	T	G	Var	Nonsyn; Nonsyn	PA	60; 60	179	PA; PA_X	178; 178	S; S	A; A	PA_T179G	1407	30	0	6
9500	BALB/C	M	BALBM	1X	C	10	PA S60S ; PA_X S60S	PA S60S ; PA_X S60S	0.2	1	A	T	Var	Syn; Syn	PA	60; 60	181	PA; PA_X	180; 180	S; S	S; S	PA_A181T	1463	30	0	6
9500	BALB/C	M	BALBM	1X	C	10	PA I61T ; PA_X I61T	PA I61T ; PA_X I61T	0.2	1	T	C	Var	Nonsyn; Nonsyn	PA	61; 61	183	PA; PA_X	182; 182	I; I	T; T	PA_T183C	1498	30	0	6
10300	C57BL/6	M	BL6M	2X	AB	10	PA H74N ; PA_X H74N	PA H74N ; PA_X H74N	0.0197869	1	C	A	Var	Nonsyn; Nonsyn	PA	74; 74	221	PA; PA_X	220; 220	H; H	N; N	PA_C221A	3123	3285	0	65
97680	BALB/C	F	BALBF	1X	A	10	PA I79V ; PA_X I79V	PA I79V ; PA_X I79V	0.0134214	2	A	G	Var	Nonsyn; Nonsyn	PA	79; 79	236	PA; PA_X	235; 235	I; I	V; V	PA_A236G	2956	4694	0	63
9515	BALB/C	M	BALBM	1X	A	10	PA R82R ; PA_X R82R	PA R82R ; PA_X R82R	1	1	A	G	Var	Syn; Syn	PA	82; 82	247	PA; PA_X	246; 246	R; R	R; R	PA_A247G	2944	1113	4	1113
97850	BALB/C	F	BALBF	4X	ABCD	10	PA V90I ; PA_X V90I	PA V90I ; PA_X V90I	0.0248828	5	G	A	Var	Nonsyn; Nonsyn	PA	90; 90	269	PA; PA_X	268; 268	V; V	I; I	PA_G269A	3310	5546	0	138
10300	C57BL/6	M	BL6M	2X	AB	10	PA V90I ; PA_X V90I	PA V90I ; PA_X V90I	0.41012	5	G	A	Var	Nonsyn; Nonsyn	PA	90; 90	269	PA; PA_X	268; 268	V; V	I; I	PA_G269A	3310	2826	0	1159
97680	BALB/C	F	BALBF	1X	A	10	PA N92T ; PA_X N92T	PA N92T ; PA_X N92T	0.0316086	1	A	C	Var	Nonsyn; Nonsyn	PA	92; 92	276	PA; PA_X	275; 275	N; N	T; T	PA_A276C	3223	4967	0	157
10009	C57BL/6	M	BL6M	4X	ABCD	10	PA N92K ; PA_X N92K	PA N92K ; PA_X N92K	0.114379	2	C	G	Var	Nonsyn; Nonsyn	PA	92; 92	277	PA; PA_X	276; 276	N; N	K; K	PA_C277G	3257	918	0	105
10009	C57BL/6	M	BL6M	4X	ABCD	10	PA I94F ; PA_X I94F	PA I94F ; PA_X I94F	0.107832	1	A	T	Var	Nonsyn; Nonsyn	PA	94; 94	281	PA; PA_X	280; 280	I; I	F; F	PA_A281T	3232	881	1	95
97690	BALB/C	F	BALBF	2X	AB	10	PA T97I ; PA_X T97I	PA T97I ; PA_X T97I	0.0391341	13	C	T	Var	Nonsyn; Nonsyn	PA	97; 97	291	PA; PA_X	290; 290	T; T	I; I	PA_C291T	3354	4804	0	188
97850	BALB/C	F	BALBF	4X	ABCD	10	PA T97I ; PA_X T97I	PA T97I ; PA_X T97I	0.0683535	13	C	T	Var	Nonsyn; Nonsyn	PA	97; 97	291	PA; PA_X	290; 290	T; T	I; I	PA_C291T	3354	5296	0	362
97730	BALB/C	F	BALBF	1X	B	10	PA T97I ; PA_X T97I	PA T97I ; PA_X T97I	0.469653	13	C	T	Var	Nonsyn; Nonsyn	PA	97; 97	291	PA; PA_X	290; 290	T; T	I; I	PA_C291T	3354	5470	0	2569
97760	BALB/C	F	BALBF	1X	D	10	PA T97I ; PA_X T97I	PA T97I ; PA_X T97I	0.999211	13	C	T	Var	Nonsyn; Nonsyn	PA	97; 97	291	PA; PA_X	290; 290	T; T	I; I	PA_C291T	3354	3804	0	3801
9516	BALB/C	M	BALBM	2X	AB	10	PA T97I ; PA_X T97I	PA T97I ; PA_X T97I	0.966667	13	C	T	Var	Nonsyn; Nonsyn	PA	97; 97	291	PA; PA_X	290; 290	T; T	I; I	PA_C291T	3354	240	0	232
10009	C57BL/6	M	BL6M	4X	ABCD	10	PA T97I ; PA_X T97I	PA T97I ; PA_X T97I	0.750968	13	C	T	Var	Nonsyn; Nonsyn	PA	97; 97	291	PA; PA_X	290; 290	T; T	I; I	PA_C291T	3354	775	0	582
10311	C57BL/6	F	BL6F	4X	ABCD	10	PA G99G ; PA_X G99G	PA G99G ; PA_X G99G	0.0310881	1	A	G	Var	Syn; Syn	PA	99; 99	298	PA; PA_X	297; 297	G; G	G; G	PA_A298G	1698	386	0	12
9750	BALB/C	F	BALBF	4X	ABCD	7	PA P103P ; PA_X P103P	PA P103P ; PA_X P103P	0.0757576	2	G	A	Var	Syn; Syn	PA	103; 103	310	PA; PA_X	309; 309	P; P	P; P	PA_G310A	1689	66	1	5
10313	C57BL/6	F	BL6F	2X	AB	10	PA P103P ; PA_X P103P	PA P103P ; PA_X P103P	0.0261097	2	G	A	Var	Syn; Syn	PA	103; 103	310	PA; PA_X	309; 309	P; P	P; P	PA_G310A	1689	383	1	10
10304	C57BL/6	M	BL6M	1X	C	10	PA D111D ; PA_X D111D	PA D111D ; PA_X D111D	0.0323786	1	T	C	Var	Syn; Syn	PA	111; 111	334	PA; PA_X	333; 333	D; D	D; D	PA_T334C	1666	803	0	26
10317	C57BL/6	F	BL6F	1X	D	10	PA Y112F ; PA_X Y112F	PA Y112F ; PA_X Y112F	0.947368	1	A	T	Var	Nonsyn; Nonsyn	PA	112; 112	336	PA; PA_X	335; 335	Y; Y	F; F	PA_A336T	3453	380	0	360
8244	C57BL/6	M	BL6M	Stock	B	1	PA F117F ; PA_X F117F	PA F117F ; PA_X F117F	0.0821918	1	C	T	Var	Syn; Syn	PA	117; 117	352	PA; PA_X	351; 351	F; F	F; F	PA_C352T	1685	146	0	12
9045	C57BL/6	F	BL6F	4X	ABCD	4	PA R124R ; PA_X R124R	PA R124R ; PA_X R124R	0.141638	5	G	A	Var	Syn; Syn	PA	124; 124	373	PA; PA_X	372; 372	R; R	R; R	PA_G373A	3478	586	0	83
9738	C57BL/6	F	BL6F	4X	ABCD	7	PA R124R ; PA_X R124R	PA R124R ; PA_X R124R	0.1	5	G	A	Var	Syn; Syn	PA	124; 124	373	PA; PA_X	372; 372	R; R	R; R	PA_G373A	1698	80	0	8
10311	C57BL/6	F	BL6F	4X	ABCD	10	PA R124R ; PA_X R124R	PA R124R ; PA_X R124R	0.0562249	5	G	A	Var	Syn; Syn	PA	124; 124	373	PA; PA_X	372; 372	R; R	R; R	PA_G373A	3478	498	0	28
97760	BALB/C	F	BALBF	1X	D	10	PA R125K ; PA_X R125K	PA R125K ; PA_X R125K	0.0721336	1	G	A	Var	Nonsyn; Nonsyn	PA	125; 125	375	PA; PA_X	374; 374	R; R	K; K	PA_G375A	3417	3951	3	285
10302	C57BL/6	M	BL6M	1X	B	10	PA I129K ; PA_X I129K	PA I129K ; PA_X I129K	0.0340909	1	T	A	Var	Nonsyn; Nonsyn	PA	129; 129	387	PA; PA_X	386; 386	I; I	K; K	PA_T387A	1863	176	0	6
97760	BALB/C	F	BALBF	1X	D	10	PA E133D ; PA_X E133D	PA E133D ; PA_X E133D	0.0261882	1	A	C	Var	Nonsyn; Nonsyn	PA	133; 133	400	PA; PA_X	399; 399	E; E	D; D	PA_A400C	3642	4124	0	108
10300	C57BL/6	M	BL6M	2X	AB	10	PA N142D ; PA_X N142D	PA N142D ; PA_X N142D	0.636456	1	A	G	Var	Nonsyn; Nonsyn	PA	142; 142	425	PA; PA_X	424; 424	N; N	D; D	PA_A425G	3629	982	0	625
0	STOCK	STOCK	STOCK	STOCK	STOCK	STOCK	PA N142T ; PA_X N142T	PA N142T ; PA_X N142T	0.0342969	17	A	C	Var	Nonsyn; Nonsyn	PA	142; 142	426	PA; PA_X	425; 425	N; N	T; T	PA_A426C	3637	4082	1	140
97730	BALB/C	F	BALBF	1X	B	10	PA N142T ; PA_X N142T	PA N142T ; PA_X N142T	0.0176252	17	A	C	Var	Nonsyn; Nonsyn	PA	142; 142	426	PA; PA_X	425; 425	N; N	T; T	PA_A426C	3637	5390	1	95
97860	BALB/C	F	BALBF	2X	CD	10	PA N142T ; PA_X N142T	PA N142T ; PA_X N142T	0.327869	17	A	C	Var	Nonsyn; Nonsyn	PA	142; 142	426	PA; PA_X	425; 425	N; N	T; T	PA_A426C	3637	4880	1	1600
9518	BALB/C	M	BALBM	1X	B	10	PA N142S ; PA_X N142S	PA N142S ; PA_X N142S	0.208333	1	A	G	Var	Nonsyn; Nonsyn	PA	142; 142	426	PA; PA_X	425; 425	N; N	S; S	PA_A426G	1873	24	0	5
9536	BALB/C	M	BALBM	1X	D	10	PA N142T ; PA_X N142T	PA N142T ; PA_X N142T	0.314286	17	A	C	Var	Nonsyn; Nonsyn	PA	142; 142	426	PA; PA_X	425; 425	N; N	T; T	PA_A426C	1764	35	1	11
10311	C57BL/6	F	BL6F	4X	ABCD	10	PA N142T ; PA_X N142T	PA N142T ; PA_X N142T	0.0344828	17	A	C	Var	Nonsyn; Nonsyn	PA	142; 142	426	PA; PA_X	425; 425	N; N	T; T	PA_A426C	1873	203	0	7
10313	C57BL/6	F	BL6F	2X	AB	10	PA I145V ; PA_X I145V	PA I145V ; PA_X I145V	0.06	1	A	G	Var	Nonsyn; Nonsyn	PA	145; 145	434	PA; PA_X	433; 433	I; I	V; V	PA_A434G	1807	100	0	6
9296	C57BL/6	F	BL6F	1X	B	4	PA A156A ; PA_X A156A	PA A156A ; PA_X A156A	0.0917647	1	C	A	Var	Syn; Syn	PA	156; 156	469	PA; PA_X	468; 468	A; A	A; A	PA_C469A	3434	425	0	39
10009	C57BL/6	M	BL6M	4X	ABCD	10	PA S167S ; PA_X S167S	PA S167S ; PA_X S167S	0.119701	1	C	T	Var	Syn; Syn	PA	167; 167	502	PA; PA_X	501; 501	S; S	S; S	PA_C502T	3540	401	0	48
10311	C57BL/6	F	BL6F	4X	ABCD	10	PA R168R ; PA_X R168R	PA R168R ; PA_X R168R	0.190024	2	G	A	Var	Syn; Syn	PA	168; 168	505	PA; PA_X	504; 504	R; R	R; R	PA_G505A	3622	421	0	80
97690	BALB/C	F	BALBF	2X	AB	10	PA R170R ; PA_X R170R	PA R170R ; PA_X R170R	0.115939	2	G	A	Var	Syn; Syn	PA	170; 170	511	PA; PA_X	510; 510	R; R	R; R	PA_G511A	3547	4580	0	531
97850	BALB/C	F	BALBF	4X	ABCD	10	PA L175L ; PA_X L175L	PA L175L ; PA_X L175L	0.0140266	2	A	G	Var	Syn; Syn	PA	175; 175	526	PA; PA_X	525; 525	L; L	L; L	PA_A526G	3417	4135	0	58
10312	C57BL/6	F	BL6F	1X	B	10	PA D189E ; PA_X D189E	PA D189E ; PA_X D189E	0.998325	3	T	G	Var	Nonsyn; Nonsyn	PA	189; 189	568	PA; PA_X	567; 567	D; D	E; E	PA_T568G	3324	597	0	596
97690	BALB/C	F	BALBF	2X	AB	10	PA S190F ; PA_X S190F	PA S190F ; PA_X S190F	0.818725	4	C	T	Var	Nonsyn; Nonsyn	PA	190; 190	570	PA; PA_X	569; 569	S; S	F; F	PA_C570T	3427	4187	0	3428
9536	BALB/C	M	BALBM	1X	D	10	PA S190F ; PA_X S190F	PA S190F ; PA_X S190F	0.722222	4	C	T	Var	Nonsyn; Nonsyn	PA	190; 190	570	PA; PA_X	569; 569	S; S	F; F	PA_C570T	1746	18	0	13
9767	BALB/C	F	BALBF	1X	C	7	PA F191F ; PA_X F191F	PA F191F ; PA_X F191F	0.0588235	2	T	C	Var	Syn; Syn	PA	191; 191	574	PA; PA_X	573; 573	F; F	F; F	PA_T574C	1557	85	0	5
97830	BALB/C	F	BALBF	1X	C	10	PA F191F ; PA_X F191F	PA F191F ; PA_X F191F	0.0126636	2	T	C	Var	Syn; Syn	PA	191; 191	574	PA; PA_X	573; 573	F; F	F; F	PA_T574C	1674	2369	0	30
97830	BALB/C	F	BALBF	1X	C	10	PA R192S	PA R192S	0.451675	4	C	A	Var	Nonsyn	PA	192	575	PA	574	R	S	PA_C575A	3323	4180	0	1888
97730	BALB/C	F	BALBF	1X	B	10	PA R192R ; PA_X V192A	PA R192R ; PA_X V192A	0.0146199	1	T	C	Var	Syn; Nonsyn	PA	192; 192	577	PA; PA_X	576; 575	R; V	R; A	PA_T577C	1641	2394	0	35
10300	C57BL/6	M	BL6M	2X	AB	10	PA G209G ; PA_X G209E	PA G209G ; PA_X G209E	0.0357995	1	G	A	Var	Syn; Nonsyn	PA	209; 209	628	PA; PA_X	627; 626	G; G	G; E	PA_G628A	1549	419	0	15
97680	BALB/C	F	BALBF	1X	A	10	PA P220P ; PA_X R220H	PA P220P ; PA_X R220H	0.0131356	2	G	A	Var	Syn; Nonsyn	PA	220; 220	661	PA; PA_X	660; 659	P; R	P; H	PA_G661A	3312	4720	0	62
9517	BALB/C	M	BALBM	4X	ABCD	10	PA P220P ; PA_X R220H	PA P220P ; PA_X R220H	0.0348929	2	G	A	Var	Syn; Nonsyn	PA	220; 220	661	PA; PA_X	660; 659	P; R	P; H	PA_G661A	3312	1261	0	44
97860	BALB/C	F	BALBF	2X	CD	10	PA P221L ; PA_X R221*	PA P221L ; PA_X R221*	0.0156906	1	C	T	Var	Nonsyn; Stop	PA	221; 221	663	PA; PA_X	662; 661	P; R	L; *	PA_C663T	3415	4525	0	71
97690	BALB/C	F	BALBF	2X	AB	10	PA N228S ; PA_X I228V	PA N228S ; PA_X I228V	0.0117264	1	A	G	Var	Nonsyn; Nonsyn	PA	228; 228	684	PA; PA_X	683; 682	N; I	S; V	PA_A684G	3551	4605	1	54
97850	BALB/C	F	BALBF	4X	ABCD	10	PA G235R ; PA_X M234I	PA G235R ; PA_X M234I	0.0136133	1	G	A	Var	Nonsyn; Nonsyn	PA	235; 234	704	PA; PA_X	703; 702	G; M	R; I	PA_G704A	3579	4334	0	59
9518	BALB/C	M	BALBM	1X	B	10	PA V253V ; PA_X *253*	PA V253V ; PA_X *253*	0.0619469	1	G	A	Var	Syn; Syn	PA	253; 253	760	PA; PA_X	759; 758	V; *	V; *	PA_G760A	1643	113	0	7
10302	C57BL/6	M	BL6M	1X	B	10	PA A255T	PA A255T	0.105263	1	G	A	Var	Nonsyn	PA	255	764	PA	763	A	T	PA_G764A	1795	190	3	20
9767	BALB/C	F	BALBF	1X	C	7	PA C276C	PA C276C	0.16	1	T	C	Var	Syn	PA	276	829	PA	828	C	C	PA_T829C	1694	25	1	4
97690	BALB/C	F	BALBF	2X	AB	10	PA E300E	PA E300E	0.0131974	1	G	A	Var	Syn	PA	300	901	PA	900	E	E	PA_G901A	1552	1667	0	22
10299	C57BL/6	M	BL6M	1X	A	10	PA Y305C	PA Y305C	0.953659	1	A	G	Var	Nonsyn	PA	305	915	PA	914	Y	C	PA_A915G	3616	410	0	391
9536	BALB/C	M	BALBM	1X	D	10	PA A307A	PA A307A	0.210526	1	G	T	Var	Syn	PA	307	922	PA	921	A	A	PA_G922T	1581	19	0	4
9515	BALB/C	M	BALBM	1X	A	10	PA T313K	PA T313K	0.876543	1	C	A	Var	Nonsyn	PA	313	939	PA	938	T	K	PA_C939A	3319	81	0	71
9518	BALB/C	M	BALBM	1X	B	10	PA H326Y	PA H326Y	0.0784314	1	C	T	Var	Nonsyn	PA	326	977	PA	976	H	Y	PA_C977T	1583	102	0	8
97860	BALB/C	F	BALBF	2X	CD	10	PA I330V	PA I330V	0.311233	5	A	G	Var	Nonsyn	PA	330	989	PA	988	I	V	PA_A989G	3233	4389	2	1366
10624	BALB/C	F	BALBF	2X	CD	Test (R11)	PA L336L	PA L336L	0.111111	3	G	A	Var	Syn	PA	336	1009	PA	1008	L	L	PA_G1009A	1652	45	0	5
97860	BALB/C	F	BALBF	2X	CD	10	PA L336L	PA L336L	0.0204672	3	G	A	Var	Syn	PA	336	1009	PA	1008	L	L	PA_G1009A	3353	4495	0	92
97850	BALB/C	F	BALBF	4X	ABCD	10	PA E344D	PA E344D	0.0510325	5	A	C	Var	Nonsyn	PA	344	1033	PA	1032	E	D	PA_A1033C	3492	4213	0	215
97830	BALB/C	F	BALBF	1X	C	10	PA D347N	PA D347N	0.0303366	1	G	A	Var	Nonsyn	PA	347	1040	PA	1039	D	N	PA_G1040A	3467	4516	0	137
10311	C57BL/6	F	BL6F	4X	ABCD	10	PA D347G	PA D347G	0.0245902	2	A	G	Var	Nonsyn	PA	347	1041	PA	1040	D	G	PA_A1041G	1785	366	0	9
10311	C57BL/6	F	BL6F	4X	ABCD	10	PA I348I	PA I348I	0.0229111	1	T	C	Var	Syn	PA	348	1045	PA	1044	I	I	PA_T1045C	3492	742	0	17
0	STOCK	STOCK	STOCK	STOCK	STOCK	STOCK	PA E351E	PA E351E	0.017589	4	G	A	Var	Syn	PA	351	1054	PA	1053	E	E	PA_G1054A	1760	2331	0	41
8235	C57BL/6	M	BL6M	Stock	C	1	PA E351E	PA E351E	0.041958	4	G	A	Var	Syn	PA	351	1054	PA	1053	E	E	PA_G1054A	1760	143	0	6
9297	C57BL/6	F	BL6F	2X	AB	4	PA E351E	PA E351E	0.0496183	4	G	A	Var	Syn	PA	351	1054	PA	1053	E	E	PA_G1054A	3444	786	3	39
9739	C57BL/6	F	BL6F	2X	AB	7	PA E351E	PA E351E	0.0403226	4	G	A	Var	Syn	PA	351	1054	PA	1053	E	E	PA_G1054A	1684	248	3	10
10311	C57BL/6	F	BL6F	4X	ABCD	10	PA K353K	PA K353K	0.0360825	2	A	G	Var	Syn	PA	353	1060	PA	1059	K	K	PA_A1060G	3455	776	0	28
97830	BALB/C	F	BALBF	1X	C	10	PA K361K	PA K361K	0.0183566	1	G	A	Var	Syn	PA	361	1084	PA	1083	K	K	PA_G1084A	3477	4576	0	84
10637	BALB/C	F	BALBF	2X	AB	Test (R11)	PA T363T	PA T363T	1	3	G	A	Var	Syn	PA	363	1090	PA	1089	T	T	PA_G1090A	1730	9	4	9
10300	C57BL/6	M	BL6M	2X	AB	10	PA T363T	PA T363T	0.273026	3	G	A	Var	Syn	PA	363	1090	PA	1089	T	T	PA_G1090A	3318	912	4	249
10311	C57BL/6	F	BL6F	4X	ABCD	10	PA T363T	PA T363T	0.0529634	3	G	A	Var	Syn	PA	363	1090	PA	1089	T	T	PA_G1090A	3318	793	4	42
10649	BALB/C	F	BALBF	1XP	1XP	Test (R11)	PA N373N	PA N373N	0.142857	1	C	T	Var	Syn	PA	373	1120	PA	1119	N	N	PA_C1120T	1917	35	0	5
97690	BALB/C	F	BALBF	2X	AB	10	PA K378K	PA K378K	0.0109852	1	G	A	Var	Syn	PA	378	1135	PA	1134	K	K	PA_G1135A	1940	2913	0	32
10311	C57BL/6	F	BL6F	4X	ABCD	10	PA S388N	PA S388N	0.144737	2	G	A	Var	Nonsyn	PA	388	1164	PA	1163	S	N	PA_G1164A	3639	988	1	143
9516	BALB/C	M	BALBM	2X	AB	10	PA L390L	PA L390L	0.0296296	1	G	A	Var	Syn	PA	390	1171	PA	1170	L	L	PA_G1171A	1952	270	0	8
9517	BALB/C	M	BALBM	4X	ABCD	10	PA E397E	PA E397E	0.111339	1	A	G	Var	Syn	PA	397	1192	PA	1191	E	E	PA_A1192G	3670	2443	0	272
10299	C57BL/6	M	BL6M	1X	A	10	PA S402S	PA S402S	0.0401786	1	A	C	Var	Syn	PA	402	1207	PA	1206	S	S	PA_A1207C	1712	224	0	9
10309	C57BL/6	F	BL6F	1X	A	10	PA S405S	PA S405S	0.0232198	1	C	T	Var	Syn	PA	405	1216	PA	1215	S	S	PA_C1216T	1925	646	0	15
10299	C57BL/6	M	BL6M	1X	A	10	PA S405R	PA S405R	0.0334728	1	C	A	Var	Nonsyn	PA	405	1216	PA	1215	S	R	PA_C1216A	1790	239	0	8
9516	BALB/C	M	BALBM	2X	AB	10	PA L417L	PA L417L	0.0460829	1	G	A	Var	Syn	PA	417	1252	PA	1251	L	L	PA_G1252A	1818	217	0	10
8245	C57BL/6	M	BL6M	Stock	D	1	PA L425L	PA L425L	0.0479452	3	C	T	Var	Syn	PA	425	1276	PA	1275	L	L	PA_C1276T	1784	146	0	7
9740	C57BL/6	F	BL6F	1X	A	7	PA L425L	PA L425L	0.214286	3	C	T	Var	Syn	PA	425	1276	PA	1275	L	L	PA_C1276T	1784	42	0	9
10309	C57BL/6	F	BL6F	1X	A	10	PA L425L	PA L425L	0.156578	3	C	T	Var	Syn	PA	425	1276	PA	1275	L	L	PA_C1276T	3692	1239	0	194
97730	BALB/C	F	BALBF	1X	B	10	PA D431D	PA D431D	0.0164329	1	C	T	Var	Syn	PA	431	1294	PA	1293	D	D	PA_C1294T	1885	2495	1	41
9943	C57BL/6	F	BL6F	2X	CD	7	PA I438I	PA I438I	0.0581395	1	T	C	Var	Syn	PA	438	1315	PA	1314	I	I	PA_T1315C	1813	172	0	10
10009	C57BL/6	M	BL6M	4X	ABCD	10	PA R443R	PA R443R	0.566452	1	G	A	Var	Syn	PA	443	1330	PA	1329	R	R	PA_G1330A	3690	775	1	439
9516	BALB/C	M	BALBM	2X	AB	10	PA H452H	PA H452H	0.0382775	1	T	C	Var	Syn	PA	452	1357	PA	1356	H	H	PA_T1357C	1818	209	2	8
97680	BALB/C	F	BALBF	1X	A	10	PA M460V	PA M460V	0.0406139	4	A	G	Var	Nonsyn	PA	460	1379	PA	1378	M	V	PA_A1379G	3693	5343	0	217
10299	C57BL/6	M	BL6M	1X	A	10	PA T467N	PA T467N	0.0488889	1	C	A	Var	Nonsyn	PA	467	1401	PA	1400	T	N	PA_C1401A	1971	225	0	11
8325	C57BL/6	F	BL6F	Stock	C	1	PA L469L	PA L469L	0.1	1	T	C	Var	Syn	PA	469	1406	PA	1405	L	L	PA_T1406C	1901	60	0	6
8325	C57BL/6	F	BL6F	Stock	C	1	PA L482L	PA L482L	0.0927835	1	A	G	Var	Syn	PA	482	1447	PA	1446	L	L	PA_A1447G	2103	97	0	9
9287	C57BL/6	F	BL6F	2X	CD	4	PA I483I	PA I483I	0.0433944	1	T	C	Var	Syn	PA	483	1450	PA	1449	I	I	PA_T1450C	4066	1037	3	45
10299	C57BL/6	M	BL6M	1X	A	10	PA I486M	PA I486M	0.0313901	1	A	G	Var	Nonsyn	PA	486	1459	PA	1458	I	M	PA_A1459G	2139	223	0	7
9517	BALB/C	M	BALBM	4X	ABCD	10	PA T491T	PA T491T	0.278225	1	T	C	Var	Syn	PA	491	1474	PA	1473	T	T	PA_T1474C	4267	3109	0	865
97860	BALB/C	F	BALBF	2X	CD	10	PA K492T	PA K492T	0.0116798	2	A	C	Var	Nonsyn	PA	492	1476	PA	1475	K	T	PA_A1476C	4293	5822	0	68
97760	BALB/C	F	BALBF	1X	D	10	PA K492K	PA K492K	0.0146781	1	A	G	Var	Syn	PA	492	1477	PA	1476	K	K	PA_A1477G	4243	4769	0	70
10724	C57BL/6	F	BALBF	1XP	1XP	Test (R11)	PA G494G	PA G494G	0.018018	3	A	G	Var	Syn	PA	494	1483	PA	1482	G	G	PA_A1483G	2007	777	1	14
10732	C57BL/6	F	BALBF	1XP	1XP	Test (R11)	PA G494G	PA G494G	0.0199336	3	A	G	Var	Syn	PA	494	1483	PA	1482	G	G	PA_A1483G	2007	602	1	12
97680	BALB/C	F	BALBF	1X	A	10	PA G494G	PA G494G	0.0242611	3	A	G	Var	Syn	PA	494	1483	PA	1482	G	G	PA_A1483G	4059	5853	4	142
9515	BALB/C	M	BALBM	1X	A	10	PA R496R	PA R496R	0.0561798	1	A	G	Var	Syn	PA	496	1489	PA	1488	R	R	PA_A1489G	2061	89	0	5
8235	C57BL/6	M	BL6M	Stock	C	1	PA K497K	PA K497K	0.0365169	1	G	A	Var	Syn	PA	497	1492	PA	1491	K	K	PA_G1492A	2049	356	0	13
9293	C57BL/6	F	BL6F	1X	A	4	PA K506K	PA K506K	0.0358306	1	A	G	Var	Syn	PA	506	1519	PA	1518	K	K	PA_A1519G	2137	307	0	11
97680	BALB/C	F	BALBF	1X	A	10	PA D516D	PA D516D	0.0110605	1	C	T	Var	Syn	PA	516	1549	PA	1548	D	D	PA_C1549T	4257	6148	0	68
10649	BALB/C	F	BALBF	1XP	1XP	Test (R11)	PA V521V	PA V521V	0.108108	1	G	A	Var	Syn	PA	521	1564	PA	1563	V	V	PA_G1564A	2129	37	0	4
10309	C57BL/6	F	BL6F	1X	A	10	PA M523L	PA M523L	0.0341322	1	A	T	Var	Nonsyn	PA	523	1568	PA	1567	M	L	PA_A1568T	4284	1377	0	47
9738	C57BL/6	F	BL6F	4X	ABCD	7	PA E524E	PA E524E	0.0298507	2	G	A	Var	Syn	PA	524	1573	PA	1572	E	E	PA_G1573A	2175	268	0	8
9738	C57BL/6	F	BL6F	4X	ABCD	7	PA F525F	PA F525F	0.0763359	1	T	C	Var	Syn	PA	525	1576	PA	1575	F	F	PA_T1576C	2203	131	0	10
10302	C57BL/6	M	BL6M	1X	B	10	PA S526S	PA S526S	0.0316901	1	T	C	Var	Syn	PA	526	1579	PA	1578	S	S	PA_T1579C	2201	284	0	9
10305	C57BL/6	M	BL6M	2X	CD	10	PA R531K	PA R531K	0.0521739	1	G	A	Var	Nonsyn	PA	531	1593	PA	1592	R	K	PA_G1593A	2051	230	0	12
9536	BALB/C	M	BALBM	1X	D	10	PA E533E	PA E533E	0.205128	1	G	A	Var	Syn	PA	533	1600	PA	1599	E	E	PA_G1600A	2051	39	0	8
10313	C57BL/6	F	BL6F	2X	AB	10	PA E533D	PA E533D	0.997429	3	G	T	Var	Nonsyn	PA	533	1600	PA	1599	E	D	PA_G1600T	4146	778	1	776
10624	BALB/C	F	BALBF	2X	CD	Test (R11)	PA E544E	PA E544E	0.122807	1	G	A	Var	Syn	PA	544	1633	PA	1632	E	E	PA_G1633A	2129	171	0	21
10313	C57BL/6	F	BL6F	2X	AB	10	PA R551R	PA R551R	0.142857	1	A	G	Var	Syn	PA	551	1654	PA	1653	R	R	PA_A1654G	4100	812	0	116
9515	BALB/C	M	BALBM	1X	A	10	PA S552N	PA S552N	0.981818	2	G	A	Var	Nonsyn	PA	552	1656	PA	1655	S	N	PA_G1656A	4106	110	0	108
9516	BALB/C	M	BALBM	2X	AB	10	PA S552N	PA S552N	0.0414594	2	G	A	Var	Nonsyn	PA	552	1656	PA	1655	S	N	PA_G1656A	4106	603	0	25
10311	C57BL/6	F	BL6F	4X	ABCD	10	PA Q556K	PA Q556K	0.0748349	4	C	A	Var	Nonsyn	PA	556	1667	PA	1666	Q	K	PA_C1667A	4021	1363	0	102
9517	BALB/C	M	BALBM	4X	ABCD	10	PA Q556R	PA Q556R	0.015444	1	A	G	Var	Nonsyn	PA	556	1668	PA	1667	Q	R	PA_A1668G	1911	1295	0	20
10307	C57BL/6	M	BL6M	1X	D	10	PA Q556Q	PA Q556Q	0.0208333	1	G	A	Var	Syn	PA	556	1669	PA	1668	Q	Q	PA_G1669A	2040	528	1	11
97680	BALB/C	F	BALBF	1X	A	10	PA M557V	PA M557V	0.0192672	2	A	G	Var	Nonsyn	PA	557	1670	PA	1669	M	V	PA_A1670G	3969	5813	0	112
10311	C57BL/6	F	BL6F	4X	ABCD	10	PA M557R	PA M557R	0.0454545	2	T	G	Var	Nonsyn	PA	557	1671	PA	1670	M	R	PA_T1671G	4000	1342	0	61
9516	BALB/C	M	BALBM	2X	AB	10	PA R559R	PA R559R	0.0376569	1	G	A	Var	Syn	PA	559	1678	PA	1677	R	R	PA_G1678A	1952	239	1	9
8327	C57BL/6	F	BL6F	Stock	A	1	PA P560P	PA P560P	0.0348101	1	T	C	Var	Syn	PA	560	1681	PA	1680	P	P	PA_T1681C	2065	316	2	11
10311	C57BL/6	F	BL6F	4X	ABCD	10	PA M561I	PA M561I	0.0286086	2	G	A	Var	Nonsyn	PA	561	1684	PA	1683	M	I	PA_G1684A	2117	769	0	22
10300	C57BL/6	M	BL6M	2X	AB	10	PA G569G	PA G569G	0.075804	1	A	T	Var	Syn	PA	569	1708	PA	1707	G	G	PA_A1708T	4453	1306	0	99
10624	BALB/C	F	BALBF	2X	CD	Test (R11)	PA T570T	PA T570T	0.0319149	1	A	G	Var	Syn	PA	570	1711	PA	1710	T	T	PA_A1711G	2155	188	0	6
10649	BALB/C	F	BALBF	1XP	1XP	Test (R11)	PA K572K	PA K572K	0.0603448	1	G	A	Var	Syn	PA	572	1717	PA	1716	K	K	PA_G1717A	2221	116	0	7
97730	BALB/C	F	BALBF	1X	B	10	PA I573V	PA I573V	0.0352508	3	A	G	Var	Nonsyn	PA	573	1718	PA	1717	I	V	PA_A1718G	4348	6241	0	220
10313	C57BL/6	F	BL6F	2X	AB	10	PA I573N	PA I573N	0.0227273	3	T	A	Var	Nonsyn	PA	573	1719	PA	1718	I	N	PA_T1719A	2113	528	0	12
8547	BALB/C	M	BALBM	Stock	B	1	PA K576K	PA K576K	0.0458716	1	A	G	Var	Syn	PA	576	1729	PA	1728	K	K	PA_A1729G	2109	109	0	5
9516	BALB/C	M	BALBM	2X	AB	10	PA G578R	PA G578R	0.0233161	1	G	A	Var	Nonsyn	PA	578	1733	PA	1732	G	R	PA_G1733A	2250	386	1	9
10624	BALB/C	F	BALBF	2X	CD	Test (R11)	PA Q590Q	PA Q590Q	0.03125	1	A	G	Var	Syn	PA	590	1771	PA	1770	Q	Q	PA_A1771G	2233	192	0	6
9750	BALB/C	F	BALBF	4X	ABCD	7	PA I592I	PA I592I	0.022409	1	C	T	Var	Syn	PA	592	1777	PA	1776	I	I	PA_C1777T	2192	357	0	8
9517	BALB/C	M	BALBM	4X	ABCD	10	PA V602I	PA V602I	0.0369702	1	G	A	Var	Nonsyn	PA	602	1805	PA	1804	V	I	PA_G1805A	4511	3327	0	123
10649	BALB/C	F	BALBF	1XP	1XP	Test (R11)	PA K603K	PA K603K	0.0746269	1	A	G	Var	Syn	PA	603	1810	PA	1809	K	K	PA_A1810G	2293	134	0	10
9750	BALB/C	F	BALBF	4X	ABCD	7	PA T608T	PA T608T	0.0462428	1	C	T	Var	Syn	PA	608	1825	PA	1824	T	T	PA_C1825T	2326	173	0	8
10724	C57BL/6	F	BALBF	1XP	1XP	Test (R11)	PA F611F	PA F611F	0.0169412	1	T	C	Var	Syn	PA	611	1834	PA	1833	F	F	PA_T1834C	4510	2125	0	36
9518	BALB/C	M	BALBM	1X	B	10	PA K615E	PA K615E	0.0688705	3	A	G	Var	Nonsyn	PA	615	1844	PA	1843	K	E	PA_A1844G	4658	363	0	25
10311	C57BL/6	F	BL6F	4X	ABCD	10	PA K615E	PA K615E	0.0344828	3	A	G	Var	Nonsyn	PA	615	1844	PA	1843	K	E	PA_A1844G	4658	2552	0	88
9516	BALB/C	M	BALBM	2X	AB	10	PA S616S	PA S616S	0.0255034	1	A	T	Var	Syn	PA	616	1849	PA	1848	S	S	PA_A1849T	4604	745	0	19
10309	C57BL/6	F	BL6F	1X	A	10	PA T618I	PA T618I	0.0151057	1	C	T	Var	Nonsyn	PA	618	1854	PA	1853	T	I	PA_C1854T	4609	1986	0	30
9518	BALB/C	M	BALBM	1X	B	10	PA P620P	PA P620P	0.076087	1	C	T	Var	Syn	PA	620	1861	PA	1860	P	P	PA_C1861T	2327	184	2	14
9500	BALB/C	M	BALBM	1X	C	10	PA E623G	PA E623G	0.173077	1	A	G	Var	Nonsyn	PA	623	1869	PA	1868	E	G	PA_A1869G	2251	52	0	9
8312	C57BL/6	F	BL6F	Stock	D	1	PA S624S	PA S624S	0.0246637	1	C	T	Var	Syn	PA	624	1873	PA	1872	S	S	PA_C1873T	2283	446	1	11
10314	C57BL/6	F	BL6F	1X	C	10	PA K635K	PA K635K	0.0232759	1	G	A	Var	Syn	PA	635	1906	PA	1905	K	K	PA_G1906A	4153	2320	0	54
9337	BALB/C	F	BALBF	2X	CD	4	PA R638R	PA R638R	0.113208	2	G	A	Var	Syn	PA	638	1915	PA	1914	R	R	PA_G1915A	1833	53	0	6
9516	BALB/C	M	BALBM	2X	AB	10	PA R638R	PA R638R	0.0299003	2	G	A	Var	Syn	PA	638	1915	PA	1914	R	R	PA_G1915A	1833	301	0	9
9516	BALB/C	M	BALBM	2X	AB	10	PA T639I	PA T639I	0.0223214	1	C	T	Var	Nonsyn	PA	639	1917	PA	1916	T	I	PA_C1917T	2083	448	0	10
10624	BALB/C	F	BALBF	2X	CD	Test (R11)	PA L640L	PA L640L	0.183521	3	A	G	Var	Syn	PA	640	1921	PA	1920	L	L	PA_A1921G	4035	267	2	49
97860	BALB/C	F	BALBF	2X	CD	10	PA L640L	PA L640L	0.176744	3	A	G	Var	Syn	PA	640	1921	PA	1920	L	L	PA_A1921G	4035	5590	2	988
9758	BALB/C	F	BALBF	1X	A	7	PA L649L	PA L649L	0.6	3	G	T	Var	Syn	PA	649	1948	PA	1947	L	L	PA_G1948T	2009	10	0	6
10732	C57BL/6	F	BALBF	1XP	1XP	Test (R11)	PA L649L	PA L649L	0.0162455	3	G	T	Var	Syn	PA	649	1948	PA	1947	L	L	PA_G1948T	2009	1108	0	18
97680	BALB/C	F	BALBF	1X	A	10	PA L649L	PA L649L	0.0294313	3	G	T	Var	Syn	PA	649	1948	PA	1947	L	L	PA_G1948T	4206	6014	0	177
9515	BALB/C	M	BALBM	1X	A	10	PA G657G	PA G657G	0.0170316	1	G	T	Var	Syn	PA	657	1972	PA	1971	G	G	PA_G1972T	2102	1233	0	21
9337	BALB/C	F	BALBF	2X	CD	4	PA E661E	PA E661E	0.08	5	G	A	Var	Syn	PA	661	1984	PA	1983	E	E	PA_G1984A	1836	100	0	8
9603	BALB/C	F	BALBF	2X	CD	7	PA E661E	PA E661E	0.15	5	G	A	Var	Syn	PA	661	1984	PA	1983	E	E	PA_G1984A	3851	200	0	30
10624	BALB/C	F	BALBF	2X	CD	Test (R11)	PA E661E	PA E661E	0.188623	5	G	A	Var	Syn	PA	661	1984	PA	1983	E	E	PA_G1984A	3851	334	0	63
97860	BALB/C	F	BALBF	2X	CD	10	PA E661E	PA E661E	0.126811	5	G	A	Var	Syn	PA	661	1984	PA	1983	E	E	PA_G1984A	3851	5315	0	674
10305	C57BL/6	M	BL6M	2X	CD	10	PA L665L	PA L665L	0.0833333	2	C	T	Var	Syn	PA	665	1994	PA	1993	L	L	PA_C1994T	3743	2136	0	178
9739	C57BL/6	F	BL6F	2X	AB	7	PA L666L	PA L666L	0.0231171	1	T	C	Var	Syn	PA	666	1999	PA	1998	L	L	PA_T1999C	1770	1341	2	31
10649	BALB/C	F	BALBF	1XP	1XP	Test (R11)	PA V668V	PA V668V	0.0621469	4	C	T	Var	Syn	PA	668	2005	PA	2004	V	V	PA_C2005T	1753	177	0	11
10724	C57BL/6	F	BALBF	1XP	1XP	Test (R11)	PA V668V	PA V668V	0.0188568	4	C	T	Var	Syn	PA	668	2005	PA	2004	V	V	PA_C2005T	3651	3394	0	64
10732	C57BL/6	F	BALBF	1XP	1XP	Test (R11)	PA V668V	PA V668V	0.0512479	4	C	T	Var	Syn	PA	668	2005	PA	2004	V	V	PA_C2005T	3651	3005	0	154
97680	BALB/C	F	BALBF	1X	A	10	PA V668V	PA V668V	0.0736501	4	C	T	Var	Syn	PA	668	2005	PA	2004	V	V	PA_C2005T	3651	5241	0	386
97680	BALB/C	F	BALBF	1X	A	10	PA V669I	PA V669I	0.0346544	4	G	A	Var	Nonsyn	PA	669	2006	PA	2005	V	I	PA_G2006A	3627	5223	0	181
9759	BALB/C	F	BALBF	2X	AB	7	PA Q670Q	PA Q670Q	0.0779221	3	G	A	Var	Syn	PA	670	2011	PA	2010	Q	Q	PA_G2011A	1877	77	0	6
97690	BALB/C	F	BALBF	2X	AB	10	PA Q670Q	PA Q670Q	0.0629312	3	G	A	Var	Syn	PA	670	2011	PA	2010	Q	Q	PA_G2011A	3614	4783	0	301
97760	BALB/C	F	BALBF	1X	D	10	PA K673K	PA K673K	0.0125184	1	G	A	Var	Syn	PA	673	2020	PA	2019	K	K	PA_G2020A	1875	2716	0	34
9603	BALB/C	F	BALBF	2X	CD	7	PA E677E	PA E677E	0.179104	1	A	G	Var	Syn	PA	677	2032	PA	2031	E	E	PA_A2032G	1747	67	0	12
9337	BALB/C	F	BALBF	2X	CD	4	PA L683L	PA L683L	0.0424242	2	T	C	Var	Syn	PA	683	2050	PA	2049	L	L	PA_T2050C	1496	165	0	7
9740	C57BL/6	F	BL6F	1X	A	7	PA L683L	PA L683L	0.0309278	2	T	C	Var	Syn	PA	683	2050	PA	2049	L	L	PA_T2050C	1614	679	0	21
9537	BALB/C	M	BALBM	2X	CD	10	PA G685G	PA G685G	0.0895522	1	G	A	Var	Syn	PA	685	2056	PA	2055	G	G	PA_G2056A	1570	134	0	12
8542	BALB/C	M	BALBM	Stock	A	1	PA S705S	PA S705S	0.080402	2	G	A	Var	Syn	PA	705	2116	PA	2115	S	S	PA_G2116A	1108	398	0	32
9518	BALB/C	M	BALBM	1X	B	10	PA S705S	PA S705S	0.107383	2	G	A	Var	Syn	PA	705	2116	PA	2115	S	S	PA_G2116A	1108	149	0	16
10309	C57BL/6	F	BL6F	1X	A	10	PA L711L	PA L711L	0.0327983	1	A	G	Var	Syn	PA	711	2134	PA	2133	L	L	PA_A2134G	949	1433	0	47
10309	C57BL/6	F	BL6F	1X	A	10	PA R716R	PA R716R	0.0600261	1	A	G	Var	Syn	PA	716	2149	PA	2148	R	R	PA_A2149G	1608	2299	0	138
10299	C57BL/6	M	BL6M	1X	A	10	PB1 G26E	PB1 G26E	0.0503979	1	G	A	Var	Nonsyn	PB1	26	77	PB1	77	G	E	PB1_G77A	1601	377	0	19
10304	C57BL/6	M	BL6M	1X	C	10	PB1 H47H ; PB1_F2 I16T	PB1 H47H ; PB1_F2 I16T	0.0344203	1	T	C	Var	Syn; Nonsyn	PB1	47; 16	141	PB1; PB1_F2	141; 47	H; I	H; T	PB1_T141C	6188	552	0	19
97760	BALB/C	F	BALBF	1X	D	10	PB1 G53G ; PB1_F2 G22E	PB1 G53G ; PB1_F2 G22E	0.999214	4	G	A	Var	Syn; Nonsyn	PB1	53; 22	159	PB1; PB1_F2	159; 65	G; G	G; E	PB1_G159A	6368	2544	1	2542
97690	BALB/C	F	BALBF	2X	AB	10	PB1 K54K ; PB1_F2 S23N	PB1 K54K ; PB1_F2 S23N	0.0117454	4	G	A	Var	Syn; Nonsyn	PB1	54; 23	162	PB1; PB1_F2	162; 68	K; S	K; N	PB1_G162A	6555	4257	3	50
97760	BALB/C	F	BALBF	1X	D	10	PB1 T56T ; PB1_F2 Q25R	PB1 T56T ; PB1_F2 Q25R	0.0151791	1	A	G	Var	Syn; Nonsyn	PB1	56; 25	168	PB1; PB1_F2	168; 74	T; Q	T; R	PB1_A168G	3457	1647	0	25
9517	BALB/C	M	BALBM	4X	ABCD	10	PB1 A63A ; PB1_F2 R32H	PB1 A63A ; PB1_F2 R32H	0.104925	2	G	A	Var	Syn; Nonsyn	PB1	63; 32	189	PB1; PB1_F2	189; 95	A; R	A; H	PB1_G189A	6820	467	0	49
10317	C57BL/6	F	BL6F	1X	D	10	PB1 I69V ; PB1_F2 Q37Q	PB1 I69V ; PB1_F2 Q37Q	0.0319149	1	A	G	Var	Nonsyn; Syn	PB1	69; 37	205	PB1; PB1_F2	205; 111	I; Q	V; Q	PB1_A205G	4018	188	2	6
10317	C57BL/6	F	BL6F	1X	D	10	PB1 L73R ; PB1_F2 Y42D	PB1 L73R ; PB1_F2 Y42D	0.0444444	1	T	G	Var	Nonsyn; Nonsyn	PB1	73; 42	218	PB1; PB1_F2	218; 124	L; Y	R; D	PB1_T218G	3725	90	0	4
10305	C57BL/6	M	BL6M	2X	CD	10	PB1 E78E ; PB1_F2 S47N	PB1 E78E ; PB1_F2 S47N	0.0789474	1	G	A	Var	Syn; Nonsyn	PB1	78; 47	234	PB1; PB1_F2	234; 140	E; S	E; N	PB1_G234A	4274	76	0	6
97860	BALB/C	F	BALBF	2X	CD	10	PB1 A93A ; PB1_F2 L62R	PB1 A93A ; PB1_F2 L62R	0.0226171	2	T	G	Var	Syn; Nonsyn	PB1	93; 62	279	PB1; PB1_F2	279; 185	A; L	A; R	PB1_T279G	8720	3714	0	84
10304	C57BL/6	M	BL6M	1X	C	10	PB1 L95P ; PB1_F2 L64L	PB1 L95P ; PB1_F2 L64L	0.0339806	1	T	C	Var	Nonsyn; Syn	PB1	95; 64	284	PB1; PB1_F2	284; 190	L; L	P; L	PB1_T284C	4693	206	0	7
9516	BALB/C	M	BALBM	2X	AB	10	PB1 S98S ; PB1_F2 P67L	PB1 S98S ; PB1_F2 P67L	0.0958904	1	C	T	Var	Syn; Nonsyn	PB1	98; 67	294	PB1; PB1_F2	294; 200	S; P	S; L	PB1_C294T	4713	73	3	7
10309	C57BL/6	F	BL6F	1X	A	10	PB1 H99Y ; PB1_F2 P67P	PB1 H99Y ; PB1_F2 P67P	0.0529801	1	C	T	Var	Nonsyn; Syn	PB1	99; 67	295	PB1; PB1_F2	295; 201	H; P	Y; P	PB1_C295T	4145	302	2	16
10302	C57BL/6	M	BL6M	1X	B	10	PB1 G101R ; PB1_F2 Q69Q	PB1 G101R ; PB1_F2 Q69Q	0.0277778	1	G	A	Var	Nonsyn; Syn	PB1	101; 69	301	PB1; PB1_F2	301; 207	G; Q	R; Q	PB1_G301A	4357	180	0	5
9517	BALB/C	M	BALBM	4X	ABCD	10	PB1 N105T ; PB1_F2 T74P	PB1 N105T ; PB1_F2 T74P	0.0454545	1	A	C	Var	Nonsyn; Nonsyn	PB1	105; 74	314	PB1; PB1_F2	314; 220	N; T	T; P	PB1_A314C	9030	352	0	16
10302	C57BL/6	M	BL6M	1X	B	10	PB1 S106P ; PB1_F2 T74T	PB1 S106P ; PB1_F2 T74T	0.0326797	1	T	C	Var	Nonsyn; Syn	PB1	106; 74	316	PB1; PB1_F2	316; 222	S; T	P; T	PB1_T316C	3885	153	0	5
10305	C57BL/6	M	BL6M	2X	CD	10	PB1.PB1_F2.S.R.106.75.NA	PB1.PB1_F2.S.R.106.75.NA	0.0645161	1	G	A	Var	Syn; Nonsyn	PB1	106; 75	318	PB1; PB1_F2	318; 224	S; R	NA	PB1_G318A	4290	62	2	4
10309	C57BL/6	F	BL6F	1X	A	10	PB1 C107C ; PB1_F2 V76A	PB1 C107C ; PB1_F2 V76A	0.026616	1	T	C	Var	Syn; Nonsyn	PB1	107; 76	321	PB1; PB1_F2	321; 227	C; V	C; A	PB1_T321C	4725	263	1	7
97830	BALB/C	F	BALBF	1X	C	10	PB1 R135R	PB1 R135R	0.0509114	1	A	G	Var	Syn	PB1	135	405	PB1	405	R	R	PB1_A405G	8848	3182	0	162
8235	C57BL/6	M	BL6M	Stock	C	1	PB1 N136N	PB1 N136N	0.0442478	2	T	C	Var	Syn	PB1	136	408	PB1	408	N	N	PB1_T408C	3943	113	0	5
97830	BALB/C	F	BALBF	1X	C	10	PB1 A144A	PB1 A144A	0.0113578	1	C	T	Var	Syn	PB1	144	432	PB1	432	A	A	PB1_C432T	4943	1937	0	22
8541	BALB/C	M	BALBM	Stock	C	1	PB1 S152S	PB1 S152S	0.0305344	2	G	A	Var	Syn	PB1	152	456	PB1	456	S	S	PB1_G456A	4388	131	0	4
97680	BALB/C	F	BALBF	1X	A	10	PB1 G161G	PB1 G161G	0.0107034	1	A	G	Var	Syn	PB1	161	483	PB1	483	G	G	PB1_A483G	8780	3270	4	35
10220	C57BL/6	F	BL6F	2X	CD	10	PB1 L167L	PB1 L167L	0.0715746	1	C	T	Var	Syn	PB1	167	501	PB1	501	L	L	PB1_C501T	8988	489	3	35
10299	C57BL/6	M	BL6M	1X	A	10	PB1 E172G	PB1 E172G	0.121951	1	A	G	Var	Nonsyn	PB1	172	515	PB1	515	E	G	PB1_A515G	4416	41	2	5
10304	C57BL/6	M	BL6M	1X	C	10	PB1 D175D	PB1 D175D	0.0230769	1	T	C	Var	Syn	PB1	175	525	PB1	525	D	D	PB1_T525C	8909	390	0	9
10304	C57BL/6	M	BL6M	1X	C	10	PB1 Q186Q	PB1 Q186Q	0.0186567	1	A	G	Var	Syn	PB1	186	558	PB1	558	Q	Q	PB1_A558G	4556	268	0	5
97860	BALB/C	F	BALBF	2X	CD	10	PB1 K188R	PB1 K188R	0.0345135	2	A	G	Var	Nonsyn	PB1	188	563	PB1	563	K	R	PB1_A563G	9529	3361	2	116
9516	BALB/C	M	BALBM	2X	AB	10	PB1 G206G	PB1 G206G	0.325	1	A	G	Var	Syn	PB1	206	618	PB1	618	G	G	PB1_A618G	9003	40	4	13
97730	BALB/C	F	BALBF	1X	B	10	PB1 K207R	PB1 K207R	0.012285	3	A	G	Var	Nonsyn	PB1	207	620	PB1	620	K	R	PB1_A620G	8916	3256	2	40
10313	C57BL/6	F	BL6F	2X	AB	10	PB1 K207R	PB1 K207R	0.0806452	3	A	G	Var	Nonsyn	PB1	207	620	PB1	620	K	R	PB1_A620G	4380	62	2	5
9518	BALB/C	M	BALBM	1X	B	10	PB1 K209R	PB1 K209R	0.217391	3	A	G	Var	Nonsyn	PB1	209	626	PB1	626	K	R	PB1_A626G	4625	23	1	5
97730	BALB/C	F	BALBF	1X	B	10	PB1 V212M	PB1 V212M	0.0127369	2	G	A	Var	Nonsyn	PB1	212	634	PB1	634	V	M	PB1_G634A	8758	3219	3	41
97730	BALB/C	F	BALBF	1X	B	10	PB1 K214K	PB1 K214K	0.00985525	2	G	A	Var	Syn	PB1	214	642	PB1	642	K	K	PB1_G642A	9005	3247	2	32
10314	C57BL/6	F	BL6F	1X	C	10	PB1 Y217Y	PB1 Y217Y	0.0338983	1	T	C	Var	Syn	PB1	217	651	PB1	651	Y	Y	PB1_T651C	4068	118	0	4
97850	BALB/C	F	BALBF	4X	ABCD	10	PB1 L224L	PB1 L224L	0.0230769	2	T	C	Var	Syn	PB1	224	670	PB1	670	L	L	PB1_T670C	9051	2730	2	63
97680	BALB/C	F	BALBF	1X	A	10	PB1 L224L	PB1 L224L	0.0145228	1	G	A	Var	Syn	PB1	224	672	PB1	672	L	L	PB1_G672A	9095	3374	0	49
9287	C57BL/6	F	BL6F	2X	CD	4	PB1 L236L	PB1 L236L	0.0487805	1	T	C	Var	Syn	PB1	236	706	PB1	706	L	L	PB1_T706C	4394	82	0	4
9767	BALB/C	F	BALBF	1X	C	7	PB1 L236L	PB1 L236L	0.541667	3	A	G	Var	Syn	PB1	236	708	PB1	708	L	L	PB1_A708G	8688	24	0	13
10724	C57BL/6	F	BALBF	1XP	1XP	Test (R11)	PB1 L236L	PB1 L236L	0.0462963	3	A	G	Var	Syn	PB1	236	708	PB1	708	L	L	PB1_A708G	4256	108	0	5
97830	BALB/C	F	BALBF	1X	C	10	PB1 L236L	PB1 L236L	0.20428	3	A	G	Var	Syn	PB1	236	708	PB1	708	L	L	PB1_A708G	8688	2570	0	525
97680	BALB/C	F	BALBF	1X	A	10	PB1 T257I	PB1 T257I	0.0138799	1	C	T	Var	Nonsyn	PB1	257	770	PB1	770	T	I	PB1_C770T	8673	3098	2	43
10220	C57BL/6	F	BL6F	2X	CD	10	PB1 A259A	PB1 A259A	0.206544	1	T	C	Var	Syn	PB1	259	777	PB1	777	A	A	PB1_T777C	8769	489	0	101
10009	C57BL/6	M	BL6M	4X	ABCD	10	PB1 R260R	PB1 R260R	0.563492	1	G	A	Var	Syn	PB1	260	780	PB1	780	R	R	PB1_G780A	8830	126	2	71
10313	C57BL/6	F	BL6F	2X	AB	10	PB1 V273I	PB1 V273I	0.698413	3	G	A	Var	Nonsyn	PB1	273	817	PB1	817	V	I	PB1_G817A	8785	126	1	88
10313	C57BL/6	F	BL6F	2X	AB	10	PB1 V286V	PB1 V286V	0.193548	1	G	A	Var	Syn	PB1	286	858	PB1	858	V	V	PB1_G858A	8820	124	0	24
97680	BALB/C	F	BALBF	1X	A	10	PB1 G304G	PB1 G304G	0.0283822	1	A	G	Var	Syn	PB1	304	912	PB1	912	G	G	PB1_A912G	8628	3171	8	90
9516	BALB/C	M	BALBM	2X	AB	10	PB1 K308K	PB1 K308K	0.136364	1	A	G	Var	Syn	PB1	308	924	PB1	924	K	K	PB1_A924G	4216	22	0	3
10312	C57BL/6	F	BL6F	1X	B	10	PB1 F333F	PB1 F333F	0.0638298	1	C	T	Var	Syn	PB1	333	999	PB1	999	F	F	PB1_C999T	4399	188	0	12
10317	C57BL/6	F	BL6F	1X	D	10	PB1 V336V	PB1 V336V	0.0980392	1	T	C	Var	Syn	PB1	336	1008	PB1	1008	V	V	PB1_T1008C	4468	51	0	5
97690	BALB/C	F	BALBF	2X	AB	10	PB1 I339I	PB1 I339I	0.0139211	1	C	A	Var	Syn	PB1	339	1017	PB1	1017	I	I	PB1_C1017A	8788	2155	0	30
97680	BALB/C	F	BALBF	1X	A	10	PB1 A349A	PB1 A349A	0.0216688	1	G	A	Var	Syn	PB1	349	1047	PB1	1047	A	A	PB1_G1047A	8302	3092	3	67
97860	BALB/C	F	BALBF	2X	CD	10	PB1 K360K	PB1 K360K	0.025	2	G	A	Var	Syn	PB1	360	1080	PB1	1080	K	K	PB1_G1080A	8571	2800	0	70
10307	C57BL/6	M	BL6M	1X	D	10	PB1 M362T	PB1 M362T	0.037594	1	T	C	Var	Nonsyn	PB1	362	1085	PB1	1085	M	T	PB1_T1085C	4279	133	1	5
97860	BALB/C	F	BALBF	2X	CD	10	PB1 R365R	PB1 R365R	0.0116061	2	C	A	Var	Syn	PB1	365	1093	PB1	1093	R	R	PB1_C1093A	8327	2671	0	31
97730	BALB/C	F	BALBF	1X	B	10	PB1 I368V	PB1 I368V	0.0123457	1	A	G	Var	Nonsyn	PB1	368	1102	PB1	1102	I	V	PB1_A1102G	8588	2997	1	37
9297	C57BL/6	F	BL6F	2X	AB	4	PB1 A370A	PB1 A370A	0.0571429	1	A	G	Var	Syn	PB1	370	1110	PB1	1110	A	A	PB1_A1110G	4415	70	1	4
97860	BALB/C	F	BALBF	2X	CD	10	PB1 E371E	PB1 E371E	0.0150646	1	A	G	Var	Syn	PB1	371	1113	PB1	1113	E	E	PB1_A1113G	4258	1394	2	21
10312	C57BL/6	F	BL6F	1X	B	10	PB1 R386R	PB1 R386R	0.0739437	1	A	G	Var	Syn	PB1	386	1158	PB1	1158	R	R	PB1_A1158G	8680	284	4	21
97730	BALB/C	F	BALBF	1X	B	10	PB1 G399S	PB1 G399S	0.0105402	2	G	A	Var	Nonsyn	PB1	399	1195	PB1	1195	G	S	PB1_G1195A	4415	1518	0	16
10307	C57BL/6	M	BL6M	1X	D	10	PB1 G399S	PB1 G399S	0.0545455	2	G	A	Var	Nonsyn	PB1	399	1195	PB1	1195	G	S	PB1_G1195A	8588	220	4	12
97690	BALB/C	F	BALBF	2X	AB	10	PB1 G406G	PB1 G406G	0.0117773	1	A	G	Var	Syn	PB1	406	1218	PB1	1218	G	G	PB1_A1218G	4412	934	0	11
10304	C57BL/6	M	BL6M	1X	C	10	PB1 L415L	PB1 L415L	0.0430839	1	C	T	Var	Syn	PB1	415	1243	PB1	1243	L	L	PB1_C1243T	8612	441	5	19
97860	BALB/C	F	BALBF	2X	CD	10	PB1 K429K	PB1 K429K	0.00972272	2	G	A	Var	Syn	PB1	429	1287	PB1	1287	K	K	PB1_G1287A	8616	2777	1	27
10304	C57BL/6	M	BL6M	1X	C	10	PB1 D439N	PB1 D439N	0.0198413	1	G	A	Var	Nonsyn	PB1	439	1315	PB1	1315	D	N	PB1_G1315A	4282	252	0	5
10312	C57BL/6	F	BL6F	1X	B	10	PB1 L441P	PB1 L441P	0.027027	1	T	C	Var	Nonsyn	PB1	441	1322	PB1	1322	L	P	PB1_T1322C	4323	185	1	5
10300	C57BL/6	M	BL6M	2X	AB	10	PB1 H456N	PB1 H456N	0.200599	1	C	A	Var	Nonsyn	PB1	456	1366	PB1	1366	H	N	PB1_C1366A	9516	334	0	67
10312	C57BL/6	F	BL6F	1X	B	10	PB1 E457K	PB1 E457K	0.938235	3	G	A	Var	Nonsyn	PB1	457	1369	PB1	1369	E	K	PB1_G1369A	9467	340	0	319
97860	BALB/C	F	BALBF	2X	CD	10	PB1 D464N	PB1 D464N	0.0630713	8	G	A	Var	Nonsyn	PB1	464	1390	PB1	1390	D	N	PB1_G1390A	9704	3282	1	207
10313	C57BL/6	F	BL6F	2X	AB	10	PB1 D464N	PB1 D464N	0.120172	8	G	A	Var	Nonsyn	PB1	464	1390	PB1	1390	D	N	PB1_G1390A	9704	233	1	28
97680	BALB/C	F	BALBF	1X	A	10	PB1 D464D	PB1 D464D	0.0176823	3	T	C	Var	Syn	PB1	464	1392	PB1	1392	D	D	PB1_T1392C	9647	3676	3	65
10317	C57BL/6	F	BL6F	1X	D	10	PB1 T469T	PB1 T469T	0.0373832	1	C	A	Var	Syn	PB1	469	1407	PB1	1407	T	T	PB1_C1407A	5031	107	0	4
9603	BALB/C	F	BALBF	2X	CD	7	PB1 V473V	PB1 V473V	0.333333	5	C	T	Var	Syn	PB1	473	1419	PB1	1419	V	V	PB1_C1419T	4660	12	0	4
10305	C57BL/6	M	BL6M	2X	CD	10	PB1 V473V	PB1 V473V	0.0526316	5	C	T	Var	Syn	PB1	473	1419	PB1	1419	V	V	PB1_C1419T	5093	95	0	5
97860	BALB/C	F	BALBF	2X	CD	10	PB1 V473V	PB1 V473V	0.0185862	5	C	T	Var	Syn	PB1	473	1419	PB1	1419	V	V	PB1_C1419T	9753	3282	0	61
10307	C57BL/6	M	BL6M	1X	D	10	PB1 R486M	PB1 R486M	0.326241	2	G	T	Var	Nonsyn	PB1	486	1457	PB1	1457	R	M	PB1_G1457T	10636	423	0	138
9045	C57BL/6	F	BL6F	4X	ABCD	4	PB1 R486R	PB1 R486R	0.0902111	4	G	A	Var	Syn	PB1	486	1458	PB1	1458	R	R	PB1_G1458A	10533	521	0	47
9738	C57BL/6	F	BL6F	4X	ABCD	7	PB1 R486R	PB1 R486R	0.606936	4	G	A	Var	Syn	PB1	486	1458	PB1	1458	R	R	PB1_G1458A	10533	173	0	105
10311	C57BL/6	F	BL6F	4X	ABCD	10	PB1 R486R	PB1 R486R	0.911672	4	G	A	Var	Syn	PB1	486	1458	PB1	1458	R	R	PB1_G1458A	10533	317	0	289
10309	C57BL/6	F	BL6F	1X	A	10	PB1 S494N	PB1 S494N	0.0323625	1	G	A	Var	Nonsyn	PB1	494	1481	PB1	1481	S	N	PB1_G1481A	4854	309	0	10
9515	BALB/C	M	BALBM	1X	A	10	PB1 S494S	PB1 S494S	0.966667	1	C	T	Var	Syn	PB1	494	1482	PB1	1482	S	S	PB1_C1482T	9861	60	1	58
9293	C57BL/6	F	BL6F	1X	A	4	PB1 Y497Y	PB1 Y497Y	0.0285714	3	T	C	Var	Syn	PB1	497	1491	PB1	1491	Y	Y	PB1_T1491C	5153	140	0	4
9750	BALB/C	F	BALBF	4X	ABCD	7	PB1 Y497Y	PB1 Y497Y	0.116279	3	T	C	Var	Syn	PB1	497	1491	PB1	1491	Y	Y	PB1_T1491C	5153	43	0	5
10732	C57BL/6	F	BALBF	1XP	1XP	Test (R11)	PB1 Y497Y	PB1 Y497Y	0.0215633	3	T	C	Var	Syn	PB1	497	1491	PB1	1491	Y	Y	PB1_T1491C	5153	371	0	8
9296	C57BL/6	F	BL6F	1X	B	4	PB1 G500G	PB1 G500G	0.031746	2	A	G	Var	Syn	PB1	500	1500	PB1	1500	G	G	PB1_A1500G	4840	189	1	6
10305	C57BL/6	M	BL6M	2X	CD	10	PB1 G500G	PB1 G500G	0.0705128	2	A	G	Var	Syn	PB1	500	1500	PB1	1500	G	G	PB1_A1500G	5247	156	0	11
10724	C57BL/6	F	BALBF	1XP	1XP	Test (R11)	PB1 F505F	PB1 F505F	0.0668524	3	T	C	Var	Syn	PB1	505	1515	PB1	1515	F	F	PB1_T1515C	9907	718	2	48
10732	C57BL/6	F	BALBF	1XP	1XP	Test (R11)	PB1 F505F	PB1 F505F	0.0543175	3	T	C	Var	Syn	PB1	505	1515	PB1	1515	F	F	PB1_T1515C	9907	718	2	39
97680	BALB/C	F	BALBF	1X	A	10	PB1 F505F	PB1 F505F	0.139572	3	T	C	Var	Syn	PB1	505	1515	PB1	1515	F	F	PB1_T1515C	9907	3740	2	522
10009	C57BL/6	M	BL6M	4X	ABCD	10	PB1 P510P	PB1 P510P	0.0784983	2	C	T	Var	Syn	PB1	510	1530	PB1	1530	P	P	PB1_C1530T	9873	293	0	23
10302	C57BL/6	M	BL6M	1X	B	10	PB1 F512L	PB1 F512L	0.0276243	1	T	C	Var	Nonsyn	PB1	512	1534	PB1	1534	F	L	PB1_T1534C	4817	181	0	5
97690	BALB/C	F	BALBF	2X	AB	10	PB1 V514V	PB1 V514V	0.0238949	1	G	A	Var	Syn	PB1	514	1542	PB1	1542	V	V	PB1_G1542A	9917	2511	1	60
9516	BALB/C	M	BALBM	2X	AB	10	PB1 I517T	PB1 I517T	0.056338	1	T	C	Var	Nonsyn	PB1	517	1550	PB1	1550	I	T	PB1_T1550C	4802	71	0	4
10317	C57BL/6	F	BL6F	1X	D	10	PB1 A521V	PB1 A521V	0.0833333	1	C	T	Var	Nonsyn	PB1	521	1562	PB1	1562	A	V	PB1_C1562T	4656	144	0	12
9737	C57BL/6	F	BL6F	1X	B	7	PB1 A521A	PB1 A521A	0.015534	2	T	C	Var	Syn	PB1	521	1563	PB1	1563	A	A	PB1_T1563C	4649	515	2	8
10624	BALB/C	F	BALBF	2X	CD	Test (R11)	PB1 A521A	PB1 A521A	0.0645161	2	T	C	Var	Syn	PB1	521	1563	PB1	1563	A	A	PB1_T1563C	4649	62	2	4
9536	BALB/C	M	BALBM	1X	D	10	PB1 I525I	PB1 I525I	0.114286	1	T	C	Var	Syn	PB1	525	1575	PB1	1575	I	I	PB1_T1575C	4651	35	0	4
8539	BALB/C	M	BALBM	Stock	D	1	PB1 G526G	PB1 G526G	0.0540541	2	A	G	Var	Syn	PB1	526	1578	PB1	1578	G	G	PB1_A1578G	4995	74	1	4
10724	C57BL/6	F	BALBF	1XP	1XP	Test (R11)	PB1 G526G	PB1 G526G	0.0203666	2	A	G	Var	Syn	PB1	526	1578	PB1	1578	G	G	PB1_A1578G	4995	491	1	10
97830	BALB/C	F	BALBF	1X	C	10	PB1 V527I	PB1 V527I	0.0309859	1	G	A	Var	Nonsyn	PB1	527	1579	PB1	1579	V	I	PB1_G1579A	9745	3195	3	99
97680	BALB/C	F	BALBF	1X	A	10	PB1 K531R	PB1 K531R	0.0136948	3	A	G	Var	Nonsyn	PB1	531	1592	PB1	1592	K	R	PB1_A1592G	9514	3578	6	49
10311	C57BL/6	F	BL6F	4X	ABCD	10	PB1 N533S	PB1 N533S	0.0230769	1	A	G	Var	Nonsyn	PB1	533	1598	PB1	1598	N	S	PB1_A1598G	4882	260	2	6
9286	C57BL/6	F	BL6F	1X	C	4	PB1 G540G	PB1 G540G	0.0169082	3	A	G	Var	Syn	PB1	540	1620	PB1	1620	G	G	PB1_A1620G	5071	414	2	7
9738	C57BL/6	F	BL6F	4X	ABCD	7	PB1 P541P	PB1 P541P	0.05	1	A	C	Var	Syn	PB1	541	1623	PB1	1623	P	P	PB1_A1623C	4983	80	0	4
10304	C57BL/6	M	BL6M	1X	C	10	PB1 A544V	PB1 A544V	0.0168067	1	C	T	Var	Nonsyn	PB1	544	1631	PB1	1631	A	V	PB1_C1631T	5057	357	0	6
10220	C57BL/6	F	BL6F	2X	CD	10	PB1 M546V	PB1 M546V	0.0125448	1	A	G	Var	Nonsyn	PB1	546	1636	PB1	1636	M	V	PB1_A1636G	4569	558	0	7
97690	BALB/C	F	BALBF	2X	AB	10	PB1 L548L	PB1 L548L	0.0187473	1	T	G	Var	Syn	PB1	548	1644	PB1	1644	L	L	PB1_T1644G	9442	2347	0	44
10304	C57BL/6	M	BL6M	1X	C	10	PB1 F551S	PB1 F551S	0.016129	1	T	C	Var	Nonsyn	PB1	551	1652	PB1	1652	F	S	PB1_T1652C	4240	372	0	6
10732	C57BL/6	F	BALBF	1XP	1XP	Test (R11)	PB1 R556R	PB1 R556R	0.014658	1	A	G	Var	Syn	PB1	556	1668	PB1	1668	R	R	PB1_A1668G	5269	614	0	9
10305	C57BL/6	M	BL6M	2X	CD	10	PB1 Y557Y	PB1 Y557Y	0.0273973	1	T	C	Var	Syn	PB1	557	1671	PB1	1671	Y	Y	PB1_T1671C	5246	219	1	6
10305	C57BL/6	M	BL6M	2X	CD	10	PB1 R560Q	PB1 R560Q	0.0361991	1	G	A	Var	Nonsyn	PB1	560	1679	PB1	1679	R	Q	PB1_G1679A	4543	221	3	8
10299	C57BL/6	M	BL6M	1X	A	10	PB1 G564E	PB1 G564E	0.0333333	1	G	A	Var	Nonsyn	PB1	564	1691	PB1	1691	G	E	PB1_G1691A	5142	150	0	5
10313	C57BL/6	F	BL6F	2X	AB	10	PB1 G564G	PB1 G564G	0.0289855	3	A	G	Var	Syn	PB1	564	1692	PB1	1692	G	G	PB1_A1692G	4563	207	0	6
9517	BALB/C	M	BALBM	4X	ABCD	10	PB1 I568L	PB1 I568L	0.012966	1	A	C	Var	Nonsyn	PB1	568	1702	PB1	1702	I	L	PB1_A1702C	5039	617	0	8
97860	BALB/C	F	BALBF	2X	CD	10	PB1 Q569Q	PB1 Q569Q	0.0146409	2	G	A	Var	Syn	PB1	569	1707	PB1	1707	Q	Q	PB1_G1707A	9621	3620	1	53
8235	C57BL/6	M	BL6M	Stock	C	1	PB1 L576L	PB1 L576L	0.03125	1	C	T	Var	Syn	PB1	576	1726	PB1	1726	L	L	PB1_C1726T	5255	160	1	5
97850	BALB/C	F	BALBF	4X	ABCD	10	PB1 K577E	PB1 K577E	0.0115078	6	A	G	Var	Nonsyn	PB1	577	1729	PB1	1729	K	E	PB1_A1729G	10363	3389	0	39
10314	C57BL/6	F	BL6F	1X	C	10	PB1 K577E	PB1 K577E	0.948941	6	A	G	Var	Nonsyn	PB1	577	1729	PB1	1729	K	E	PB1_A1729G	10363	803	0	762
10317	C57BL/6	F	BL6F	1X	D	10	PB1 K577*	PB1 K577*	0.0273038	1	A	T	Var	Stop	PB1	577	1729	PB1	1729	K	*	PB1_A1729T	5317	293	0	8
10311	C57BL/6	F	BL6F	4X	ABCD	10	PB1 K578M	PB1 K578M	0.900552	4	A	T	Var	Nonsyn	PB1	578	1733	PB1	1733	K	M	PB1_A1733T	10212	543	0	489
10304	C57BL/6	M	BL6M	1X	C	10	PB1 L579L	PB1 L579L	0.0158371	1	C	T	Var	Syn	PB1	579	1735	PB1	1735	L	L	PB1_C1735T	5274	442	2	7
9459	C57BL/6	F	BL6F	1X	D	4	PB1 Q582Q	PB1 Q582Q	0.592593	1	A	G	Var	Syn	PB1	582	1746	PB1	1746	Q	Q	PB1_A1746G	5147	54	2	32
9767	BALB/C	F	BALBF	1X	C	7	PB1 R584R	PB1 R584R	0.0652174	1	C	T	Var	Syn	PB1	584	1752	PB1	1752	R	R	PB1_C1752T	4998	92	2	6
9517	BALB/C	M	BALBM	4X	ABCD	10	PB1 P596L	PB1 P596L	0.0109589	1	C	T	Var	Nonsyn	PB1	596	1787	PB1	1787	P	L	PB1_C1787T	5645	730	0	8
97860	BALB/C	F	BALBF	2X	CD	10	PB1 P596P	PB1 P596P	0.0402999	2	A	G	Var	Syn	PB1	596	1788	PB1	1788	P	P	PB1_A1788G	10981	4268	2	172
8235	C57BL/6	M	BL6M	Stock	C	1	PB1 L604L	PB1 L604L	0.041958	1	T	C	Var	Syn	PB1	604	1812	PB1	1812	L	L	PB1_T1812C	5199	143	1	6
10220	C57BL/6	F	BL6F	2X	CD	10	PB1 W613R	PB1 W613R	0.0132353	1	T	C	Var	Nonsyn	PB1	613	1837	PB1	1837	W	R	PB1_T1837C	5003	680	0	9
10220	C57BL/6	F	BL6F	2X	CD	10	PB1 E614G	PB1 E614G	0.0172084	1	A	G	Var	Nonsyn	PB1	614	1841	PB1	1841	E	G	PB1_A1841G	5453	523	5	9
9516	BALB/C	M	BALBM	2X	AB	10	PB1 D617D	PB1 D617D	0.0314136	1	T	C	Var	Syn	PB1	617	1851	PB1	1851	D	D	PB1_T1851C	5510	191	0	6
10626	BALB/C	F	BALBF	1XP	1XP	Test (R11)	PB1 E618E	PB1 E618E	0.5625	2	G	A	Var	Syn	PB1	618	1854	PB1	1854	E	E	PB1_G1854A	5201	32	1	18
97680	BALB/C	F	BALBF	1X	A	10	PB1 E618E	PB1 E618E	0.0140062	2	G	A	Var	Syn	PB1	618	1854	PB1	1854	E	E	PB1_G1854A	10701	4498	3	63
9459	C57BL/6	F	BL6F	1X	D	4	PB1 Y620Y	PB1 Y620Y	0.27451	1	T	C	Var	Syn	PB1	620	1860	PB1	1860	Y	Y	PB1_T1860C	5434	51	0	14
10009	C57BL/6	M	BL6M	4X	ABCD	10	PB1 R623K	PB1 R623K	0.0225806	1	G	A	Var	Nonsyn	PB1	623	1868	PB1	1868	R	K	PB1_G1868A	5360	310	0	7
10305	C57BL/6	M	BL6M	2X	CD	10	PB1 N626D	PB1 N626D	0.0718954	1	A	G	Var	Nonsyn	PB1	626	1876	PB1	1876	N	D	PB1_A1876G	5463	306	2	22
10305	C57BL/6	M	BL6M	2X	CD	10	PB1 N629N	PB1 N629N	0.0580205	1	T	C	Var	Syn	PB1	629	1887	PB1	1887	N	N	PB1_T1887C	5311	293	0	17
10305	C57BL/6	M	BL6M	2X	CD	10	PB1 P630Q	PB1 P630Q	0.105442	1	C	A	Var	Nonsyn	PB1	630	1889	PB1	1889	P	Q	PB1_C1889A	5262	294	0	31
9517	BALB/C	M	BALBM	4X	ABCD	10	PB1 V632V	PB1 V632V	0.0189655	1	C	T	Var	Syn	PB1	632	1896	PB1	1896	V	V	PB1_C1896T	4859	580	1	11
10307	C57BL/6	M	BL6M	1X	D	10	PB1 E636G	PB1 E636G	0.0185676	2	A	G	Var	Nonsyn	PB1	636	1907	PB1	1907	E	G	PB1_A1907G	5255	377	0	7
10299	C57BL/6	M	BL6M	1X	A	10	PB1 E636E	PB1 E636E	0.0748299	1	G	A	Var	Syn	PB1	636	1908	PB1	1908	E	E	PB1_G1908A	5005	294	1	22
10317	C57BL/6	F	BL6F	1X	D	10	PB1 E638K	PB1 E638K	0.247756	3	G	A	Var	Nonsyn	PB1	638	1912	PB1	1912	E	K	PB1_G1912A	10378	557	0	138
8312	C57BL/6	F	BL6F	Stock	D	1	PB1 E638E	PB1 E638E	0.0635838	1	G	A	Var	Syn	PB1	638	1914	PB1	1914	E	E	PB1_G1914A	5354	173	1	11
10302	C57BL/6	M	BL6M	1X	B	10	PB1 V640V	PB1 V640V	0.10219	3	A	G	Var	Syn	PB1	640	1920	PB1	1920	V	V	PB1_A1920G	5278	137	1	14
97730	BALB/C	F	BALBF	1X	B	10	PB1 V645I	PB1 V645I	0.0128663	2	G	A	Var	Nonsyn	PB1	645	1933	PB1	1933	V	I	PB1_G1933A	10139	4197	3	54
9750	BALB/C	F	BALBF	4X	ABCD	7	PB1 H649H	PB1 H649H	0.0336134	1	T	C	Var	Syn	PB1	649	1947	PB1	1947	H	H	PB1_T1947C	5046	119	0	4
9517	BALB/C	M	BALBM	4X	ABCD	10	PB1 P651P	PB1 P651P	0.0146413	2	A	G	Var	Syn	PB1	651	1953	PB1	1953	P	P	PB1_A1953G	5104	683	0	10
97830	BALB/C	F	BALBF	1X	C	10	PB1 A652S	PB1 A652S	0.0228909	1	G	T	Var	Nonsyn	PB1	652	1954	PB1	1954	A	S	PB1_G1954T	10030	3888	1	89
10304	C57BL/6	M	BL6M	1X	C	10	PB1 K653K	PB1 K653K	0.0143541	1	G	A	Var	Syn	PB1	653	1959	PB1	1959	K	K	PB1_G1959A	5078	418	0	6
10305	C57BL/6	M	BL6M	2X	CD	10	PB1 S654G	PB1 S654G	0.0573248	1	A	G	Var	Nonsyn	PB1	654	1960	PB1	1960	S	G	PB1_A1960G	5085	314	0	18
9750	BALB/C	F	BALBF	4X	ABCD	7	PB1 S654S	PB1 S654S	0.0725806	1	C	T	Var	Syn	PB1	654	1962	PB1	1962	S	S	PB1_C1962T	5111	124	0	9
10649	BALB/C	F	BALBF	1XP	1XP	Test (R11)	PB1 D658D	PB1 D658D	0.0350877	2	C	T	Var	Syn	PB1	658	1974	PB1	1974	D	D	PB1_C1974T	5101	114	0	4
10304	C57BL/6	M	BL6M	1X	C	10	PB1 A661P	PB1 A661P	0.014652	1	G	C	Var	Nonsyn	PB1	661	1981	PB1	1981	A	P	PB1_G1981C	4666	546	0	8
97860	BALB/C	F	BALBF	2X	CD	10	PB1 T662T	PB1 T662T	0.0100671	2	T	C	Var	Syn	PB1	662	1986	PB1	1986	T	T	PB1_T1986C	5050	2086	0	21
10220	C57BL/6	F	BL6F	2X	CD	10	PB1 H664R	PB1 H664R	0.0130597	1	A	G	Var	Nonsyn	PB1	664	1991	PB1	1991	H	R	PB1_A1991G	4902	536	0	7
10309	C57BL/6	F	BL6F	1X	A	10	PB1 K669E	PB1 K669E	0.0409515	1	A	G	Var	Nonsyn	PB1	669	2005	PB1	2005	K	E	PB1_A2005G	9563	3321	4	136
9286	C57BL/6	F	BL6F	1X	C	4	PB1 R672R	PB1 R672R	0.0208	1	C	A	Var	Syn	PB1	672	2016	PB1	2016	R	R	PB1_C2016A	4883	625	0	13
9943	C57BL/6	F	BL6F	2X	CD	7	PB1 R672R	PB1 R672R	0.0125	1	C	T	Var	Syn	PB1	672	2016	PB1	2016	R	R	PB1_C2016T	4883	720	0	9
9286	C57BL/6	F	BL6F	1X	C	4	PB1 S673S	PB1 S673S	0.0208668	1	T	A	Var	Syn	PB1	673	2019	PB1	2019	S	S	PB1_T2019A	4879	623	0	13
10309	C57BL/6	F	BL6F	1X	A	10	PB1 S673S	PB1 S673S	0.0213523	2	T	C	Var	Syn	PB1	673	2019	PB1	2019	S	S	PB1_T2019C	4602	1686	2	36
10305	C57BL/6	M	BL6M	2X	CD	10	PB1 L675I	PB1 L675I	0.0228898	1	C	A	Var	Nonsyn	PB1	675	2023	PB1	2023	L	I	PB1_C2023A	4978	699	2	16
10309	C57BL/6	F	BL6F	1X	A	10	PB1 L675P	PB1 L675P	0.0100953	1	T	C	Var	Nonsyn	PB1	675	2024	PB1	2024	L	P	PB1_T2024C	4802	1783	0	18
10299	C57BL/6	M	BL6M	1X	A	10	PB1 N676K	PB1 N676K	0.0195035	1	C	A	Var	Nonsyn	PB1	676	2028	PB1	2028	N	K	PB1_C2028A	4926	564	0	11
10220	C57BL/6	F	BL6F	2X	CD	10	PB1 T677R	PB1 T677R	0.0241327	2	C	G	Var	Nonsyn	PB1	677	2030	PB1	2030	T	R	PB1_C2030G	9316	1326	0	32
10220	C57BL/6	F	BL6F	2X	CD	10	PB1 S678T	PB1 S678T	0.0235562	1	G	C	Var	Nonsyn	PB1	678	2033	PB1	2033	S	T	PB1_G2033C	9166	1316	0	31
10220	C57BL/6	F	BL6F	2X	CD	10	PB1 S678R	PB1 S678R	0.0237918	1	C	A	Var	Nonsyn	PB1	678	2034	PB1	2034	S	R	PB1_C2034A	9277	1345	0	32
10317	C57BL/6	F	BL6F	1X	D	10	PB1 Q679Q	PB1 Q679Q	0.0306407	1	A	G	Var	Syn	PB1	679	2037	PB1	2037	Q	Q	PB1_A2037G	4741	359	0	11
10307	C57BL/6	M	BL6M	1X	D	10	PB1 R680K	PB1 R680K	0.0134814	1	G	A	Var	Nonsyn	PB1	680	2039	PB1	2039	R	K	PB1_G2039A	4452	1261	1	17
8235	C57BL/6	M	BL6M	Stock	C	1	PB1 R680R	PB1 R680R	0.0217391	1	G	A	Var	Syn	PB1	680	2040	PB1	2040	R	R	PB1_G2040A	4441	966	0	21
10648	BALB/C	F	BALBF	4X	ABCD	Test (R11)	PB1 I682I	PB1 I682I	0.148148	1	T	C	Var	Syn	PB1	682	2046	PB1	2046	I	I	PB1_T2046C	4399	135	0	20
10312	C57BL/6	F	BL6F	1X	B	10	PB1 E684E	PB1 E684E	0.0108827	1	G	A	Var	Syn	PB1	684	2052	PB1	2052	E	E	PB1_G2052A	4412	827	1	9
9940	C57BL/6	F	BL6F	1X	C	7	PB1 D685D	PB1 D685D	0.273469	3	T	C	Var	Syn	PB1	685	2055	PB1	2055	D	D	PB1_T2055C	9107	490	3	134
10311	C57BL/6	F	BL6F	4X	ABCD	10	PB1 D685E	PB1 D685E	0.0110772	1	T	G	Var	Nonsyn	PB1	685	2055	PB1	2055	D	E	PB1_T2055G	9107	6229	1	69
10305	C57BL/6	M	BL6M	2X	CD	10	PB1 E686G	PB1 E686G	0.0464666	6	A	G	Var	Nonsyn	PB1	686	2057	PB1	2057	E	G	PB1_A2057G	9197	2066	2	96
9287	C57BL/6	F	BL6F	2X	CD	4	PB1 E686E	PB1 E686E	0.0191898	3	A	G	Var	Syn	PB1	686	2058	PB1	2058	E	E	PB1_A2058G	4418	469	0	9
9750	BALB/C	F	BALBF	4X	ABCD	7	PB1 Y689Y	PB1 Y689Y	0.029316	5	T	C	Var	Syn	PB1	689	2067	PB1	2067	Y	Y	PB1_T2067C	4406	307	5	9
9945	C57BL/6	F	BL6F	1X	D	7	PB1 Y689Y	PB1 Y689Y	0.0566038	5	T	C	Var	Syn	PB1	689	2067	PB1	2067	Y	Y	PB1_T2067C	4740	159	3	9
10299	C57BL/6	M	BL6M	1X	A	10	PB1 K691K	PB1 K691K	0.296152	2	G	A	Var	Syn	PB1	691	2073	PB1	2073	K	K	PB1_G2073A	9174	1793	0	531
10220	C57BL/6	F	BL6F	2X	CD	10	PB1 C692C	PB1 C692C	0.011396	2	C	T	Var	Syn	PB1	692	2076	PB1	2076	C	C	PB1_C2076T	4622	702	0	8
10307	C57BL/6	M	BL6M	1X	D	10	PB1 C693*	PB1 C693*	0.0107896	1	C	A	Var	Stop	PB1	693	2079	PB1	2079	C	*	PB1_C2079A	4587	2039	0	22
97690	BALB/C	F	BALBF	2X	AB	10	PB1 E697K	PB1 E697K	0.0408163	3	G	A	Var	Nonsyn	PB1	697	2089	PB1	2089	E	K	PB1_G2089A	8598	4606	2	188
97830	BALB/C	F	BALBF	1X	C	10	PB1 K698N	PB1 K698N	0.0117294	1	A	T	Var	Nonsyn	PB1	698	2094	PB1	2094	K	N	PB1_A2094T	8394	3666	0	43
10314	C57BL/6	F	BL6F	1X	C	10	PB1 Y705Y	PB1 Y705Y	0.0593861	2	C	T	Var	Syn	PB1	705	2115	PB1	2115	Y	Y	PB1_C2115T	8282	4496	0	267
10302	C57BL/6	M	BL6M	1X	B	10	PB1 P708S	PB1 P708S	0.995238	3	C	T	Var	Nonsyn	PB1	708	2122	PB1	2122	P	S	PB1_C2122T	7520	420	0	418
10305	C57BL/6	M	BL6M	2X	CD	10	PB1 V715M	PB1 V715M	0.0154905	2	G	A	Var	Nonsyn	PB1	715	2143	PB1	2143	V	M	PB1_G2143A	3667	1162	0	18
10305	C57BL/6	M	BL6M	2X	CD	10	PB1 R723Q	PB1 R723Q	0.012945	1	G	A	Var	Nonsyn	PB1	723	2168	PB1	2168	R	Q	PB1_G2168A	5785	2163	2	28
10317	C57BL/6	F	BL6F	1X	D	10	PB1 D725G	PB1 D725G	0.0801887	1	A	G	Var	Nonsyn	PB1	725	2174	PB1	2174	D	G	PB1_A2174G	2718	212	3	17
10648	BALB/C	F	BALBF	4X	ABCD	Test (R11)	PB1 R727R	PB1 R727R	0.1341	3	A	G	Var	Syn	PB1	727	2181	PB1	2181	R	R	PB1_A2181G	2791	261	0	35
97850	BALB/C	F	BALBF	4X	ABCD	10	PB1 R727R	PB1 R727R	0.0101098	3	A	G	Var	Syn	PB1	727	2181	PB1	2181	R	R	PB1_A2181G	5438	3462	0	35
10220	C57BL/6	F	BL6F	2X	CD	10	PB1 D729E	PB1 D729E	0.0184723	1	C	A	Var	Nonsyn	PB1	729	2187	PB1	2187	D	E	PB1_C2187A	5215	2003	0	37
8312	C57BL/6	F	BL6F	Stock	D	1	PB1 K745K	PB1 K745K	0.0135699	1	G	A	Var	Syn	PB1	745	2235	PB1	2235	K	K	PB1_G2235A	1796	1916	0	26
9518	BALB/C	M	BALBM	1X	B	10	PB1 *758*	PB1 *758*	0.558824	1	G	A	Var	Syn	PB1	758	2274	PB1	2274	*	*	PB1_G2274A	1007	68	0	38
10299	C57BL/6	M	BL6M	1X	A	10	PB2 I30M	PB2 I30M	0.907652	1	A	G	Var	Nonsyn	PB2	30	92	PB2	90	I	M	PB2_A92G	2259	379	0	344
97730	BALB/C	F	BALBF	1X	B	10	PB2 G37G	PB2 G37G	0.0177187	1	G	A	Var	Syn	PB2	37	113	PB2	111	G	G	PB2_G113A	1386	1806	0	32
10304	C57BL/6	M	BL6M	1X	C	10	PB2 E40E	PB2 E40E	0.038835	1	A	G	Var	Syn	PB2	40	122	PB2	120	E	E	PB2_A122G	1440	515	0	20
97690	BALB/C	F	BALBF	2X	AB	10	PB2 A59A	PB2 A59A	0.0295539	2	T	C	Var	Syn	PB2	59	179	PB2	177	A	A	PB2_T179C	3372	3519	0	104
97850	BALB/C	F	BALBF	4X	ABCD	10	PB2 V67V	PB2 V67V	0.0145703	2	T	C	Var	Syn	PB2	67	203	PB2	201	V	V	PB2_T203C	3574	5422	0	79
10304	C57BL/6	M	BL6M	1X	C	10	PB2 N71S	PB2 N71S	0.017452	1	A	G	Var	Nonsyn	PB2	71	214	PB2	212	N	S	PB2_A214G	1886	573	0	10
97850	BALB/C	F	BALBF	4X	ABCD	10	PB2 E72G	PB2 E72G	0.0151771	3	A	G	Var	Nonsyn	PB2	72	217	PB2	215	E	G	PB2_A217G	1877	1779	2	27
8325	C57BL/6	F	BL6F	Stock	C	1	PB2 E72E	PB2 E72E	0.129032	2	G	A	Var	Syn	PB2	72	218	PB2	216	E	E	PB2_G218A	1868	31	2	4
9940	C57BL/6	F	BL6F	1X	C	7	PB2 E72E	PB2 E72E	0.0847458	2	G	A	Var	Syn	PB2	72	218	PB2	216	E	E	PB2_G218A	1868	59	2	5
97850	BALB/C	F	BALBF	4X	ABCD	10	PB2 Q73H	PB2 Q73H	0.033211	3	A	C	Var	Nonsyn	PB2	73	221	PB2	219	Q	H	PB2_A221C	3882	5450	1	181
97680	BALB/C	F	BALBF	1X	A	10	PB2 Q73Q	PB2 Q73Q	0.018949	1	A	G	Var	Syn	PB2	73	221	PB2	219	Q	Q	PB2_A221G	3882	3958	1	75
10311	C57BL/6	F	BL6F	4X	ABCD	10	PB2 G74R	PB2 G74R	0.0337662	1	G	A	Var	Nonsyn	PB2	74	222	PB2	220	G	R	PB2_G222A	3951	2310	0	78
9517	BALB/C	M	BALBM	4X	ABCD	10	PB2 W99*	PB2 W99*	0.205882	1	G	A	Var	Stop	PB2	99	299	PB2	297	W	*	PB2_G299A	4017	476	1	98
97690	BALB/C	F	BALBF	2X	AB	10	PB2 I147T	PB2 I147T	0.0592784	1	T	C	Var	Nonsyn	PB2	147	442	PB2	440	I	T	PB2_T442C	4340	3880	0	230
10305	C57BL/6	M	BL6M	2X	CD	10	PB2 G150G	PB2 G150G	0.0816327	1	T	C	Var	Syn	PB2	150	452	PB2	450	G	G	PB2_T452C	2076	49	0	4
0	STOCK	STOCK	STOCK	STOCK	STOCK	STOCK	PB2 E192E	PB2 E192E	0.0113895	1	A	G	Var	Syn	PB2	192	578	PB2	576	E	E	PB2_A578G	2110	1317	0	15
10302	C57BL/6	M	BL6M	1X	B	10	PB2 D195N	PB2 D195N	0.456026	1	G	A	Var	Nonsyn	PB2	195	585	PB2	583	D	N	PB2_G585A	4518	307	0	140
9297	C57BL/6	F	BL6F	2X	AB	4	PB2 D195D	PB2 D195D	0.0694444	1	T	C	Var	Syn	PB2	195	587	PB2	585	D	D	PB2_T587C	2055	144	0	10
10300	C57BL/6	M	BL6M	2X	AB	10	PB2 V212A	PB2 V212A	0.0655738	1	T	C	Var	Nonsyn	PB2	212	637	PB2	635	V	A	PB2_T637C	2262	61	0	4
9943	C57BL/6	F	BL6F	2X	CD	7	PB2 V212V	PB2 V212V	0.583333	2	C	T	Var	Syn	PB2	212	638	PB2	636	V	V	PB2_C638T	4317	48	0	28
10220	C57BL/6	F	BL6F	2X	CD	10	PB2 V212V	PB2 V212V	0.744949	2	C	T	Var	Syn	PB2	212	638	PB2	636	V	V	PB2_C638T	4317	396	0	295
10009	C57BL/6	M	BL6M	4X	ABCD	10	PB2 Q242Q	PB2 Q242Q	0.184211	1	G	A	Var	Syn	PB2	242	728	PB2	726	Q	Q	PB2_G728A	4180	152	0	28
97830	BALB/C	F	BALBF	1X	C	10	PB2 T245T	PB2 T245T	0.0198618	1	T	C	Var	Syn	PB2	245	737	PB2	735	T	T	PB2_T737C	1892	1158	1	23
97830	BALB/C	F	BALBF	1X	C	10	PB2 G248G	PB2 G248G	0.024583	1	A	G	Var	Syn	PB2	248	746	PB2	744	G	G	PB2_A746G	1824	1139	1	28
10312	C57BL/6	F	BL6F	1X	B	10	PB2 R251W	PB2 R251W	1	3	A	T	Var	Nonsyn	PB2	251	753	PB2	751	R	W	PB2_A753T	3893	214	1	214
10302	C57BL/6	M	BL6M	1X	B	10	PB2 R251K	PB2 R251K	0.0585366	1	G	A	Var	Nonsyn	PB2	251	754	PB2	752	R	K	PB2_G754A	1927	205	0	12
9518	BALB/C	M	BALBM	1X	B	10	PB2 Q288Q	PB2 Q288Q	0.461538	1	G	A	Var	Syn	PB2	288	866	PB2	864	Q	Q	PB2_G866A	1981	13	0	6
10009	C57BL/6	M	BL6M	4X	ABCD	10	PB2 G290G	PB2 G290G	0.481481	1	C	T	Var	Syn	PB2	290	872	PB2	870	G	G	PB2_C872T	3933	162	5	78
10309	C57BL/6	F	BL6F	1X	A	10	PB2 G291G	PB2 G291G	0.123779	1	G	A	Var	Syn	PB2	291	875	PB2	873	G	G	PB2_G875A	3550	307	0	38
10220	C57BL/6	F	BL6F	2X	CD	10	PB2 I297L	PB2 I297L	0.695205	2	A	C	Var	Nonsyn	PB2	297	891	PB2	889	I	L	PB2_A891C	2520	292	0	203
97730	BALB/C	F	BALBF	1X	B	10	PB2 K339E	PB2 K339E	0.062436	2	A	G	Var	Nonsyn	PB2	339	1017	PB2	1015	K	E	PB2_A1017G	3454	2931	0	183
10314	C57BL/6	F	BL6F	1X	C	10	PB2 K339E	PB2 K339E	0.039548	2	A	G	Var	Nonsyn	PB2	339	1017	PB2	1015	K	E	PB2_A1017G	1706	177	0	7
97860	BALB/C	F	BALBF	2X	CD	10	PB2 L345L	PB2 L345L	0.014366	1	T	C	Var	Syn	PB2	345	1037	PB2	1035	L	L	PB2_T1037C	3493	3202	0	46
97860	BALB/C	F	BALBF	2X	CD	10	PB2 R355G	PB2 R355G	0.0111235	1	A	G	Var	Nonsyn	PB2	355	1065	PB2	1063	R	G	PB2_A1065G	1884	1798	0	20
97730	BALB/C	F	BALBF	1X	B	10	PB2 R355R	PB2 R355R	0.012786	1	G	A	Var	Syn	PB2	355	1067	PB2	1065	R	R	PB2_G1067A	1798	1486	0	19
10305	C57BL/6	M	BL6M	2X	CD	10	PB2 E361K	PB2 E361K	0.0851064	1	G	A	Var	Nonsyn	PB2	361	1083	PB2	1081	E	K	PB2_G1083A	1836	47	0	4
10300	C57BL/6	M	BL6M	2X	AB	10	PB2 L374F	PB2 L374F	0.0526316	1	C	T	Var	Nonsyn	PB2	374	1122	PB2	1120	L	F	PB2_C1122T	1963	95	0	5
10313	C57BL/6	F	BL6F	2X	AB	10	PB2 L374P	PB2 L374P	0.0649351	1	T	C	Var	Nonsyn	PB2	374	1123	PB2	1121	L	P	PB2_T1123C	1878	77	0	5
97690	BALB/C	F	BALBF	2X	AB	10	PB2 A377A	PB2 A377A	0.0134635	1	A	G	Var	Syn	PB2	377	1133	PB2	1131	A	A	PB2_A1133G	3660	2971	1	40
97690	BALB/C	F	BALBF	2X	AB	10	PB2 L384L	PB2 L384L	0.0149068	1	G	A	Var	Syn	PB2	384	1154	PB2	1152	L	L	PB2_G1154A	3915	3220	0	48
97760	BALB/C	F	BALBF	1X	D	10	PB2 S393S	PB2 S393S	0.0577125	1	A	G	Var	Syn	PB2	393	1181	PB2	1179	S	S	PB2_A1181G	3780	2859	0	165
97690	BALB/C	F	BALBF	2X	AB	10	PB2 A395A	PB2 A395A	0.0199738	1	C	T	Var	Syn	PB2	395	1187	PB2	1185	A	A	PB2_C1187T	3671	3054	0	61
10304	C57BL/6	M	BL6M	1X	C	10	PB2 I399T	PB2 I399T	0.0328639	1	T	C	Var	Nonsyn	PB2	399	1198	PB2	1196	I	T	PB2_T1198C	1873	213	0	7
10304	C57BL/6	M	BL6M	1X	C	10	PB2 K412E	PB2 K412E	0.0432099	1	A	G	Var	Nonsyn	PB2	412	1236	PB2	1234	K	E	PB2_A1236G	2076	162	0	7
10009	C57BL/6	M	BL6M	4X	ABCD	10	PB2 Q433Q	PB2 Q433Q	0.519313	1	A	G	Var	Syn	PB2	433	1301	PB2	1299	Q	Q	PB2_A1301G	4117	233	0	121
10309	C57BL/6	F	BL6F	1X	A	10	PB2 F438S	PB2 F438S	0.0336538	1	T	C	Var	Nonsyn	PB2	438	1315	PB2	1313	F	S	PB2_T1315C	2000	208	0	7
10313	C57BL/6	F	BL6F	2X	AB	10	PB2 A442T	PB2 A442T	0.0612245	1	G	A	Var	Nonsyn	PB2	442	1326	PB2	1324	A	T	PB2_G1326A	2159	98	0	6
97860	BALB/C	F	BALBF	2X	CD	10	PB2 V463V	PB2 V463V	0.0539216	2	A	G	Var	Syn	PB2	463	1391	PB2	1389	V	V	PB2_A1391G	3880	3876	0	209
10313	C57BL/6	F	BL6F	2X	AB	10	PB2 D466G	PB2 D466G	0.157303	1	A	G	Var	Nonsyn	PB2	466	1399	PB2	1397	D	G	PB2_A1399G	2049	89	0	14
97680	BALB/C	F	BALBF	1X	A	10	PB2 K482R	PB2 K482R	0.999715	20	A	G	Var	Nonsyn	PB2	482	1447	PB2	1445	K	R	PB2_A1447G	3778	3514	0	3513
97690	BALB/C	F	BALBF	2X	AB	10	PB2 K482R	PB2 K482R	0.174671	20	A	G	Var	Nonsyn	PB2	482	1447	PB2	1445	K	R	PB2_A1447G	3778	3269	0	571
97850	BALB/C	F	BALBF	4X	ABCD	10	PB2 K482R	PB2 K482R	0.147788	20	A	G	Var	Nonsyn	PB2	482	1447	PB2	1445	K	R	PB2_A1447G	3778	3187	0	471
97730	BALB/C	F	BALBF	1X	B	10	PB2 K482R	PB2 K482R	0.118302	20	A	G	Var	Nonsyn	PB2	482	1447	PB2	1445	K	R	PB2_A1447G	3778	3415	0	404
97860	BALB/C	F	BALBF	2X	CD	10	PB2 K482R	PB2 K482R	1	20	A	G	Var	Nonsyn	PB2	482	1447	PB2	1445	K	R	PB2_A1447G	3778	3605	0	3605
10309	C57BL/6	F	BL6F	1X	A	10	PB2 K482R	PB2 K482R	0.997602	20	A	G	Var	Nonsyn	PB2	482	1447	PB2	1445	K	R	PB2_A1447G	3778	417	0	416
97690	BALB/C	F	BALBF	2X	AB	10	PB2 E492E	PB2 E492E	0.0401619	1	G	A	Var	Syn	PB2	492	1478	PB2	1476	E	E	PB2_G1478A	3888	3212	0	129
97830	BALB/C	F	BALBF	1X	C	10	PB2 R500R	PB2 R500R	0.060778	1	G	A	Var	Syn	PB2	500	1502	PB2	1500	R	R	PB2_G1502A	3667	2468	0	150
10009	C57BL/6	M	BL6M	4X	ABCD	10	PB2 L502L	PB2 L502L	0.473881	1	G	A	Var	Syn	PB2	502	1508	PB2	1506	L	L	PB2_G1508A	3725	268	0	127
10623	BALB/C	F	BALBF	1X	C	Test (R11)	PB2 N510N	PB2 N510N	0.148148	1	T	C	Var	Syn	PB2	510	1532	PB2	1530	N	N	PB2_T1532C	1950	27	0	4
9739	C57BL/6	F	BL6F	2X	AB	7	PB2 P515P	PB2 P515P	0.314136	2	T	C	Var	Syn	PB2	515	1547	PB2	1545	P	P	PB2_T1547C	4123	191	0	60
10313	C57BL/6	F	BL6F	2X	AB	10	PB2 P515P	PB2 P515P	0.268398	2	T	C	Var	Syn	PB2	515	1547	PB2	1545	P	P	PB2_T1547C	4123	231	0	62
10311	C57BL/6	F	BL6F	4X	ABCD	10	PB2 Q522L	PB2 Q522L	0.185897	4	A	T	Var	Nonsyn	PB2	522	1567	PB2	1565	Q	L	PB2_A1567T	4071	156	0	29
97690	BALB/C	F	BALBF	2X	AB	10	PB2 G523G	PB2 G523G	0.0511915	1	G	A	Var	Syn	PB2	523	1571	PB2	1569	G	G	PB2_G1571A	4115	3399	2	174
97680	BALB/C	F	BALBF	1X	A	10	PB2 Y531Y	PB2 Y531Y	0.0396432	1	C	T	Var	Syn	PB2	531	1595	PB2	1593	Y	Y	PB2_C1595T	4310	4036	0	160
97680	BALB/C	F	BALBF	1X	A	10	PB2 S534P	PB2 S534P	0.0195779	1	T	C	Var	Nonsyn	PB2	534	1602	PB2	1600	S	P	PB2_T1602C	4232	3933	6	77
97830	BALB/C	F	BALBF	1X	C	10	PB2 V547I	PB2 V547I	0.0121729	1	G	A	Var	Nonsyn	PB2	547	1641	PB2	1639	V	I	PB2_G1641A	2288	1643	0	20
10624	BALB/C	F	BALBF	2X	CD	Test (R11)	PB2 I562I	PB2 I562I	0.102564	3	T	C	Var	Syn	PB2	562	1688	PB2	1686	I	I	PB2_T1688C	2123	39	0	4
97860	BALB/C	F	BALBF	2X	CD	10	PB2 I562I	PB2 I562I	0.116312	3	T	C	Var	Syn	PB2	562	1688	PB2	1686	I	I	PB2_T1688C	4400	4230	1	492
10309	C57BL/6	F	BL6F	1X	A	10	PB2 Q581Q	PB2 Q581Q	0.13948	1	G	A	Var	Syn	PB2	581	1745	PB2	1743	Q	Q	PB2_G1745A	4470	423	0	59
10307	C57BL/6	M	BL6M	1X	D	10	PB2 P585P	PB2 P585P	0.0751708	1	T	C	Var	Syn	PB2	585	1757	PB2	1755	P	P	PB2_T1757C	4501	439	3	33
97690	BALB/C	F	BALBF	2X	AB	10	PB2 R589K	PB2 R589K	0.0176047	1	G	A	Var	Nonsyn	PB2	589	1768	PB2	1766	R	K	PB2_G1768A	4555	3749	2	66
8541	BALB/C	M	BALBM	Stock	C	1	PB2 L599L	PB2 L599L	0.958333	1	C	T	Var	Syn	PB2	599	1797	PB2	1795	L	L	PB2_C1797T	2313	24	0	23
10724	C57BL/6	F	BALBF	1XP	1XP	Test (R11)	PB2 R604R	PB2 R604R	0.0934844	3	G	A	Var	Syn	PB2	604	1814	PB2	1812	R	R	PB2_G1814A	4439	353	2	33
10732	C57BL/6	F	BALBF	1XP	1XP	Test (R11)	PB2 R604R	PB2 R604R	0.0496454	3	G	A	Var	Syn	PB2	604	1814	PB2	1812	R	R	PB2_G1814A	2101	141	0	7
97680	BALB/C	F	BALBF	1X	A	10	PB2 R604R	PB2 R604R	0.156258	3	G	A	Var	Syn	PB2	604	1814	PB2	1812	R	R	PB2_G1814A	4439	4051	2	633
10313	C57BL/6	F	BL6F	2X	AB	10	PB2 L636F	PB2 L636F	0.167832	2	G	T	Var	Nonsyn	PB2	636	1910	PB2	1908	L	F	PB2_G1910T	4690	286	5	48
9738	C57BL/6	F	BL6F	4X	ABCD	7	PB2 V638V	PB2 V638V	0.0869565	1	A	G	Var	Syn	PB2	638	1916	PB2	1914	V	V	PB2_A1916G	2452	46	0	4
10299	C57BL/6	M	BL6M	1X	A	10	PB2 V649A	PB2 V649A	0.145161	1	T	C	Var	Nonsyn	PB2	649	1948	PB2	1946	V	A	PB2_T1948C	2481	124	2	18
9750	BALB/C	F	BALBF	4X	ABCD	7	PB2 N657N	PB2 N657N	0.0416667	1	C	T	Var	Syn	PB2	657	1973	PB2	1971	N	N	PB2_C1973T	2181	264	0	11
10009	C57BL/6	M	BL6M	4X	ABCD	10	PB2 N659K	PB2 N659K	0.119741	1	C	A	Var	Nonsyn	PB2	659	1979	PB2	1977	N	K	PB2_C1979A	4626	309	0	37
10317	C57BL/6	F	BL6F	1X	D	10	PB2 T661I	PB2 T661I	0.0560748	1	C	T	Var	Nonsyn	PB2	661	1984	PB2	1982	T	I	PB2_C1984T	2250	214	0	12
10311	C57BL/6	F	BL6F	4X	ABCD	10	PB2 R664S	PB2 R664S	0.0157068	1	A	T	Var	Nonsyn	PB2	664	1994	PB2	1992	R	S	PB2_A1994T	2507	955	0	15
9945	C57BL/6	F	BL6F	1X	D	7	PB2 L668L	PB2 L668L	0.25	1	C	T	Var	Syn	PB2	668	2006	PB2	2004	L	L	PB2_C2006T	2499	24	0	6
10302	C57BL/6	M	BL6M	1X	B	10	PB2 K670K	PB2 K670K	0.0735294	1	A	G	Var	Syn	PB2	670	2012	PB2	2010	K	K	PB2_A2012G	2468	68	1	5
97690	BALB/C	F	BALBF	2X	AB	10	PB2 P679P	PB2 P679P	0.020688	1	A	T	Var	Syn	PB2	679	2039	PB2	2037	P	P	PB2_A2039T	4525	4157	0	86
97680	BALB/C	F	BALBF	1X	A	10	PB2 G685G	PB2 G685G	0.0121792	1	A	G	Var	Syn	PB2	685	2057	PB2	2055	G	G	PB2_A2057G	2345	2299	0	28
10312	C57BL/6	F	BL6F	1X	B	10	PB2 E687E	PB2 E687E	0.0165631	1	G	A	Var	Syn	PB2	687	2063	PB2	2061	E	E	PB2_G2063A	2381	483	0	8
10302	C57BL/6	M	BL6M	1X	B	10	PB2 A689S	PB2 A689S	0.0555556	1	G	T	Var	Nonsyn	PB2	689	2067	PB2	2065	A	S	PB2_G2067T	2362	72	0	4
10299	C57BL/6	M	BL6M	1X	A	10	PB2 V690V	PB2 V690V	0.0314136	1	T	C	Var	Syn	PB2	690	2072	PB2	2070	V	V	PB2_T2072C	2347	191	0	6
9293	C57BL/6	F	BL6F	1X	A	4	PB2 R692R	PB2 R692R	0.0372493	2	A	G	Var	Syn	PB2	692	2078	PB2	2076	R	R	PB2_A2078G	2131	349	0	13
9515	BALB/C	M	BALBM	1X	A	10	PB2 K699N	PB2 K699N	0.0693069	2	G	T	Var	Nonsyn	PB2	699	2099	PB2	2097	K	N	PB2_G2099T	2101	202	0	14
97680	BALB/C	F	BALBF	1X	A	10	PB2 D701N	PB2 D701N	0.0203632	21	G	A	Var	Nonsyn	PB2	701	2103	PB2	2101	D	N	PB2_G2103A	4043	3634	0	74
97850	BALB/C	F	BALBF	4X	ABCD	10	PB2 D701N	PB2 D701N	0.0493371	21	G	A	Var	Nonsyn	PB2	701	2103	PB2	2101	D	N	PB2_G2103A	4043	5959	0	294
97730	BALB/C	F	BALBF	1X	B	10	PB2 D701N	PB2 D701N	0.0257886	21	G	A	Var	Nonsyn	PB2	701	2103	PB2	2101	D	N	PB2_G2103A	4043	4692	0	121
9517	BALB/C	M	BALBM	4X	ABCD	10	PB2 D701N	PB2 D701N	0.0942883	21	G	A	Var	Nonsyn	PB2	701	2103	PB2	2101	D	N	PB2_G2103A	4043	1103	0	104
10311	C57BL/6	F	BL6F	4X	ABCD	10	PB2 D701N	PB2 D701N	0.923197	21	G	A	Var	Nonsyn	PB2	701	2103	PB2	2101	D	N	PB2_G2103A	4043	3190	0	2945
10009	C57BL/6	M	BL6M	4X	ABCD	10	PB2 D701N	PB2 D701N	0.998182	21	G	A	Var	Nonsyn	PB2	701	2103	PB2	2101	D	N	PB2_G2103A	4043	550	0	549
10305	C57BL/6	M	BL6M	2X	CD	10	PB2 D701N	PB2 D701N	0.996711	21	G	A	Var	Nonsyn	PB2	701	2103	PB2	2101	D	N	PB2_G2103A	4043	608	0	606
10307	C57BL/6	M	BL6M	1X	D	10	PB2 D701N	PB2 D701N	0.976626	21	G	A	Var	Nonsyn	PB2	701	2103	PB2	2101	D	N	PB2_G2103A	4043	2353	0	2298
10623	BALB/C	F	BALBF	1X	C	Test (R11)	PB2 D701D	PB2 D701D	0.0251572	1	T	C	Var	Syn	PB2	701	2105	PB2	2103	D	D	PB2_T2105C	1932	318	0	8
9738	C57BL/6	F	BL6F	4X	ABCD	7	PB2 L708L	PB2 L708L	0.136318	1	A	G	Var	Syn	PB2	708	2126	PB2	2124	L	L	PB2_A2126G	3792	1005	0	137
10648	BALB/C	F	BALBF	4X	ABCD	Test (R11)	PB2 V731V	PB2 V731V	0.0883978	4	G	A	Var	Syn	PB2	731	2195	PB2	2193	V	V	PB2_G2195A	1204	181	2	16
97680	BALB/C	F	BALBF	1X	A	10	PB2 R739R	PB2 R739R	0.0626618	1	G	A	Var	Syn	PB2	739	2219	PB2	2217	R	R	PB2_G2219A	2060	1931	0	121
97850	BALB/C	F	BALBF	4X	ABCD	10	PB2 D740N	PB2 D740N	0.59255	23	G	A	Var	Nonsyn	PB2	740	2220	PB2	2218	D	N	PB2_G2220A	2078	3463	1	2052
97730	BALB/C	F	BALBF	1X	B	10	PB2 D740N	PB2 D740N	0.480638	23	G	A	Var	Nonsyn	PB2	740	2220	PB2	2218	D	N	PB2_G2220A	2078	2634	1	1266
9515	BALB/C	M	BALBM	1X	A	10	PB2 D740N	PB2 D740N	1	23	G	A	Var	Nonsyn	PB2	740	2220	PB2	2218	D	N	PB2_G2220A	2078	332	1	332
9517	BALB/C	M	BALBM	4X	ABCD	10	PB2 D740N	PB2 D740N	0.347395	23	G	A	Var	Nonsyn	PB2	740	2220	PB2	2218	D	N	PB2_G2220A	2078	806	1	280
9537	BALB/C	M	BALBM	2X	CD	10	PB2 D740N	PB2 D740N	0.777778	23	G	A	Var	Nonsyn	PB2	740	2220	PB2	2218	D	N	PB2_G2220A	2078	18	1	14
9536	BALB/C	M	BALBM	1X	D	10	PB2 D740N	PB2 D740N	0.978022	23	G	A	Var	Nonsyn	PB2	740	2220	PB2	2218	D	N	PB2_G2220A	2078	91	1	89
10220	C57BL/6	F	BL6F	2X	CD	10	PB2 D740N	PB2 D740N	0.997944	23	G	A	Var	Nonsyn	PB2	740	2220	PB2	2218	D	N	PB2_G2220A	2078	11672	1	11648
